# Supplementary material for: Design, synthesis, and herbicidal activity of sec-p-menthane-7-amine derivatives as botanical herbicides
Source: Royal Society of Chemistry journal article supplement (doi:10.1039/d1ra04910k), 2021-01-01
Supplement: d1ra04910k1.pdf [file d1ra04910k1.pdf]

## Supplementary Information

### **Design, synthesis, and herbicidal activity of *sec-p*-menthane-7-amine derivatives as botanical herbicides**

Hongmei Zhang,<sup>ab</sup> Yuxiang Chen,<sup>a</sup> Shichao Xu,<sup>a</sup> Jing Wang,<sup>ab</sup> Huanhuan Dong,<sup>a</sup>

Zhendong Zhao,<sup>\*a</sup> and Jianxin Jiang<sup>\*b</sup>

*a. Institute of Chemical Industry of Forest Products, CAF, National Engineering Lab. for Biomass*

*Chemical Utilization, Key Lab. of Biomass Energy and Material, Jiangsu Province, Co-Innovation*

*Center of Efficient Processing and Utilization of Forest Resources, Jiangsu Province, Key Lab. of*

*Chemical Engineering of Forest Products, National Forestry and Grassland Administration, No. 16*

*Suojin Wucun, Nanjing, 210042, China.*

*b. College of Materials Science and Technology, Beijing Forestry University, No. 35 Qinghua Dong*

*Lu, Beijing, 100083, China*

\* Corresponding Authors: [zdzhao@189.cn](mailto:zdzhao@189.cn) (Z. D. Zhao); [jiangjx@bjfu.edu.cn](mailto:jiangjx@bjfu.edu.cn) (J. X. Jiang)

Other authors: [zhm182825@163.com](mailto:zhm182825@163.com) (H. M. Zhang); [cyxlhs@126.com](mailto:cyxlhs@126.com) (Y. X. Chen);

[xslhs@163.com](mailto:xslhs@163.com) (S. C. Xu); [njwj8324@163.com](mailto:njwj8324@163.com) (J. Wang); [18322597884@163.com](mailto:18322597884@163.com) (H. H. Dong)

|                                                                     | Page    |
|---------------------------------------------------------------------|---------|
| Characterization data                                               | S1-S7   |
| Figure S1-S107                                                      | S8-S62  |
| Table S1                                                            | S1      |
| Tables S2                                                           | S8      |
| Tables S3-S6                                                        | S62-S65 |
| Supporting information includes 65 pages,<br>107 Figures, 6 tables. |         |

Table S1 The preparation of *sec-p*-menthane-7-amine derivatives

| Compd.    | Yield (%) | Purity(%) | Compd.    | Yield (%) | Purity(%) |
|-----------|-----------|-----------|-----------|-----------|-----------|
| <b>3a</b> | 56.3      | 97.7      | <b>3n</b> | 81.1      | 95.6      |
| <b>3b</b> | 79.0      | 97.3      | <b>3o</b> | 95.5      | 96.6      |
| <b>3c</b> | 73.6      | 97.0      | <b>3p</b> | 93.6      | 97.0      |
| <b>3d</b> | 51.3      | 97.3      | <b>3q</b> | 95.8      | 96.6      |
| <b>3e</b> | 50.2      | 98.5      | <b>3r</b> | 94.0      | 98.9      |
| <b>3f</b> | 40.0      | 98.6      | <b>3s</b> | 71.5      | 98.6      |
| <b>3g</b> | 65.4      | 98.8      | <b>3t</b> | 92.2      | 95.4      |
| <b>3h</b> | 70.2      | 96.8      | <b>3u</b> | 91.6      | 96.5      |
| <b>3i</b> | 40.5      | 99.0      | <b>3v</b> | 92.7      | 94.9      |
| <b>3j</b> | 49.8      | 99.9      | <b>3w</b> | 98.1      | 99.9      |
| <b>3k</b> | 70.1      | 98.9      | <b>3x</b> | 94.3      | 97.0      |
| <b>3l</b> | 47.5      | 99.9      | <b>3y</b> | 80.3      | 98.6      |
| <b>3m</b> | 47.7      | 94.4      |           |           |           |

**2**, *p*-menthane-7-aldehyde, colourless liquid, *cis*- and *trans*-isomers mixture. <sup>1</sup>H NMR (500 MHz, CDCl<sub>3</sub>) δ (ppm): 9.65 (s, 1H, H-7), 9.55 (s, 1H, H-7'), 2.35 (d, *J* = 2.9 Hz, 1H, H-1), 2.13 – 2.09 (m, 3H, H-1, Ha-2', 6'), 1.95 (d, *J* = 12.4 Hz, 2H, Ha-3', 5'), 1.78 (d, *J* = 9.7 Hz, 2H, Ha-3, 5), 1.52 (t, *J* = 12.4 Hz, 4H, Ha-2, 6, He-2', 6'), 1.42 – 1.33 (m, 2H, H-8, 8'), 1.19 (d, *J* = 12.4 Hz, 2H, He-3' 5'), 0.99 (dd, *J* = 6.9, 6.4 Hz, 6H, H-4, 4', He-2,3,5,6), 0.82 (s, 3H, H-9), 0.81 (s, 3H, H-9'), 0.78 (s, 3H, H-10), 0.76 (s, 3H, H-10'). <sup>13</sup>C NMR (126 MHz, CDCl<sub>3</sub>) δ (ppm): 205.65 (C-7), 204.75 (C-7'), 50.54 (C-1), 47.03 (C-1'), 43.46 (C-4), 43.17 (C-4'), 32.68 (C-8), 31.98 (C-8'), 28.46 (C-3, 5), 26.38 (C-3', 5'), 26.13 (C-2, 6), 24.60 (C-2', 6'), 19.69 (C-9, 9', 10, 10'). FT-IR( $\nu$ /cm<sup>-1</sup>): 2925, 2856 (s,  $\nu_{C-H}$ ); 1724 (s,  $\nu_{C=O}$ ); 1448 (m,  $\delta_{C-H}$ ). HRMS (ESI) for C<sub>10</sub>H<sub>19</sub>O, calcd 155.1436, found 155.1438 [M+H]<sup>+</sup>.

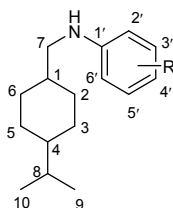

**3a**, N-((4-isopropylcyclohexyl)methyl)aniline, light yellow oil. <sup>1</sup>H NMR (500 MHz, CDCl<sub>3</sub>) δ (ppm): 7.24 (dd, *J* = 8.5, 7.4 Hz, 2H, H-3', 5'), 6.75 (t, *J* = 7.3 Hz, 1H, H-4'), 6.66 (d, *J* = 7.5 Hz, 2H, H-2', 6'), 3.76 (s, 1H, NH), 3.02 (d, *J* = 7.0 Hz, 2H, H-7), 1.95 (d, *J* = 8.7 Hz, 2H, Ha-3, 5), 1.83 (d, *J* = 9.0 Hz, 2H, Ha-2, 6), 1.64–1.55 (m, 1H, H-1), 1.50 (dd, *J* = 11.8, 6.8 Hz, 1H, H-8), 1.11–1.02 (m, 4H, He-2,3,5,6), 0.96 (s, 1H, H-4), 0.95 (s, 3H, H-9), 0.94 (s, 3H, H-10). <sup>13</sup>C NMR (126 MHz, CDCl<sub>3</sub>) δ (ppm): 148.70 (C-1'), 129.27 (C-3', 5'), 116.93 (C-4'), 112.67 (C-2', 6'), 50.67 (C-7), 44.27 (C-4), 37.84 (C-1), 32.94 (C-8), 31.52 (C-3, 5), 29.37 (C-2, 6), 19.93 (C-9, 10). FT-IR( $\nu$ /cm<sup>-1</sup>): 3419 (w,  $\nu_{N-H}$ ); 3050 (w,  $\nu_{C-H}$ ); 2916, 2848 (m,  $\nu_{C-H}$ ); 1600, 1503, 1469, 1446 (s,  $\nu_{C=C}$  of aromatic ring); 1319 (w,  $\nu_{C-N}$ ); 1257 (w,  $\delta_{C-N}$ ); 744, 689 (s,  $\delta_{C-H}$ ). HRMS (ESI) for C<sub>16</sub>H<sub>26</sub>N, calcd 232.2065, found 232.2066 [M+H]<sup>+</sup>.

**3b**, N-((4-isopropylcyclohexyl)methyl)-4-methylaniline, light yellow oil.  $^1\text{H}$  NMR (500 MHz,  $\text{CDCl}_3$ )  $\delta$  (ppm): 7.03 (d,  $J=8.0$  Hz, 2H, H-3', 5'), 6.58 (d,  $J=8.5$  Hz, 2H, H-2', 6'), 5.31 (s, 1H, NH), 2.98 (d,  $J=6.5$  Hz, 2H, H-7), 2.29 (s, 3H, 4'- $\text{CH}_3$ ), 1.92 (d,  $J=9.0$  Hz, 2H, Ha-3, 5), 1.80 (d,  $J=9.0$  Hz, 2H, Ha-2, 6), 1.59–1.52 (m, 1H, H-1), 1.48 (dd,  $J=11.9, 6.7$  Hz, 1H, H-8), 1.08–1.00 (m, 4H, He-2,3,5,6), 0.95 (d,  $J=5.6$  Hz, 1H, H-4), 0.93 (s, 3H, H-9), 0.91 (s, 3H, H-10).  $^{13}\text{C}$  NMR (126 MHz,  $\text{CDCl}_3$ )  $\delta$  (ppm): 146.48 (C-1'), 129.77 (C-3',5'), 126.08 (C-4'), 112.88 (C-2',6'), 51.07 (C-7), 44.29 (C-4), 37.83 (C-1), 32.95 (C-8), 31.53 (C-3, 5), 29.38 (C-2, 6), 20.45 (4'- $\text{CH}_3$ ), 19.93 (C-9, 10). FT-IR( $\nu/\text{cm}^{-1}$ ): 3414 (w,  $\nu_{\text{N-H}}$ ); 2916, 2850 (m,  $\nu_{\text{C-H}}$ ); 1618, 1518, 1470, 1446 (s,  $\nu_{\text{C=C}}$  of aromatic ring); 1316 (w,  $\nu_{\text{C-N}}$ ); 1253 (w,  $\delta_{\text{C-N}}$ ); 803 (s,  $\delta_{\text{C-H}}$ ). HRMS (ESI) for  $\text{C}_{17}\text{H}_{28}\text{N}$ , calcd 246.2222, found 246.2224  $[\text{M}+\text{H}]^+$ .

**3c**, N-((4-isopropylcyclohexyl)methyl)-3-methylaniline, light yellow oil.  $^1\text{H}$  NMR (500 MHz,  $\text{CDCl}_3$ )  $\delta$  (ppm): 7.14 (t,  $J=7.0$  Hz, 1H, H-5'), 6.59 (d,  $J=7.5$  Hz, 1H, H-2'), 6.53–6.47 (t,  $J=6.5$  Hz, 2H, H-4', 6'), 5.34 (s, 1H, NH), 3.02 (d,  $J=6.5$  Hz, 2H, H-7), 2.37 (s, 3H, 3'- $\text{CH}_3$ ), 1.96 (d,  $J=9.2$  Hz, 2H, Ha-3, 5), 1.84 (d,  $J=8.9$  Hz, 2H, Ha-2, 6), 1.65–1.57 (m, 1H, H-1), 1.51 (dd,  $J=11.8, 6.8$  Hz, 1H, H-8), 1.07 (dt,  $J=12.3, 9.5$  Hz, 4H, He-2, 3, 5, 6), 0.98 (d,  $J=5.4$  Hz, 1H, H-4), 0.96 (s, 3H, H-9), 0.95 (s, 3H, H-10).  $^{13}\text{C}$  NMR (126 MHz,  $\text{CDCl}_3$ )  $\delta$  (ppm): 148.77 (C-1'), 139.00 (C-3'), 129.16 (C-5'), 117.92 (C-4'), 113.48 (C-2'), 109.87 (C-6'), 50.72 (C-7), 44.29 (C-4), 37.89 (C-1), 32.96 (C-8), 31.54 (C-3, 5), 29.39 (C-2, 6), 21.74 (3'- $\text{CH}_3$ ), 19.94 (C-9, 10). FT-IR( $\nu/\text{cm}^{-1}$ ): 3415 (w,  $\nu_{\text{N-H}}$ ); 2915, 2848 (m,  $\nu_{\text{C-H}}$ ); 1603, 1589, 1509, 1490 (s,  $\nu_{\text{C=C}}$  of aromatic ring); 1326 (w,  $\nu_{\text{C-N}}$ ); 1305 (w,  $\delta_{\text{C-N}}$ ); 764, 690 (s,  $\delta_{\text{C-H}}$ ). HRMS (ESI) for  $\text{C}_{17}\text{H}_{28}\text{N}$ , calcd 246.2222, found 246.2219  $[\text{M}+\text{H}]^+$ .

**3d**, 3-fluoro-N-((4-isopropylcyclohexyl)methyl)aniline, light yellow oil.  $^1\text{H}$  NMR (500 MHz,  $\text{CDCl}_3$ )  $\delta$  (ppm): 7.09 (t,  $J=8.0$  Hz, 1H, H-5'), 6.78 (dd,  $J=7.8, 1.5$  Hz, 1H, H-2'), 6.72 (t,  $J=2.0$  Hz, 1H, H-6'), 6.49 (dd,  $J=8.2, 1.5$  Hz, 1H, H-4'), 3.85 (s, 1H, NH), 2.92 (d,  $J=6.6$  Hz, 2H, H-7), 1.88 (d,  $J=9.4$  Hz, 2H, Ha-3, 5), 1.78 (d,  $J=8.9$  Hz, 2H, Ha-2, 6), 1.57–1.54 (m, 1H, H-1), 1.45 (dd,  $J=11.8, 6.7$  Hz, 1H, H-8), 1.04–0.97 (m, 5H, He-2, 3, 5, 6, H-4), 0.89 (s, 3H, H-9), 0.88 (s, 3H, H-10).  $^{13}\text{C}$  NMR (126 MHz,  $\text{CDCl}_3$ )  $\delta$  (ppm): 165.21 (C-3'), 150.51 (C-1'), 130.24 (C-5'), 108.57 (C-6'), 103.27 (C-4'), 99.18 (C-2'), 50.51 (C-7), 44.19 (C-4), 37.75 (C-1), 32.75 (C-8), 31.42 (C-3, 5), 29.29 (C-2, 6), 19.87 (C-9, 10). FT-IR( $\nu/\text{cm}^{-1}$ ): 3427 (w,  $\nu_{\text{N-H}}$ ); 2919, 2849 (m,  $\nu_{\text{C-H}}$ ); 1620, 1587, 1509, 1495 (s,  $\nu_{\text{C=C}}$  of aromatic ring); 1334 (w,  $\nu_{\text{C-N}}$ ); 1283 (w,  $\delta_{\text{C-N}}$ ); 1175, 1147 (s,  $\nu_{\text{C-F}}$ ); 754, 680 (s,  $\delta_{\text{C-H}}$ ). HRMS (ESI) for  $\text{C}_{16}\text{H}_{25}\text{FN}$ , calcd. 250.1971, found 250.1968  $[\text{M}+\text{H}]^+$ .

**3e**, 4-fluoro-N-((4-isopropylcyclohexyl)methyl)aniline, light yellow oil.  $^1\text{H}$  NMR (500 MHz,  $\text{CDCl}_3$ )  $\delta$  (ppm): 6.90 (t,  $J=8.0$  Hz, 1H, H-2', 6'), 6.55 (dd,  $J=7.8, 1.5$  Hz, 1H, H-3', 5'), 5.32 (s, 1H, NH), 2.94 (d,  $J=6.6$  Hz, 2H, H-7), 1.90 (d,  $J=9.4$  Hz, 2H, Ha-3, 5), 1.78 (d,  $J=8.9$  Hz, 2H, Ha-2, 6), 1.60–1.52 (m, 1H, H-1), 1.46 (dd,  $J=11.9, 6.6$  Hz, 1H, H-8), 1.05–0.99 (m, 5H, He-2, 3, 5, 6, H-4), 0.90 (s, 3H, H-9), 0.89 (s, 3H, H-10).  $^{13}\text{C}$  NMR (126 MHz,  $\text{CDCl}_3$ )  $\delta$  (ppm): 156.51 (C-4'), 145.06 (C-1'), 115.68 (C-2', 6'), 113.41 (C-3', 5'), 50.37 (C-7), 44.21 (C-4), 37.80 (C-1), 32.88 (C-8), 31.46 (C-3, 5), 29.31 (C-2, 6), 19.86 (C-9, 10). FT-IR( $\nu/\text{cm}^{-1}$ ): 3424 (w,  $\nu_{\text{N-H}}$ ); 2917, 2850 (m,  $\nu_{\text{C-H}}$ ); 1612, 1580, 1470, 1447 (s,  $\nu_{\text{C=C}}$  of aromatic ring); 1316 (w,  $\nu_{\text{C-N}}$ ); 1257 (w,  $\delta_{\text{C-N}}$ ); 1219 (s,  $\nu_{\text{C-F}}$ ); 815 (s,  $\delta_{\text{C-H}}$ ). HRMS (ESI) for  $\text{C}_{16}\text{H}_{25}\text{FN}$ , calcd. 250.1971, found 250.1969  $[\text{M}+\text{H}]^+$ .

**3f**, 2-chloro-N-((4-isopropylcyclohexyl)methyl)aniline, light yellow oil.  $^1\text{H}$  NMR (500 MHz,  $\text{CDCl}_3$ )  $\delta$  (ppm): 7.30–7.25 (m, 1H, H-3'), 7.17 (dd,  $J=11.7, 7.7$  Hz, 1H, H-5'), 6.68 (t,  $J=8.7$  Hz, 1H, H-6'), 6.63 (t,  $J=7.6$  Hz, 1H, H-4'), 5.33 (s, 1H, NH), 3.15 (d,  $J=6.5$  Hz, 1H, Ha-7), 3.04 (d,  $J=3.9$  Hz, 1H, He-7), 1.93 (d,  $J=5.1$  Hz, 1H, Ha-3), 1.80 (d,  $J=4.7$  Hz, 1H, Ha-5), 1.60 (dd,  $J=11.2, 6.1$  Hz, 2H, Ha-2, 6), 1.54–1.49 (m, 1H, H-1), 1.45–1.39 (m, 1H, H-8), 1.19–1.14 (m, 1H, H-4), 1.07–1.02 (m, 4H, He-2, 3, 5, 6), 0.91 (t,  $J=6.9$  Hz, 6H, H-9, 10).  $^{13}\text{C}$  NMR (126 MHz,  $\text{CDCl}_3$ )  $\delta$  (ppm): 144.30 (C-1'), 129.08 (C-3', 5'), 127.79 (C-4'), 116.64 (C-2'), 111.10 (C-6'), 50.27 (C-7), 44.17 (C-4), 37.60 (C-1), 32.88 (C-8), 31.41 (C-3), 29.27 (C-5), 27.56 (C-2), 25.61 (C-6), 20.31 (C-9), 19.87 (C-10). FT-IR( $\nu/\text{cm}^{-1}$ ): 3425 (w,  $\nu_{\text{N-H}}$ ); 2918, 2851 (m,  $\nu_{\text{C-H}}$ ); 1597, 1511, 1459, 1431 (s,  $\nu_{\text{C=C}}$  of aromatic ring); 1323 (w,  $\nu_{\text{C-N}}$ ); 1290 (w,  $\delta_{\text{C-N}}$ ); 1032 (s,  $\nu_{\text{C-Cl}}$ ); 736 (s,  $\delta_{\text{C-H}}$ ). HRMS (ESI) for  $\text{C}_{16}\text{H}_{25}\text{ClN}$ , calcd. 266.1676, found 266.1677 [ $\text{M}+\text{H}$ ] $^+$ .

**3g**, 3-chloro-N-((4-isopropylcyclohexyl)methyl)aniline, light yellow oil.  $^1\text{H}$  NMR (500 MHz,  $\text{CDCl}_3$ )  $\delta$  (ppm): 7.09 (t,  $J=8.0$  Hz, 1H, H-5'), 6.67 (dd,  $J=7.8, 1.5$  Hz, 1H, H-2'), 6.59 (t,  $J=2.0$  Hz, 1H, H-4'), 6.48 (dd,  $J=8.2, 1.5$  Hz, 1H, H-6'), 5.32 (s, 1H, NH), 2.96 (d,  $J=6.6$  Hz, 2H, H-7), 1.90 (d,  $J=9.4$  Hz, 2H, Ha-3, 5), 1.80 (d,  $J=8.9$  Hz, 2H, Ha-2, 6), 1.60–1.53 (m, 1H, H-1), 1.47 (dd,  $J=11.9, 6.8$  Hz, 1H, H-8), 1.08–0.98 (m, 4H, He-2, 3, 5, 6), 0.94 (d,  $J=4.4$  Hz, 1H, H-4), 0.92 (s, 3H, H-9), 0.91 (s, 3H, H-10).  $^{13}\text{C}$  NMR (126 MHz,  $\text{CDCl}_3$ )  $\delta$  (ppm): 149.79 (C-1'), 135.02 (C-3'), 130.16 (C-5'), 116.64 (C-4'), 112.09 (C-2'), 111.02 (C-6'), 50.41 (C-7), 44.18 (C-4), 37.71 (C-1), 32.90 (C-8), 31.41 (C-3, 5), 29.28 (C-2, 6), 19.90 (C-9, 10). FT-IR( $\nu/\text{cm}^{-1}$ ): 3422 (w,  $\nu_{\text{N-H}}$ ); 2916, 2849 (m,  $\nu_{\text{C-H}}$ ); 1595, 1574, 1501, 1485 (s,  $\nu_{\text{C=C}}$  of aromatic ring); 1325 (w,  $\nu_{\text{C-N}}$ ); 1086 (m,  $\nu_{\text{C-Cl}}$ ); 759, 680 (s,  $\delta_{\text{C-H}}$ ). HRMS (ESI) for  $\text{C}_{16}\text{H}_{25}\text{ClN}$ , calcd. 266.1676, found 266.1678 [ $\text{M}+\text{H}$ ] $^+$ .

**3h**, 4-chloro-N-((4-isopropylcyclohexyl)methyl)aniline, light yellow oil.  $^1\text{H}$  NMR (500 MHz,  $\text{CDCl}_3$ )  $\delta$  (ppm): 7.14 (d,  $J=8.8$  Hz, 2H, H-3', 5'), 6.54 (d,  $J=8.8$  Hz, 2H, H-2', 6'), 5.33 (s, 1H, NH), 2.95 (d,  $J=6.7$  Hz, 2H, H-7), 1.90 (d,  $J=8.9$  Hz, 2H, Ha-3, 5), 1.80 (d,  $J=8.8$  Hz, 2H, Ha-2, 6), 1.59–1.44 (m, 2H, H-1, 8), 1.02 (dt,  $J=11.4, 9.2$  Hz, 4H, He-2, 3, 5, 6), 0.93 (s, 1H, H-4), 0.92 (s, 3H, H-9), 0.90 (s, 3H, H-10).  $^{13}\text{C}$  NMR (126 MHz,  $\text{CDCl}_3$ )  $\delta$  (ppm): 147.23 (C-1'), 129.02 (C-3', 5'), 121.31 (C-4'), 113.67 (C-2', 6'), 50.73 (C-7), 44.19 (C-4), 37.73 (C-1), 32.90 (C-8), 31.43 (C-3, 5), 29.30 (C-2, 6), 19.90 (C-9, 10). FT-IR( $\nu/\text{cm}^{-1}$ ): 3422 (w,  $\nu_{\text{N-H}}$ ); 2916, 2849 (m,  $\nu_{\text{C-H}}$ ); 1600, 1498, 1470, 1446 (s,  $\nu_{\text{C=C}}$  of aromatic ring); 1315 (w,  $\nu_{\text{C-N}}$ ); 1175 (w,  $\delta_{\text{C-N}}$ ); 1093 (s,  $\nu_{\text{C-Cl}}$ ); 811 (s,  $\delta_{\text{C-H}}$ ). HRMS (ESI) for  $\text{C}_{16}\text{H}_{25}\text{ClN}$ , calcd. 266.1676, found 266.1674 [ $\text{M}+\text{H}$ ] $^+$ .

**3i**, 2-bromo-N-((4-isopropylcyclohexyl)methyl)aniline, light yellow oil.  $^1\text{H}$  NMR (500 MHz,  $\text{CDCl}_3$ )  $\delta$  (ppm): 7.41 (d,  $J=7.9$  Hz, 1H, H-3'), 7.20–7.14 (m, 1H, H-5'), 6.63 (t,  $J=8.3$  Hz, 1H, H-6'), 6.54 (t,  $J=7.6$  Hz, 1H, H-4'), 5.30 (s, 1H, NH), 3.14–3.09 (t,  $J=5.5$  Hz, 1H, Ha-7), 3.00 (t,  $J=6.0$  Hz, 1H, He-7), 1.90 (d,  $J=5.1$  Hz, 1H, Ha-3), 1.77 (d,  $J=4.6$  Hz, 1H, Ha-5), 1.57 (dd,  $J=11.1, 6.0$  Hz, 2H, Ha-2, 6), 1.51–1.45 (m, 1H, H-1), 1.44–1.37 (m, 1H, H-8), 1.17–1.11 (m, 1H, H-4), 1.02 (q,  $J=10.5, 19$  Hz, 4H, He-2, 3, 5, 6), 0.88 (t,  $J=6.8$  Hz, 6H, H-9, 10).  $^{13}\text{C}$  NMR (126 MHz,  $\text{CDCl}_3$ )  $\delta$  (ppm): 145.22 (C-1'), 132.35 (C-3', 5'), 128.46 (C-4'), 117.21 (C-2'), 111.21 (C-6'), 50.44 (C-7), 44.16 (C-4), 37.53 (C-1), 32.88 (C-8), 31.41 (C-3), 29.27 (C-5), 27.56 (C-2), 25.62 (C-6), 20.32 (C-9), 19.88 (C-10). FT-IR( $\nu/\text{cm}^{-1}$ ): 3415 (w,  $\nu_{\text{N-H}}$ ); 2917, 2850 (m,  $\nu_{\text{C-H}}$ ); 1596, 1508, 1454 (s,  $\nu_{\text{C=C}}$  of aromatic ring); 1321 (w,  $\nu_{\text{C-N}}$ ); 1071 (s,  $\nu_{\text{C-Br}}$ ); 736 (s,  $\delta_{\text{C-H}}$ ). HRMS (ESI) for  $\text{C}_{16}\text{H}_{25}\text{BrN}$ , calcd. 310.1170, found 310.1174 [ $\text{M}+\text{H}$ ] $^+$ .

**3j**, 3-bromo-N-((4-isopropylcyclohexyl)methyl)aniline, light yellow oil. <sup>1</sup>H NMR (500 MHz, CDCl<sub>3</sub>) δ (ppm): 7.00 (t, *J*=8.0 Hz, 1H, H-5'), 6.78 (dd, *J*=7.8, 1.5 Hz, 1H, H-2'), 6.72 (t, *J*=2.0 Hz, 1H, H-4'), 6.49 (dd, *J*=8.2, 1.5 Hz, 1H, H-6'), 3.78(s, 1H, NH), 2.92 (d, *J*=6.6 Hz, 2H, H-7), 1.87 (d, *J*=9.4 Hz, 2H, Ha-3, 5), 1.77 (d, *J*=8.9 Hz, 2H, Ha-2, 6), 1.56–1.52 (m, 1H, H-1), 1.44–1.40 (m, 1H, H-8), 1.06–0.94 (m, 5H, He-2, 3, 5, 6, H-4), 0.92 (s, 3H, H-9), 0.87 (s, 3H, H-10). <sup>13</sup>C NMR (126 MHz, CDCl<sub>3</sub>) δ (ppm): 149.93 (C-1'), 130.45 (C-3'), 123.34 (C-5'), 119.56 (C-4'), 115.02 (C-2'), 111.41 (C-6'), 50.39 (C-7), 44.18 (C-4), 37.74 (C-1), 32.88 (C-8), 31.41 (C-3, 5), 29.28 (C-2, 6), 19.89 (C-9, 10). FT-IR(*ν*/cm<sup>-1</sup>): 3422 (w, *ν*<sub>N-H</sub>); 2953, 2916, 2848 (m, *ν*<sub>C-H</sub>); 1593, 1571, 1498, 1481 (s, *ν*<sub>C=C of aromatic ring</sub>); 1323 (w, *ν*<sub>C-N</sub>); 984 (s, *ν*<sub>C-Br</sub>); 757, 679 (s, *δ*<sub>C-H</sub>). HRMS (ESI) for C<sub>16</sub>H<sub>25</sub>BrN, calcd. 310.1170, found 310.1173 [M+H]<sup>+</sup>.

**3k**, N-((4-isopropylcyclohexyl)methyl)-4-methoxyaniline, light yellow oil. <sup>1</sup>H NMR (500 MHz, CDCl<sub>3</sub>) δ (ppm): 6.82 (d, *J*=8.9 Hz, 2H, C-2', 5'), 6.61 (d, *J*=8.9 Hz, 2H, C-3', 6'), 3.78 (s, 3H, 4'-OCH<sub>3</sub>), 2.94 (d, *J*=6.6 Hz, 2H, H-7), 1.91 (d, *J*=8.3 Hz, 2H, Ha-3, 5), 1.79 (d, *J*=6.2 Hz, 2H, Ha-2, 6), 1.54 (dd, *J*=8.0, 4.7 Hz, 1H, H-1), 1.51–1.43 (m, 1H, H-8), 1.10–0.98 (m, 5H, He-2, 3, 5, 6, H-4), 0.91 (s, 3H, H-9), 0.90 (s, 3H, H-10). <sup>13</sup>C NMR (126 MHz, CDCl<sub>3</sub>) δ (ppm): 151.81 (C-4'), 143.03 (C-1'), 114.91 (C-3', 5'), 113.92 (C-2', 6'), 55.85 (4'-OCH<sub>3</sub>), 51.69 (C-7), 44.25 (C-4), 37.83 (C-1), 32.92 (C-8), 31.51 (C-3, 5), 29.35 (C-2, 6), 19.89(C-9, 10). FT-IR(*ν*/cm<sup>-1</sup>): 3406 (w, *ν*<sub>N-H</sub>); 2915, 2848 (m, *ν*<sub>C-H</sub>); 1618, 1510, 1464 (s, *ν*<sub>C=C of aromatic ring</sub>); 1232 (s, *ν*<sub>C-N</sub>); 1037 (s, *ν*<sub>C-O</sub>); 815 (s, *δ*<sub>C-H</sub>). HRMS (ESI) for C<sub>17</sub>H<sub>28</sub>NO, calcd. 262.2171, found 262.2170 [M+H]<sup>+</sup>.

**3l**, N-((4-isopropylcyclohexyl)methyl)-3-(trifluoromethoxy)aniline, light yellow oil. <sup>1</sup>H NMR (500 MHz, CDCl<sub>3</sub>) δ (ppm): 7.13 (t, *J*=8.2 Hz, 1H, H-5'), 6.50 (dd, *J*=14.9, 8.6 Hz, 2H, H-2', 6'), 3.86 (s, 1H, NH), 2.94 (d, *J*=6.6 Hz, 2H, H-7), 1.87 (d, *J*=9.4 Hz, 2H, Ha-3, 5), 1.77 (d, *J*=8.9 Hz, 2H, Ha-2, 6), 1.56–1.51 (m, 1H, H-1), 1.44 (dd, *J*=13.4, 5.1 Hz, 1H, H-8), 1.04–0.98 (m, 5H, He-2, 3, 5, 6, H-4), 0.88 (s, 3H, H-9), 0.87 (s, 3H, H-10). <sup>13</sup>C NMR (126 MHz, CDCl<sub>3</sub>) δ (ppm): 150.94 (C-3'), 150.42 (C-1'), 130.44 (OCF<sub>3</sub>), 111.32 (C-2', 6'), 108.91 (C-5'), 104.98 (C-4'), 50.82 (C-7), 44.55 (C-4), 38.15 (C-1), 33.24 (C-8), 31.78 (C-3, 5), 29.65 (C-2, 6), 20.21 (C-9, 10). FT-IR(*ν*/cm<sup>-1</sup>): 3432 (w, *ν*<sub>N-H</sub>); 2919, 2852 (m, *ν*<sub>C-H</sub>); 1614, 1587, 1510 (m, *ν*<sub>C=C of aromatic ring</sub>); 1248, 1215 (s, *ν*<sub>C-O</sub>); 1152 (s, *ν*<sub>C-N</sub>); 699 (m, *δ*<sub>C-H</sub>). HRMS (ESI) for C<sub>17</sub>H<sub>25</sub>F<sub>3</sub>NO, calcd. 316.1888, found 316.1888 [M+H]<sup>+</sup>.

**3m**, N-((4-isopropylcyclohexyl)methyl)-4-(trifluoromethoxy)aniline, light yellow oil. <sup>1</sup>H NMR (500 MHz, CDCl<sub>3</sub>) δ (ppm): 7.05 (d, *J*=8.7 Hz, 2H, H-2', 6'), 6.56 (d, *J*=8.9 Hz, 2H, H-3', 5'), 3.80 (s, 1H, NH), 2.96 (d, *J*=6.6 Hz, 2H, H-7), 1.90 (d, *J*=9.4 Hz, 2H, Ha-3, 5), 1.79 (d, *J*=8.9 Hz, 2H, Ha-2, 6), 1.54–1.52 (m, 1H, H-1), 1.46 (dd, *J*=11.8, 6.7 Hz, 1H, H-8), 1.06–0.99 (m, 5H, He-2, 3, 5, 6, H-4), 0.91 (s, 3H, H-9), 0.89 (s, 3H, H-10). <sup>13</sup>C NMR (126 MHz, CDCl<sub>3</sub>) δ (ppm): 147.42 (C-1', 4'), 140.05 (OCF<sub>3</sub>), 122.40 (C-3', 5'), 112.69 (C-2', 6'), 50.79 (C-7), 44.19 (C-4), 37.75 (C-1), 32.87 (C-8), 31.42 (C-3, 5), 29.27 (C-2, 6), 19.84 (C-9, 10). FT-IR(*ν*/cm<sup>-1</sup>): 3436 (w, *ν*<sub>N-H</sub>); 2920, 2852 (m, *ν*<sub>C-H</sub>); 1612, 1513, 1471 (s, *ν*<sub>C=C of aromatic ring</sub>); 1248, 1190 (s, *ν*<sub>C-O</sub>); 1154 (s, *ν*<sub>C-N</sub>); 826 (m, *δ*<sub>C-H</sub>). HRMS (ESI) for C<sub>17</sub>H<sub>25</sub>F<sub>3</sub>NO, calcd. 316.1888, found 316.1889 [M+H]<sup>+</sup>.

**3n**, N-((4-isopropylcyclohexyl)methyl)butan-1-amine, light yellow oil. <sup>1</sup>H NMR (500 MHz, CDCl<sub>3</sub>) δ (ppm): 2.56–2.50 (t, *J*=7.2 Hz, 2H, H-1'), 2.39 (d, *J*=6.7 Hz, 2H, H-7), 1.93 (s, 1H, NH), 1.75 (d, *J*=11.9 Hz, 2H, Ha-3, 5), 1.67 (d, *J*=8.7 Hz, 2H, Ha-2, 6), 1.42 (dd, *J*=14.9, 7.7 Hz, 4H, H-2', 3'), 1.39–1.33 (m,

1H, H-1), 1.29 (dd,  $J=14.8, 7.2$  Hz, 1H, H-8), 0.96-0.91 (m, 5H, He-2, 3, 5, 6, H-4), 0.87 (t,  $J=7.3$  Hz, 3H, H-4'), 0.82 (s, 3H, H-9), 0.80 (s, 3H, H-10).  $^{13}\text{C}$  NMR (126 MHz,  $\text{CDCl}_3$ )  $\delta$  (ppm): 56.79 (C-7), 49.87 (C-1'), 44.25 (C-4), 38.00 (C-1), 32.88 (C-8), 32.14 (C-2'), 31.58 (C-3, 5), 29.36 (C-2, 6), 20.50 (C-3'), 19.81 (C-9, 10), 13.99 (C-4'). FT-IR( $\nu/\text{cm}^{-1}$ ): 2955, 2915, 2850 (s,  $\nu_{\text{C-H}}$ ); 1461, 1447 (s,  $\delta_{\text{C-H}}$  of aliphatic chain); 1338 (m,  $\nu_{\text{C-N}}$ ); 1129 (m,  $\delta_{\text{C-N}}$ ); 733 (s,  $\nu_{\text{C-C}}$ ). HRMS (ESI) for  $\text{C}_{14}\text{H}_{30}\text{N}$ , calcd. 212.2378, found 212.2375  $[\text{M}+\text{H}]^+$ .

**3o**, N-((4-isopropylcyclohexyl)methyl)pentan-1-amine, light yellow oil.  $^1\text{H}$  NMR (500 MHz,  $\text{CDCl}_3$ )  $\delta$  (ppm): 2.56–2.51 (t,  $J=7.2$  Hz, 2H, H-1'), 2.39 (d,  $J=6.7$  Hz, 2H, H-7), 1.94 (s, 1H, NH), 1.76 (d,  $J=12.0$  Hz, 2H, Ha-3, 5), 1.68 (d,  $J=7.7$  Hz, 2H, Ha-2, 6), 1.49–1.41 (m, 2H, H-2'), 1.40–1.33 (m, 1H, H-1), 1.29-1.24 (m, 5H, H-8, 3', 4'), 0.96-0.92 (m, 5H, He-2, 3, 5, 6, H-4), 0.86 (t,  $J=6.4$  Hz, 3H, H-5'), 0.82 (s, 3H, H-9), 0.81 (s, 3H, H-10).  $^{13}\text{C}$  NMR (126 MHz,  $\text{CDCl}_3$ )  $\delta$  (ppm): 56.78 (C-7), 50.18 (C-1'), 44.26 (C-4), 37.99 (C-1), 32.88 (C-8), 31.58 (C-3, 5), 29.69 (C-2'), 29.59 (C-3'), 29.37 (C-2, 6), 22.61 (C-4'), 19.81 (C-9, 10), 14.03 (C-5'). FT-IR( $\nu/\text{cm}^{-1}$ ): 2954, 2917, 2851 (s,  $\nu_{\text{C-H}}$ ); 1447 (s,  $\delta_{\text{C-H}}$  of aliphatic chain); 1383 (w,  $\delta_{\text{C-N}}$ ); 1128 (m,  $\nu_{\text{C-N}}$ ); 729 (m,  $\nu_{\text{C-C}}$ ). HRMS (ESI) for  $\text{C}_{15}\text{H}_{32}\text{N}$ , calcd. 226.2535, found 226.2532  $[\text{M}+\text{H}]^+$ .

**3p**, N-((4-isopropylcyclohexyl)methyl)hexan-1-amine, light yellow oil.  $^1\text{H}$  NMR (500 MHz,  $\text{CDCl}_3$ )  $\delta$  (ppm): 2.53 (t,  $J=7.2$  Hz, 2H, H-1'), 2.39 (d,  $J=6.7$  Hz, 2H, H-7), 1.76 (d,  $J=12.3$  Hz, 2H, Ha-3, 5), 1.69 (d,  $J=8.1$  Hz, 2H, Ha-2, 6), 1.45–1.41 (m, 2H, H-2'), 1.38-1.35 (m, 1H, H-1), 1.26 (s, 7H, H-8, 3', 4', 5'), 1.19 (s, 1H, NH), 0.96-0.89 (m, 5H, He-2, 3, 5, 6, H-4), 0.86 (t,  $J=6.1$  Hz, 3H, H-6'), 0.83 (s, 3H, H-9), 0.81 (s, 3H, H-10).  $^{13}\text{C}$  NMR (126 MHz,  $\text{CDCl}_3$ )  $\delta$  (ppm): 56.95 (C-7), 50.37 (C-1'), 44.38 (C-4), 38.15 (C-1), 33.00 (C-8), 31.91 (C-4'), 31.71 (C-3, 5), 30.16 (C-2'), 29.49 (C-2, 6), 27.20 (C-3'), 22.73 (C-5'), 19.93 (C-9, 10), 14.14 (C-6'). FT-IR( $\nu/\text{cm}^{-1}$ ): 2954, 2918, 2851 (s,  $\nu_{\text{C-H}}$ ); 1447 (s,  $\delta_{\text{C-H}}$  of aliphatic chain); 1366 (w,  $\delta_{\text{C-N}}$ ); 1129 (m,  $\nu_{\text{C-N}}$ ); 725 (m,  $\nu_{\text{C-C}}$ ). HRMS (ESI) for  $\text{C}_{16}\text{H}_{34}\text{N}$ , calcd. 240.2691, found 240.2692  $[\text{M}+\text{H}]^+$ .

**3q**, N-((4-isopropylcyclohexyl)methyl)heptan-1-amine, light yellow oil.  $^1\text{H}$  NMR (500 MHz,  $\text{CDCl}_3$ )  $\delta$  (ppm): 2.57-2.51 (m 2H, H-1'), 2.40 (d,  $J=6.7$  Hz, 2H, H-7), 1.77 (d,  $J=11.8$  Hz, 2H, Ha-3, 5), 1.69 (d,  $J=7.8$  Hz, 2H, Ha-2, 6), 1.48–1.41 (m, 3H, H-1, 2'), 1.41–1.33 (m, 1H, H-8), 1.26 (s, 9H, H-4, 3', 4', 5', 6'), 1.00–0.89 (m, 4H, He-2, 3, 5, 6), 0.86 (t,  $J=6.1$  Hz, 3H, H-7'), 0.83 (s, 3H, H-9), 0.82 (s, 3H, H-10).  $^{13}\text{C}$  NMR (126 MHz,  $\text{CDCl}_3$ )  $\delta$  (ppm): 57.07 (C-7), 50.46 (C-1'), 44.42 (C-4), 38.30 (C-1), 33.03 (C-8), 31.96 (C-5'), 31.75 (C-3, 5), 30.34 (C-2'), 29.53 (C-2, 6), 29.39 (C-4'), 27.51 (C-3'), 22.74 (C-6'), 19.96 (C-9, 10), 14.19 (C-7'). FT-IR( $\nu/\text{cm}^{-1}$ ): 2954, 2919, 2805 (s,  $\nu_{\text{C-H}}$ ); 1448 (s,  $\delta_{\text{C-H}}$  of aliphatic chain); 1366 (w,  $\delta_{\text{C-N}}$ ); 1129 (m,  $\nu_{\text{C-N}}$ ); 724 (m,  $\nu_{\text{C-C}}$ ). HRMS (ESI) for  $\text{C}_{17}\text{H}_{36}\text{N}$ , calcd. 254.2848, found 254.2847  $[\text{M}+\text{H}]^+$ .

**3r**, N-((4-isopropylcyclohexyl)methyl)octan-1-amine, light yellow oil.  $^1\text{H}$  NMR (500 MHz,  $\text{CDCl}_3$ )  $\delta$  (ppm): 2.56 (t,  $J=7.2$  Hz, 2H, H-1'), 2.42 (d,  $J=6.7$  Hz, 2H, H-7), 1.79 (d,  $J=11.5$  Hz, 2H, Ha-3, 5), 1.72 (d,  $J=9.6$  Hz, 2H, Ha-2, 6), 1.47-1.42 (m, 3H, H-1, H-2'), 1.42-1.38 (m, 1H, H-8), 1.28 (s, 11H, H-4, 3', 4', 5', 6', 7'), 1.02–0.91 (m, 4H, He-2, 3, 5, 6), 0.89 (t,  $J=6.7$  Hz, 3H, H-8'), 0.86 (s, 3H, H-9), 0.84 (s, 3H, H-10).  $^{13}\text{C}$  NMR (126 MHz,  $\text{CDCl}_3$ )  $\delta$  (ppm): 56.93 (C-7), 50.32 (C-1'), 44.31 (C-4), 38.15 (C-1), 32.92 (C-8), 31.85 (C-5'), 31.64 (C-3, 5), 30.18 (C-2'), 29.42 (C-2, 6), 29.29 (C-3'), 27.44 (C-6'), 22.67 (C-7'), 19.85 (C-9, 10), 14.10 (C-8'). FT-IR( $\nu/\text{cm}^{-1}$ ): 2954, 2919, 2851 (s,  $\nu_{\text{C-H}}$ ); 1447 (s,  $\delta_{\text{C-H}}$  of aliphatic

chain); 1366 (m,  $\nu_{C-N}$ ); 1130 (m,  $\delta_{C-N}$ ); 722 (m,  $\nu_{C-C}$ ). HRMS (ESI) for  $C_{18}H_{38}N$ , calcd. 268.3004, found 268.3004  $[M+H]^+$ .

**3s**, N-((4-isopropylcyclohexyl)methyl)-2-methylpropan-1-amine, light yellow oil.  $^1H$  NMR (500 MHz,  $CDCl_3$ )  $\delta$  (ppm): 2.41 (d,  $J=6.7$  Hz, 2H, H-1'), 2.38 (d,  $J=6.8$  Hz, 2H, H-7), 1.83–1.76 (m, 2H, Ha-3, 5), 1.75–1.71 (m, 3H, Ha-2, 6, H-2'), 1.46–1.36 (m, 2H, H-1, 8), 0.99–0.93 (m, 5H, He-2, 3, 5, 6, H-4), 0.90 (s, 3H, H-9), 0.89 (s, 3H, H-10), 0.86 (s, 3H, H-3'), 0.84 (s, 3H, H-4').  $^{13}C$  NMR (126 MHz,  $CDCl_3$ )  $\delta$  (ppm): 58.36 (C-1'), 57.01 (C-7), 44.41 (C-4), 38.17 (C-1), 33.00 (C-8), 31.70 (C-3, 5), 29.50 (C-2, 6), 28.27 (C-2'), 20.75 (C-9, 10), 19.92 (C-3', 4'). FT-IR( $\nu/cm^{-1}$ ): 2953, 2914, 2869 (s,  $\nu_{C-H}$ ); 1463, 1447 (s,  $\delta_{C-H}$  of aliphatic chain); 1384 (m,  $\nu_{C-N}$ ); 1128 (m,  $\delta_{C-N}$ ); 743 (m,  $\nu_{C-C}$ ). HRMS (ESI) for  $C_{14}H_{30}N$ , calcd. 212.2378, found 212.2380  $[M+H]^+$ .

**3t**, N-((4-isopropylcyclohexyl)methyl)-3-methylbutan-1-amine, light yellow oil.  $^1H$  NMR (500 MHz,  $CDCl_3$ )  $\delta$  (ppm): 2.58 (t,  $J=7.2$  Hz, 2H, H-1'), 2.43 (d,  $J=6.7$  Hz, 2H, H-7), 1.79 (d,  $J=11.7$  Hz, 2H, Ha-3, 5), 1.72 (d,  $J=9.5$  Hz, 2H, Ha-2, 6), 1.61 (dt,  $J=13.4, 6.7$  Hz, 2H, H-3'), 1.40–1.35 (m, 4H, H-1, 8, 2'), 1.03 – 0.92 (m, 5H, He-2, 3, 5, 6, H-4), 0.90 (s, 3H, H-9), 0.89 (s, 3H, H-10), 0.86 (s, 3H, H-4'), 0.84 (s, 3H, H-5').  $^{13}C$  NMR (126 MHz,  $CDCl_3$ )  $\delta$  (ppm): 57.01 (C-7), 48.40 (C-1'), 44.29 (C-4), 39.25 (C-2'), 38.14 (C-1), 32.90 (C-8), 31.62 (C-3, 5), 29.40 (C-2, 6), 26.24 (C-3'), 22.69 (C-4', 5'), 19.83 (C-9, 10). FT-IR( $\nu/cm^{-1}$ ): 2953, 2913, 2868 (s,  $\nu_{C-H}$ ); 1464, 1447 (s,  $\delta_{C-H}$  of aliphatic chain); 1366 (w,  $\nu_{C-N}$ ); 1127 (m,  $\delta_{C-N}$ ); 735 (m,  $\nu_{C-C}$ ). HRMS (ESI) for  $C_{15}H_{32}N$ , calcd. 226.2535, found 226.2535  $[M+H]^+$ .

**3u**, N-((4-isopropylcyclohexyl)methyl)cyclohexanamine, light yellow oil.  $^1H$  NMR (500 MHz,  $CDCl_3$ )  $\delta$  (ppm): 2.40 (d,  $J=6.7$  Hz, 2H, H-7), 2.36–2.28 (m, 1H, H-1'), 1.82 (d,  $J=10.5$  Hz, 2H, Ha-3, 5), 1.75 (d,  $J=11.9$  Hz, 2H, Ha-2, 6), 1.67 (d,  $J=9.5$  Hz, 4H, Ha-2', 6', H-4'), 1.60 (s, 1H, NH), 1.44–1.27 (m, 3H, H-1, He-2', 6'), 1.17 (m, 3H, H-8, Ha-3', 5'), 1.04 (dd,  $J=24.7, 12.4$  Hz, 3H, H-4, He-3', 5'), 0.98–0.84 (m, 4H, He-2, 3, 5, 6), 0.82 (s, 3H, H-9), 0.80 (s, 3H, H-10).  $^{13}C$  NMR (126 MHz,  $CDCl_3$ )  $\delta$  (ppm): 56.92 (C-1'), 53.83 (C-7), 44.30 (C-4), 38.38 (C-1), 33.67 (C-2', 6'), 32.89 (C-8), 31.68 (C-3, 5), 29.39 (C-2, 6), 26.22 (C-4'), 25.12 (C-3', 5'), 19.83 (C-9, 10). FT-IR( $\nu/cm^{-1}$ ): 2919, 2849 (s,  $\nu_{C-H}$ ); 1447 (s,  $\delta_{C-H}$ ); 1366 (m,  $\nu_{C-N}$ ); 1129 (m,  $\delta_{C-N}$ ); 733 (m,  $\nu_{C-C}$ ). HRMS (ESI) for  $C_{16}H_{32}N$ , calcd. 238.2535, found 238.2533  $[M+H]^+$ .

**3v**, (*1R, 2R*)-N-((4-isopropylcyclohexyl)methyl)-2-methylcyclohexan-1-amine, light yellow oil.  $^1H$  NMR (500 MHz,  $CDCl_3$ )  $\delta$  (ppm): 2.48 (dd,  $J=11.3, 6.7$  Hz, 1H, Ha-7), 2.29 (dd,  $J=11.4, 6.5$  Hz, 1H, He-7), 1.99–1.88 (m, 2H, Ha-3, 5), 1.82–1.73 (m, 2H, Ha-2, 6), 1.69 (d,  $J=6.8$  Hz, 3H, H-1', Ha-3', 6'), 1.60 (dd,  $J=12.4, 4.8$  Hz, 2H, H-1, 2'), 1.47–1.34 (m, 2H, H-4'), 1.34–1.23 (m, 3H, H-8, He-3', 6'), 1.19 (t,  $J=11.1$  Hz, 3H, H-4, 5'), 0.99–0.96 (m, 4H, He-2, 3, 5, 6), 0.92 (d,  $J=6.5$  Hz, 3H,  $\underline{CH_3}$ ), 0.83 (s, 3H, H-9), 0.81 (s, 3H, H-10).  $^{13}C$  NMR (126 MHz,  $CDCl_3$ )  $\delta$  (ppm): 63.09 (C-1'), 53.81 (C-7), 44.34 (C-4), 38.42 (C-1), 37.79 (C-2'), 34.67 (C-3'), 32.90 (C-8), 32.30 (C-6'), 31.71 (C-3), 31.68 (C-5), 29.44 (C-2), 29.41 (C-6), 26.08 (C-4'), 25.61 (C-5'), 19.84 (C-9, 10), 19.27 ( $\underline{CH_3}$ ). FT-IR( $\nu/cm^{-1}$ ): 2916, 2850 (s,  $\nu_{C-H}$ ); 1446 (s,  $\delta_{C-H}$ ); 1366 (m,  $\nu_{C-N}$ ); 1126 (m,  $\delta_{C-N}$ ); 706 (m,  $\nu_{C-C}$ ). HRMS (ESI) for  $C_{17}H_{34}N$ , calcd. 252.2691, found 252.2691  $[M+H]^+$ .

**3w**, (1R, 4R)-N-((4-isopropylcyclohexyl)methyl)-4-methylcyclohexan-1-amine, light yellow oil. <sup>1</sup>H NMR (500 MHz, CDCl<sub>3</sub>) δ (ppm): 2.44 (d, *J*=6.7 Hz, 2H, H-7), 2.36–2.27 (m, 1H, H-1'), 1.88 (d, *J*=11.4 Hz, 2H, Ha-3, 5), 1.79 (d, *J*=11.7 Hz, 2H, Ha-2, 6), 1.69 (d, *J*=11.3 Hz, 5H, Ha-2', 3', 5', 6', H-4'), 1.42–1.27 (m, 2H, H-1, 8), 1.07 (d, *J*=11.3 Hz, 4H, He-2', 3', 5', 6'), 0.99–0.92 (m, 5H, He-2, 3, 5, 6, H-4), 0.87 (d, *J*=6.5 Hz, 3H, CH<sub>3</sub>), 0.86 (s, 3H, H-9), 0.84 (s, 3H, H-10). <sup>13</sup>C NMR (126 MHz, CDCl<sub>3</sub>) δ (ppm): 57.04 (C-1'), 53.98 (C-7), 44.31 (C-4), 38.37 (C-1), 34.04 (C-3', 5'), 33.57 (C-2', 6'), 32.90 (C-4'), 32.54 (C-8), 31.69 (C-3, 5), 29.40 (C-2, 6), 22.33 (CH<sub>3</sub>), 19.84 (C-9, 10). FT-IR(*ν*/cm<sup>-1</sup>): 2913, 2846 (s, *ν*<sub>C-H</sub>); 1447 (s, *δ*<sub>C-H</sub>); 1367 (m, *ν*<sub>C-N</sub>); 1131 (m, *δ*<sub>C-N</sub>); 739 (w, *ν*<sub>C-C</sub>). HRMS (ESI) for C<sub>17</sub>H<sub>34</sub>N, calcd. 252.2691, found 252.2688 [M+H]<sup>+</sup>.

**3x**, 4-isopropyl-N-((4-isopropylcyclohexyl)methyl)-1-methylcyclohex-3-en-1-amine, light yellow oil. <sup>1</sup>H NMR (400 MHz, CDCl<sub>3</sub>) δ (ppm): <sup>1</sup>H NMR (500 MHz, CDCl<sub>3</sub>) δ (ppm) 5.30 (s, 1H, H-3'), 2.42–2.28 (m, 2H, H-7), 2.19 (dt, *J*=13.7, 6.9 Hz, 1H, H-8'), 2.05–1.88 (m, 4H, H-2', 5'), 1.80 (d, *J*=9.3 Hz, 2H, Ha-2, 6), 1.71 (d, *J*=9.0 Hz, 2H, Ha-3, 5), 1.65 (dd, *J*=13.0, 6.3 Hz, 1H, Ha-6'), 1.48 (dt, *J*=13.2, 6.7 Hz, 1H, He-6'), 1.39 (dd, *J*=11.0, 6.5 Hz, 1H, H-8), 1.34–1.23 (m, 1H, H-1), 1.04 (s, 3H, H-7'), 0.99 (d, *J*=6.9 Hz, 8H, He-2, 6, H-9', 10'), 0.97–0.86 (m, 3H, He-3, 5, H-4), 0.85 (s, 3H, H-9), 0.83 (s, 3H, H-10). <sup>13</sup>C NMR (126 MHz, CDCl<sub>3</sub>) δ (ppm) 142.57 (C-4'), 116.59 (C-3'), 50.15 (C-1'), 48.50 (C-7), 44.35 (C-4), 38.92 (C-2'), 38.23 (C-1), 34.82 (C-6'), 32.99 (C-8'), 32.90 (C-8), 31.89 (C-3), 31.76 (C-5), 29.45 (C-2), 29.42 (C-6), 24.75 (C-7'), 23.37 (C-5'), 21.56 (C-9'), 21.50 (C-10'), 19.87 (C-9, 10). FT-IR(*ν*/cm<sup>-1</sup>): 2956, 2912, 2869 (s, *ν*<sub>C-H</sub>); 1466 (s, *δ*<sub>N-H</sub>); 1447 (s, *δ*<sub>C-H</sub>); 1366 (m, *δ*<sub>C-N</sub>); 1132 (s, *ν*<sub>C-N</sub>); 707 (m, *ν*<sub>C-C</sub>). HRMS (ESI) for C<sub>20</sub>H<sub>38</sub>N, calcd. 292.3004, found 292.3001 [M+H]<sup>+</sup>.

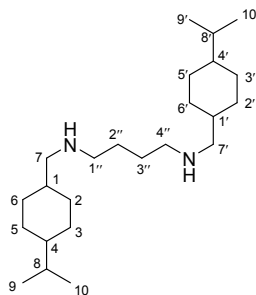

**3y**

**3y**, N<sup>1</sup>, N<sup>4</sup>-bis((4-isopropylcyclohexyl)methyl)butane-1,4-diamine, light yellow oil. <sup>1</sup>H NMR (500 MHz, CDCl<sub>3</sub>) δ (ppm): 2.62–2.59 (m, 4H, H-1'', 4''), 2.42 (d, *J*=6.7 Hz, 4H, H-7, 7'), 2.04 (s, 2H, NH), 1.78 (d, *J*=11.6 Hz, 4H, Ha-3, 5, 3', 5'), 1.72 (d, *J*=9.3 Hz, 4H, Ha-2, 6, 2', 6'), 1.52–1.38 (m, 8H, H-1, 8, 1', 8', 2'', 3''), 1.02–0.88 (m, 10H, He-2, 3, 5, 6, 2', 3', 5', 6', H-4, 4'), 0.86 (s, 6H, H-9, 9'), 0.84 (s, 6H, H-10, 10'). <sup>13</sup>C NMR (126 MHz, CDCl<sub>3</sub>) δ (ppm): 56.81 (C-7), 50.06 (C-1'', 4''), 44.27 (C-4, 4'), 38.10 (C-1, 1'), 32.89 (C-8, 8'), 31.60 (C-3, 5, 3', 5'), 29.38 (C-2, 6, 2', 6'), 27.92 (C-2'', 3''), 19.83 (C-9, 10, 9', 10'). FT-IR(*ν*/cm<sup>-1</sup>): 2914, 2849 (s, *ν*<sub>C-H</sub>); 1741 (s, *δ*<sub>N-H</sub>); 1447 (s, *δ*<sub>C-H</sub> of aliphatic chain); 1367 (m, *ν*<sub>C-N</sub>); 1137 (s, *δ*<sub>C-N</sub>); 737 (m, *ν*<sub>C-C</sub>). HRMS (ESI) for C<sub>24</sub>H<sub>49</sub>N<sub>2</sub>, calcd. 365.3896, found 365.3893 [M+H]<sup>+</sup>.



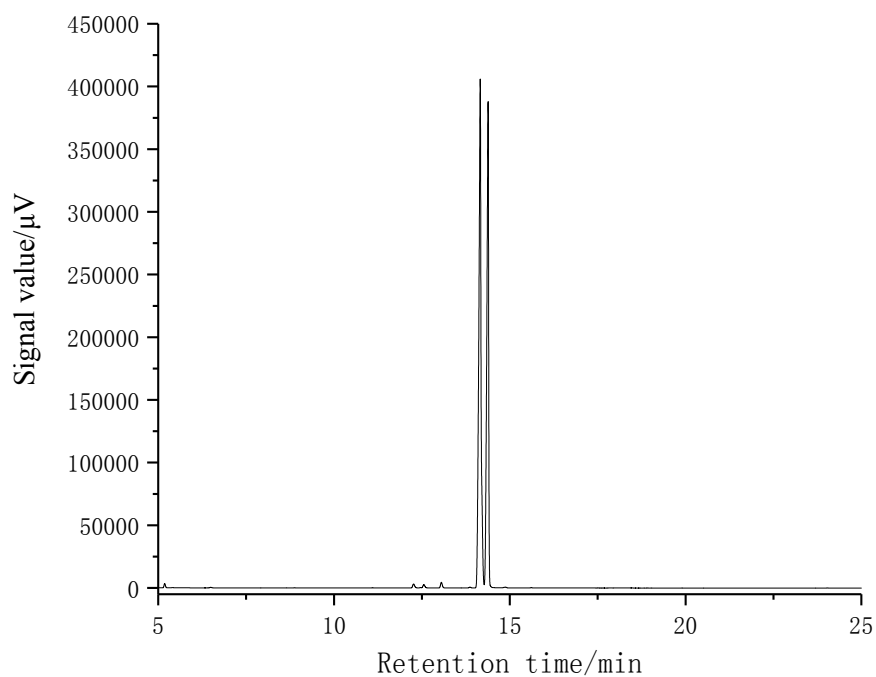

**Fig**

**re S1** The GC spectrum of compound **2**

**Table S2** The GC relative contents of isomer of compound **2**

| Peak# | Ret.Time | Aera      | Conc.    |
|-------|----------|-----------|----------|
| 1     | 12.264   | 12815.0   | 0.39297  |
| 2     | 12.555   | 10914.3   | 0.33469  |
| 3     | 13.054   | 16061.2   | 0.49252  |
| 4     | 14.159   | 1802396.0 | 55.27084 |
| 5     | 14.383   | 1409504.4 | 43.22274 |

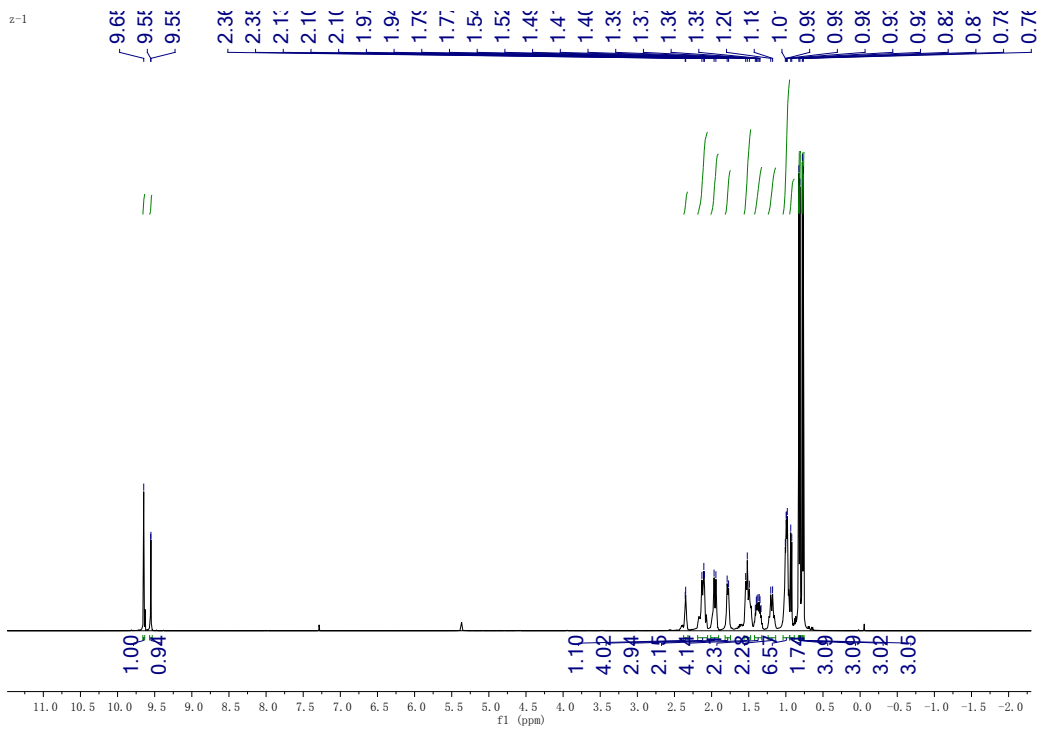

**Figure S2**  $^1\text{H}$  NMR spectrum of compound **2**

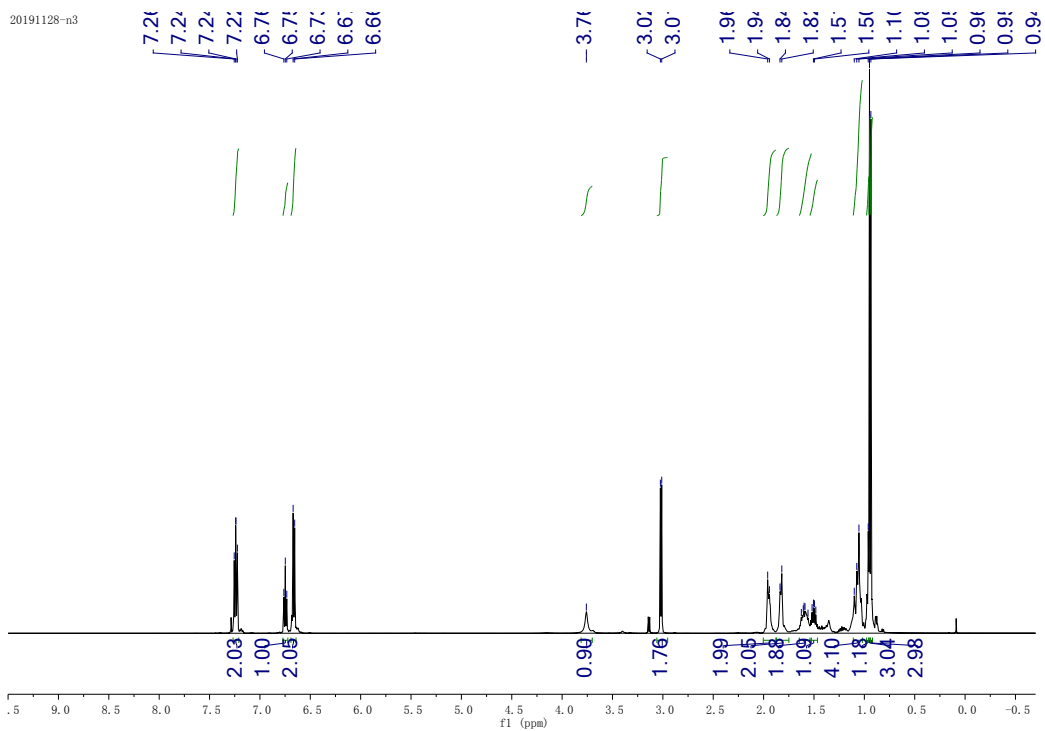

**Figure S3**  $^1\text{H}$  NMR spectrum of compound **3a**

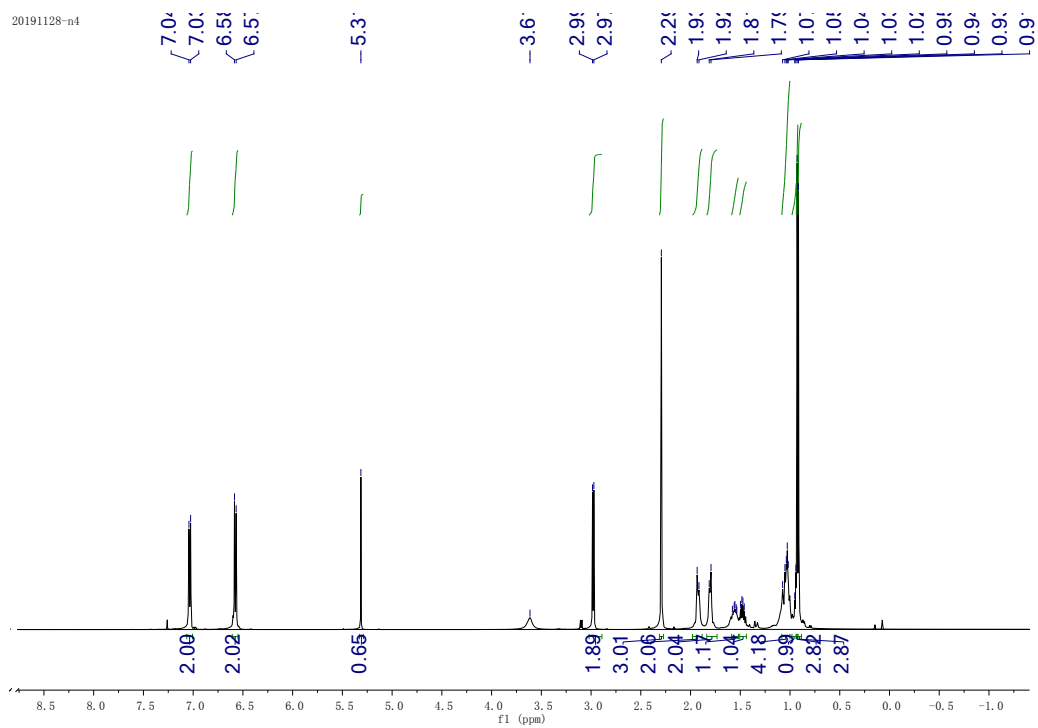

**Figure S4**  $^1\text{H}$  NMR spectrum of compound **3b**

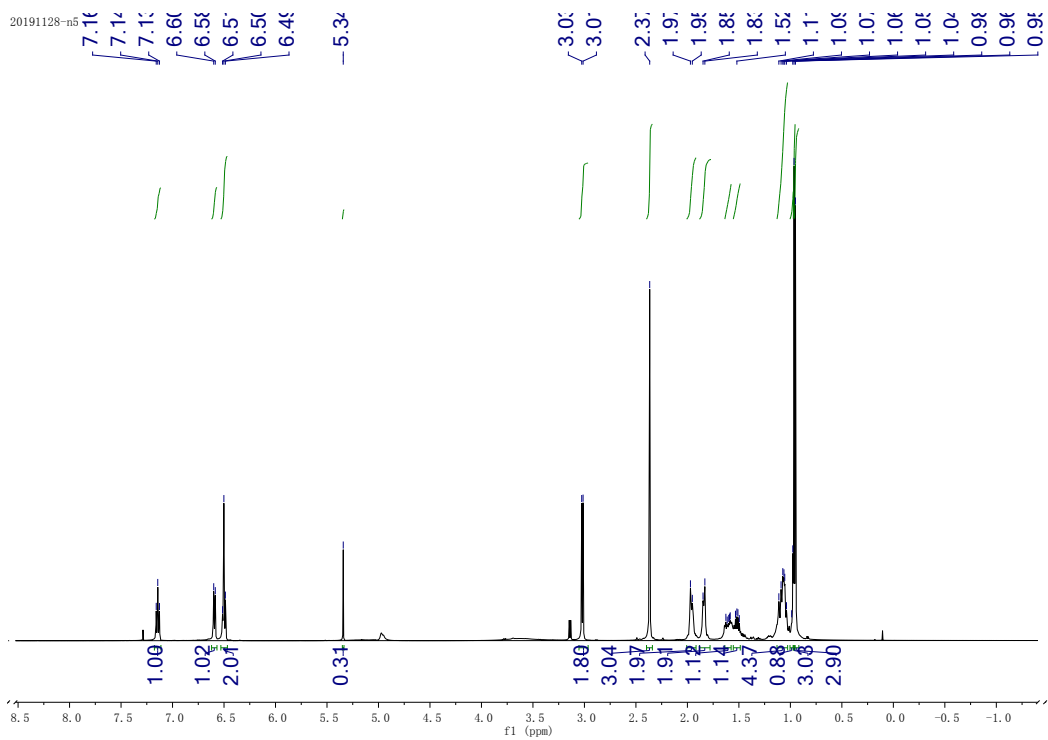

**Figure S5**  $^1\text{H}$  NMR spectrum of compound **3c**

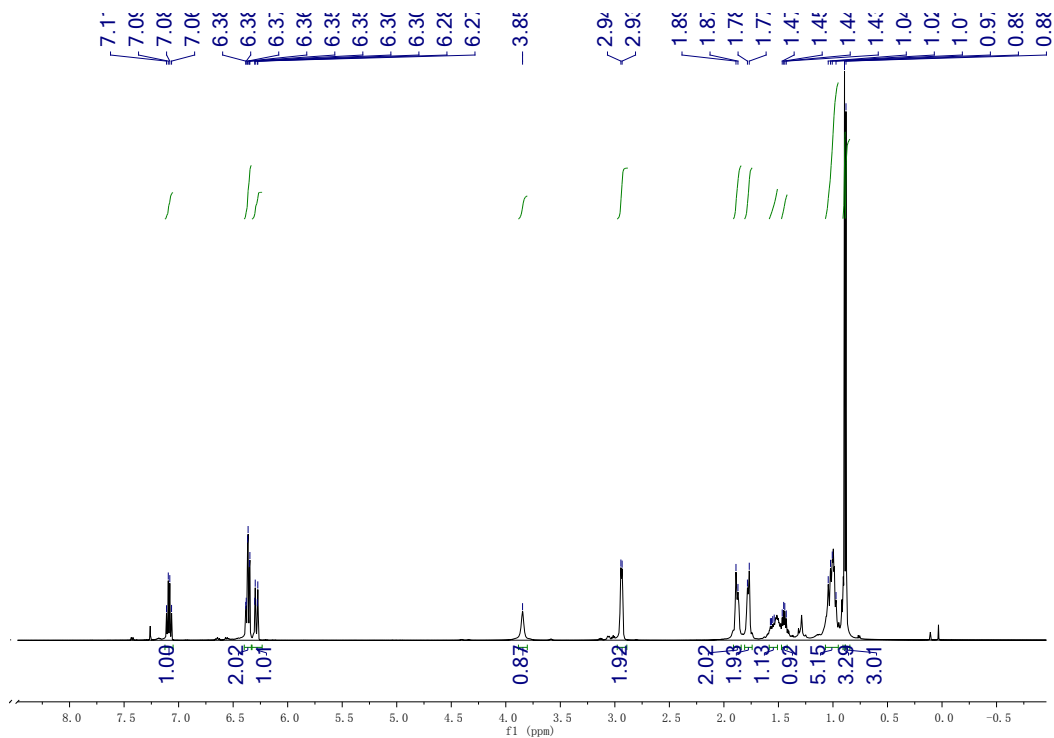

**Figure S6**  $^1\text{H}$  NMR spectrum of compound **3d**

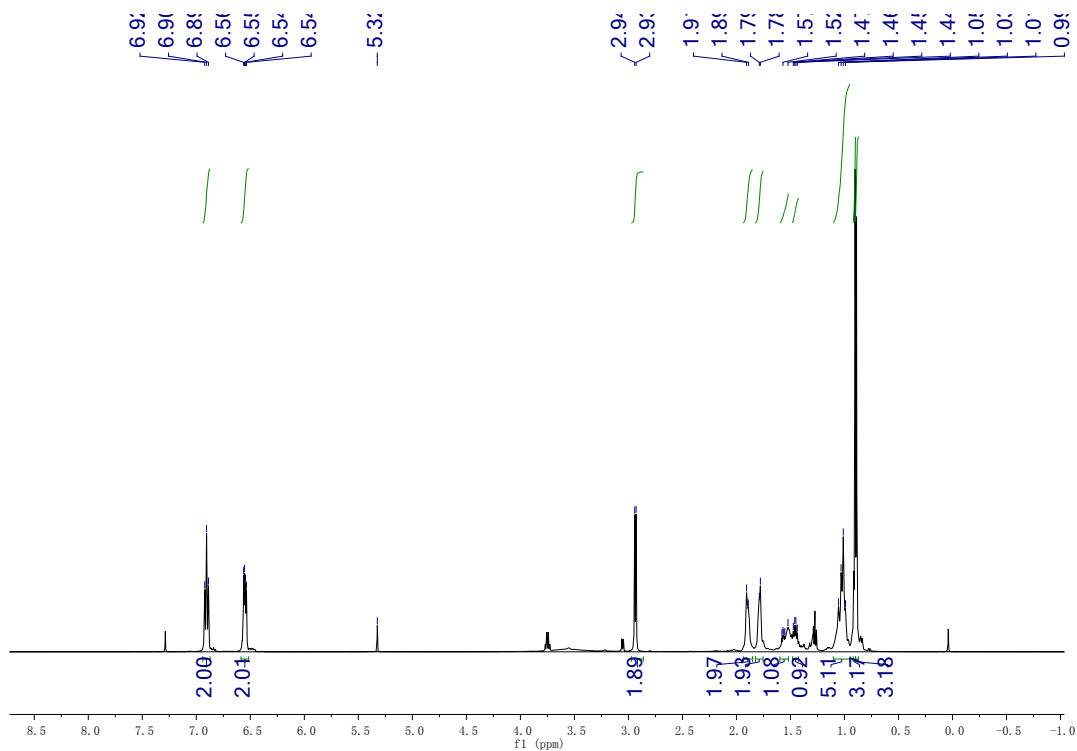

**Figure S7**  $^1\text{H}$  NMR spectrum of compound **3e**

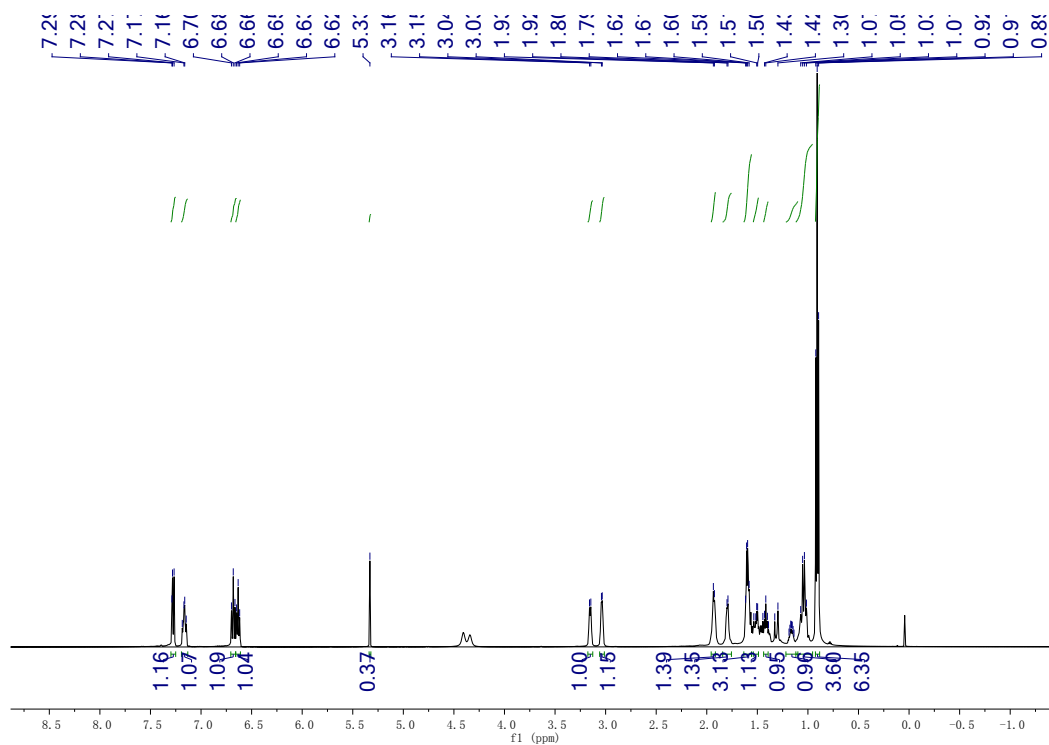

**Figure S8**  $^1\text{H}$  NMR spectrum of compound **3f**

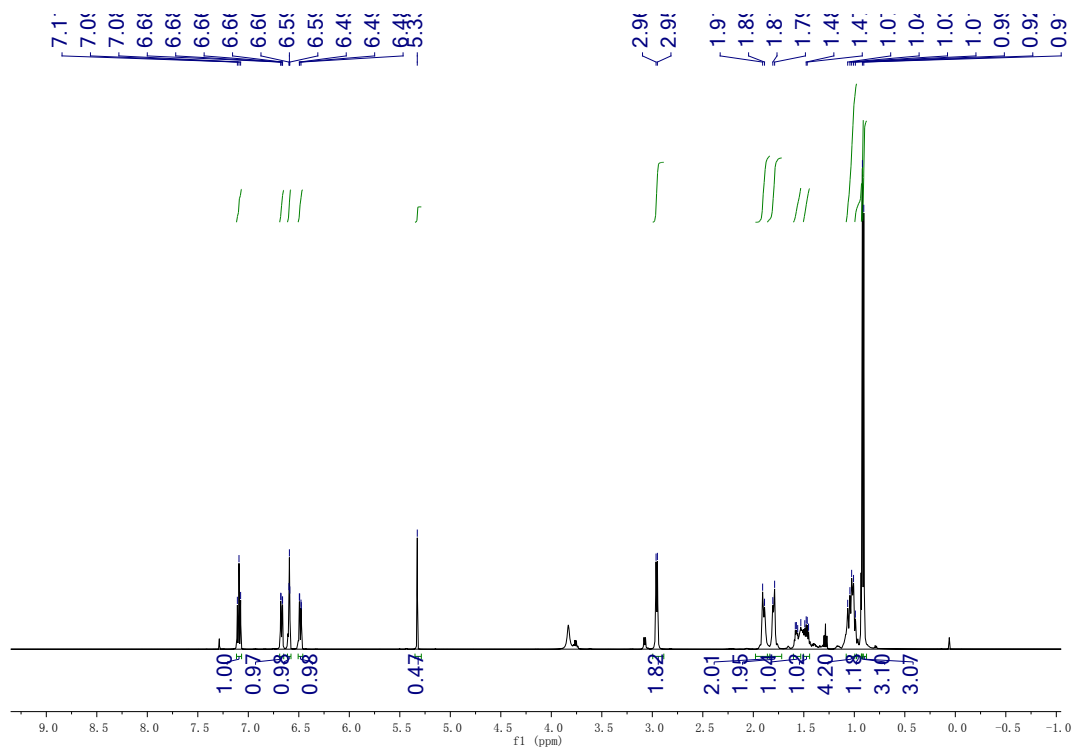

**Figure S9**  $^1\text{H}$  NMR spectrum of compound **3g**

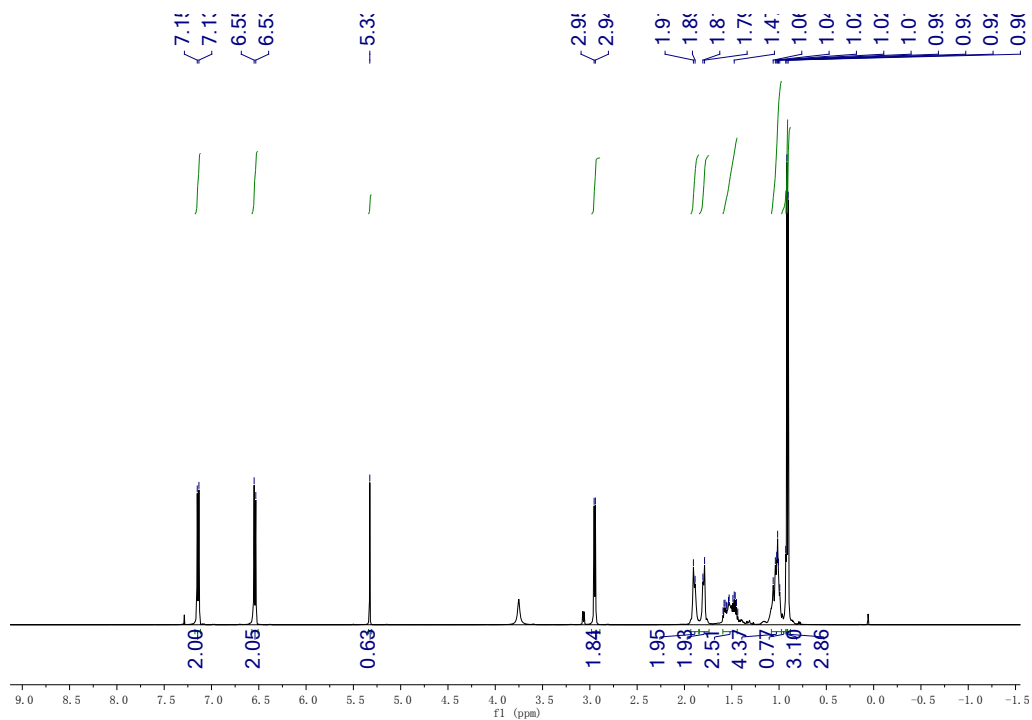

**Figure S10**  $^1\text{H}$  NMR spectrum of compound 3h

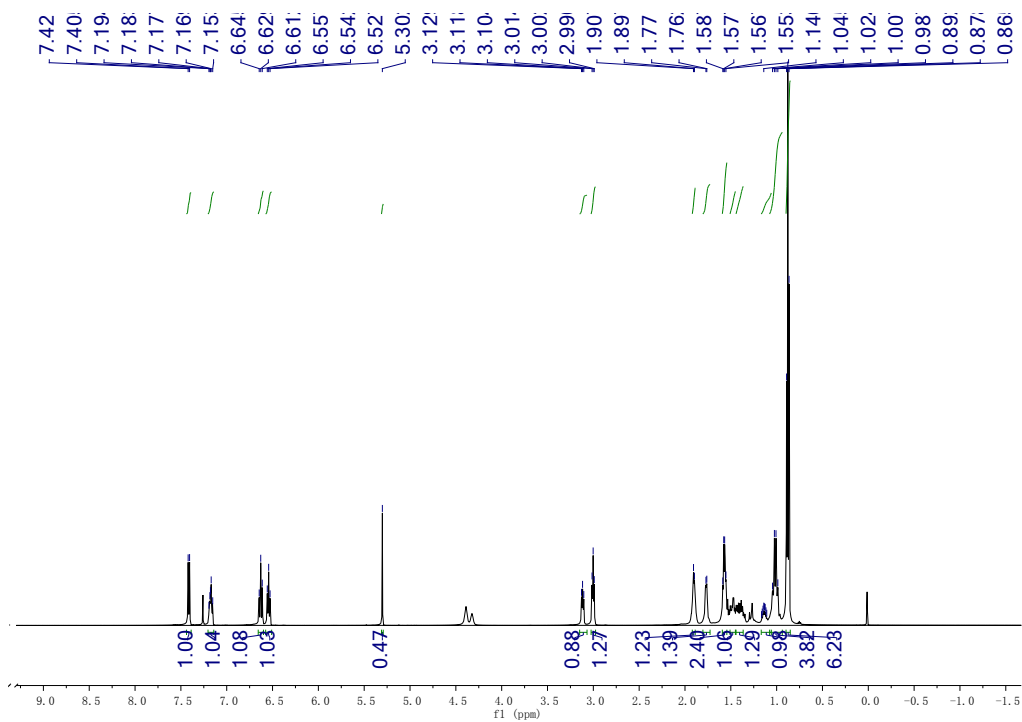

**Figure S11**  $^1\text{H}$  NMR spectrum of compound 3i

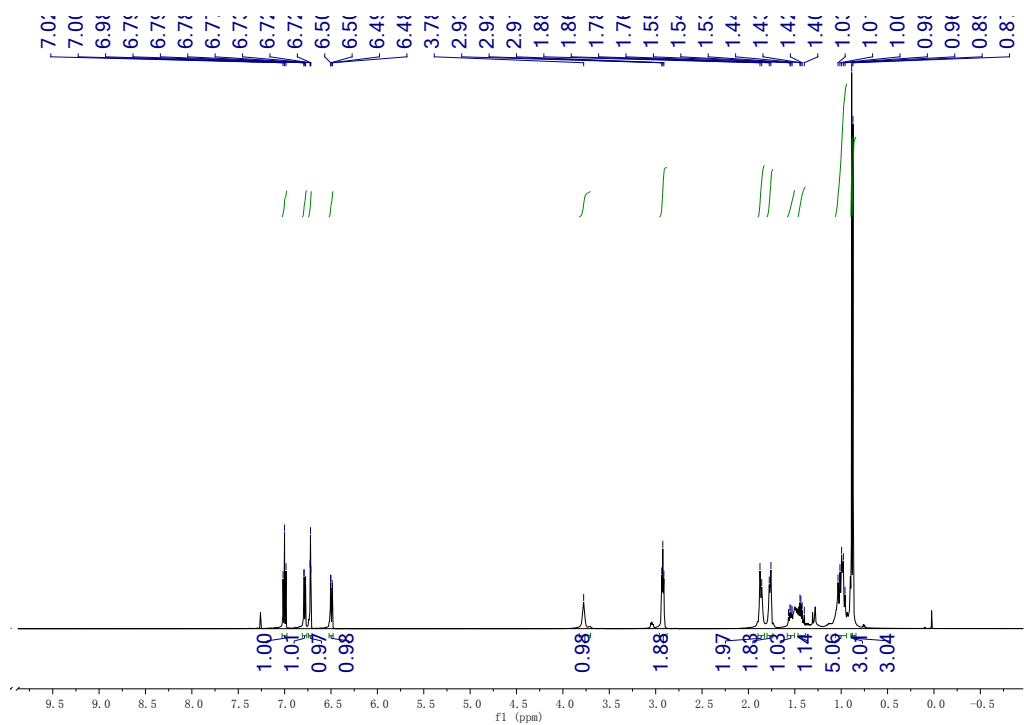

Figure S12 <sup>1</sup>H NMR spectrum of compound 3j

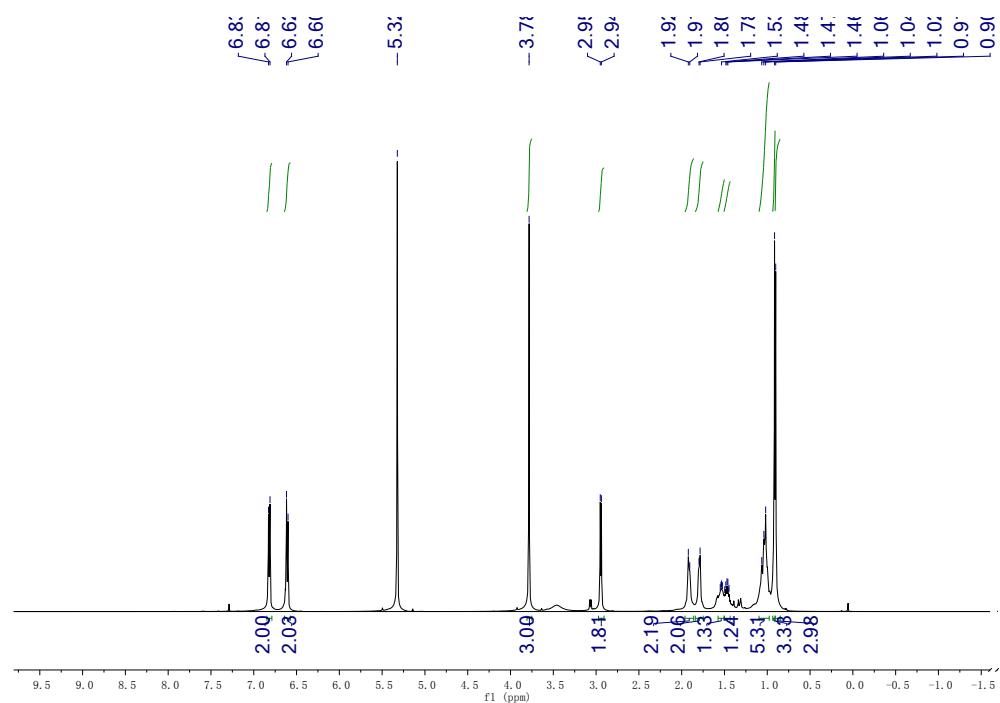

Figure S13 <sup>1</sup>H NMR spectrum of compound 3k

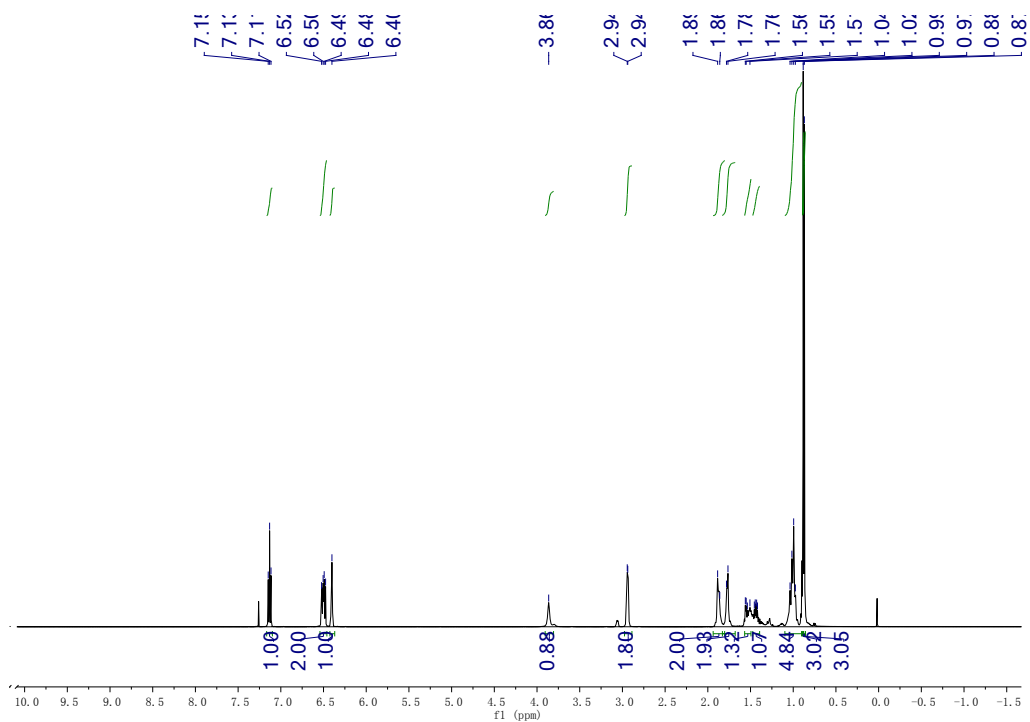

**Figure S14**  $^1\text{H}$  NMR spectrum of compound **3l**

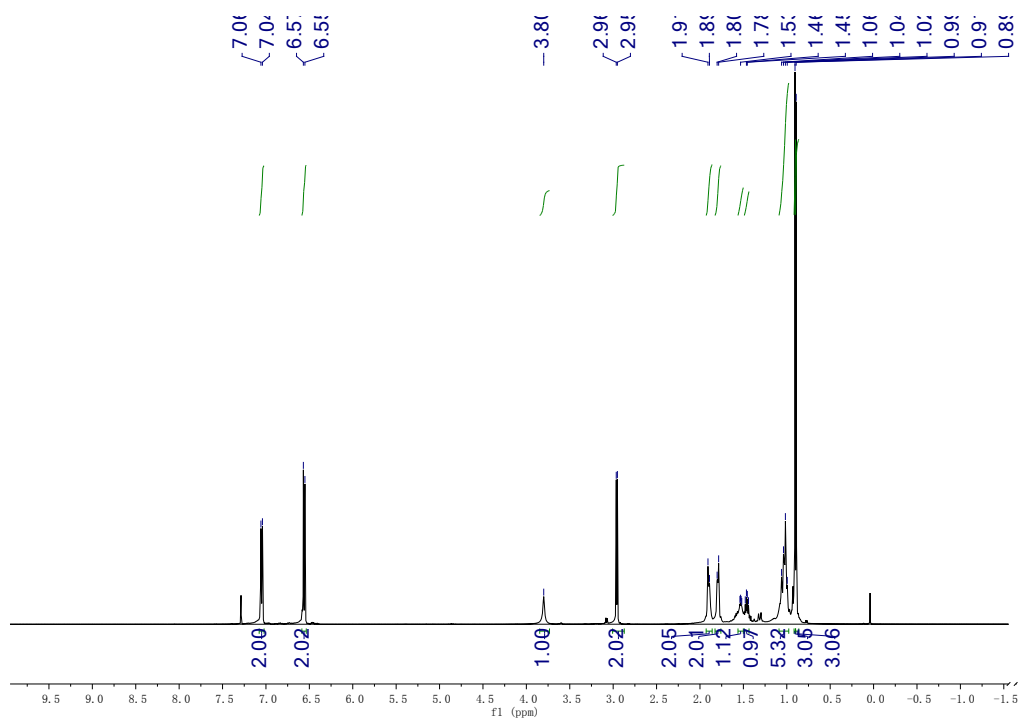

**Figure S15**  $^1\text{H}$  NMR spectrum of compound **3m**



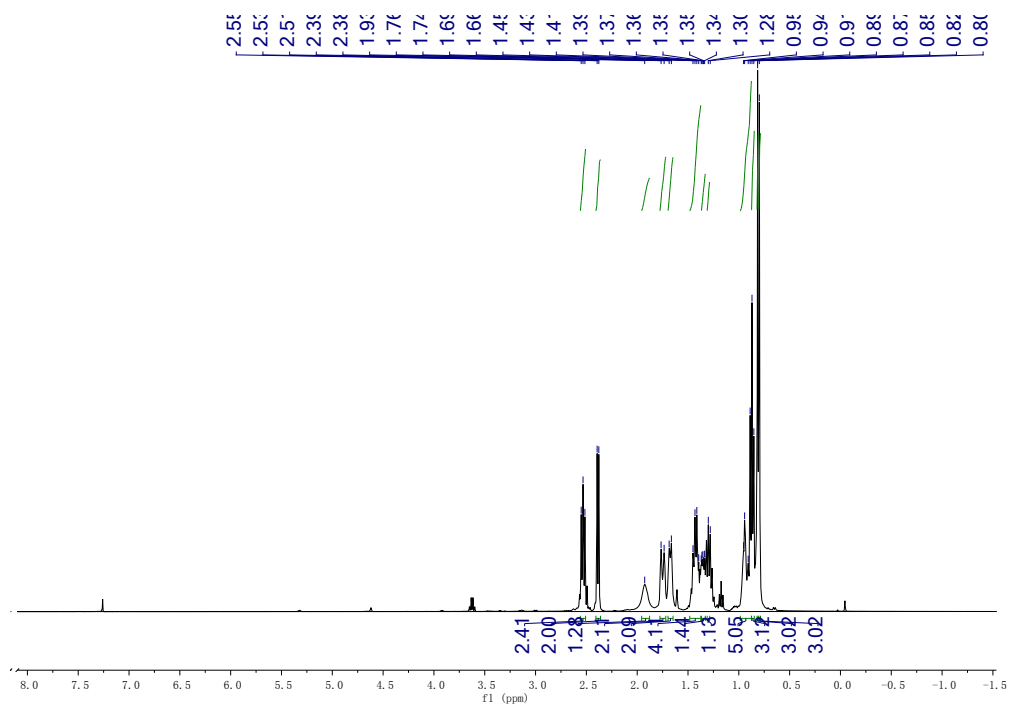

**Figure S16**  $^1\text{H}$  NMR spectrum of compound **3n**

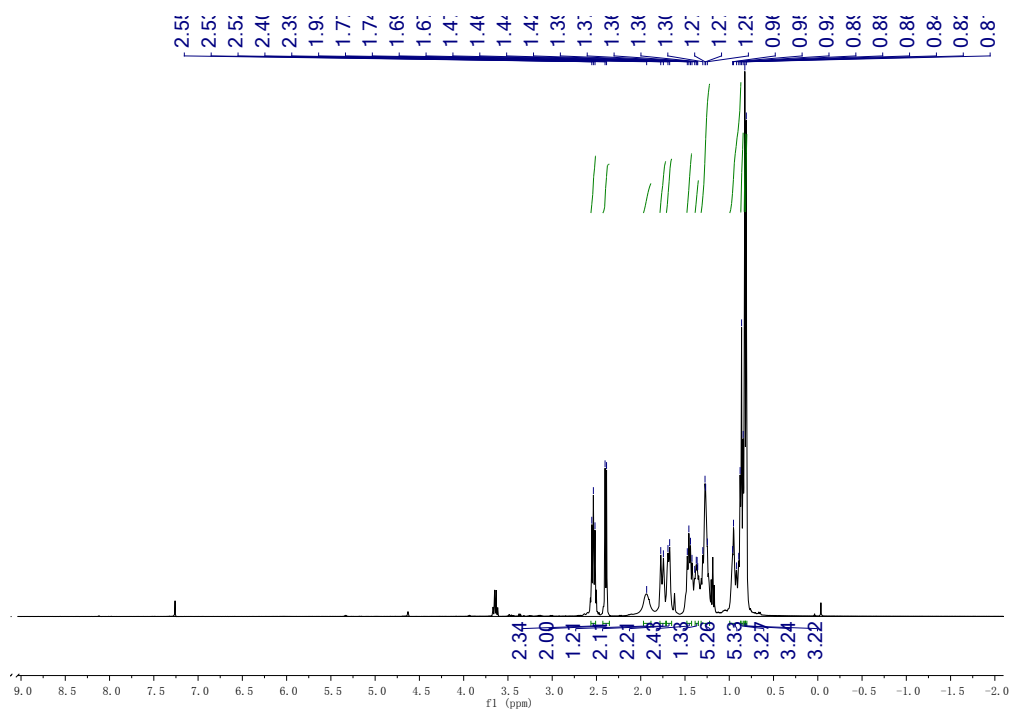

**Figure S17**  $^1\text{H}$  NMR spectrum of compound **3o**

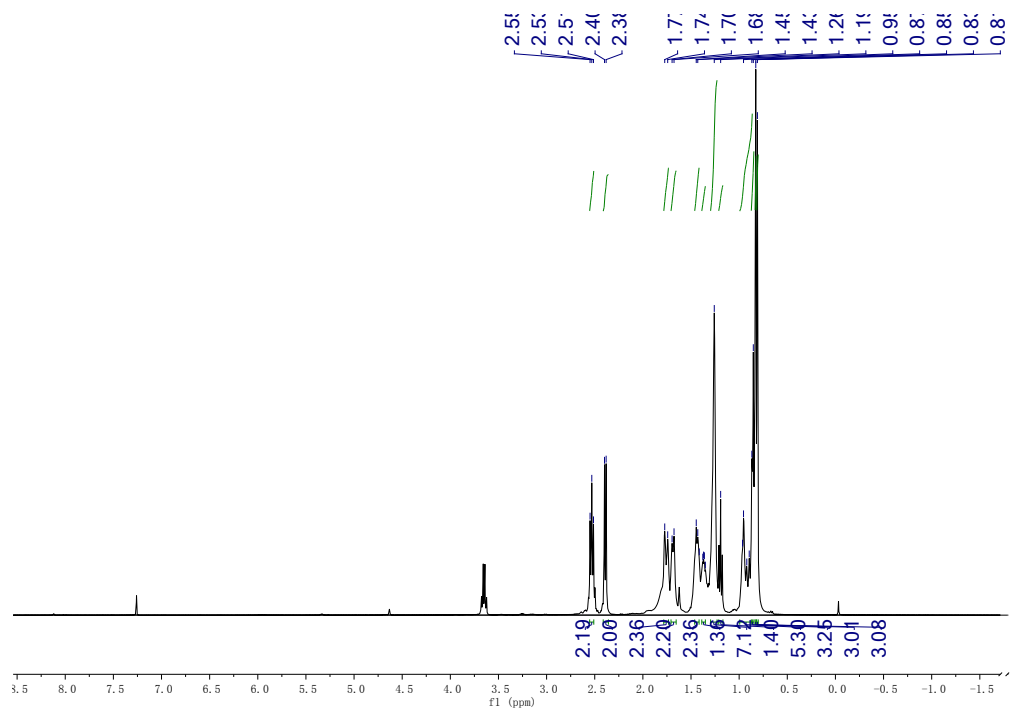

**Figure S18** <sup>1</sup>H NMR spectrum of compound **3p**

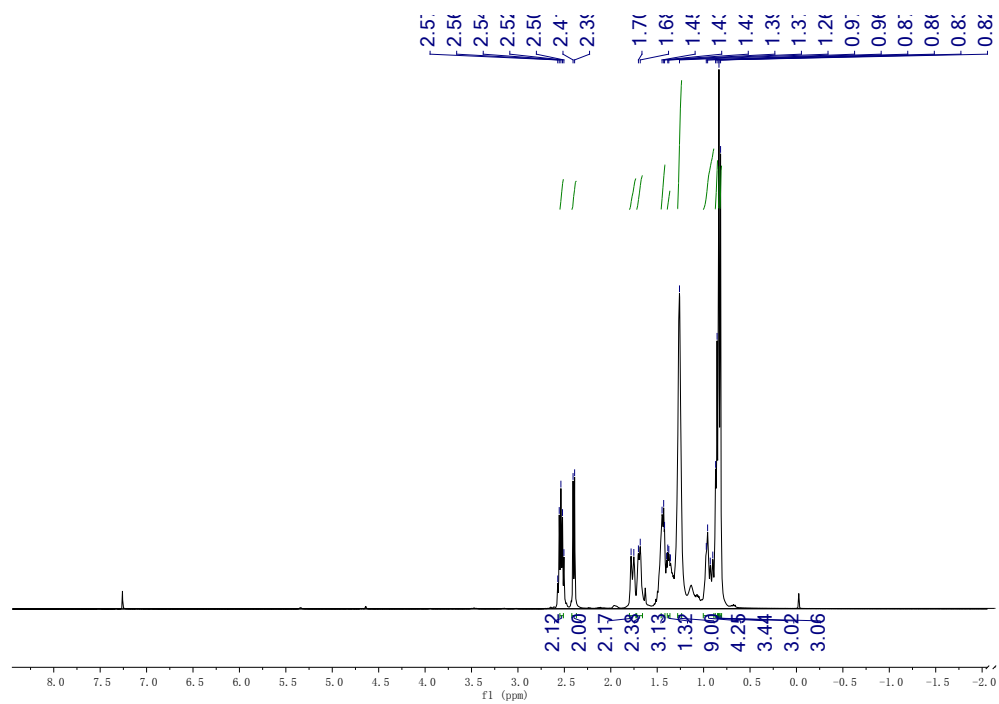

**Figure S19** <sup>1</sup>H NMR spectrum of compound **3q**

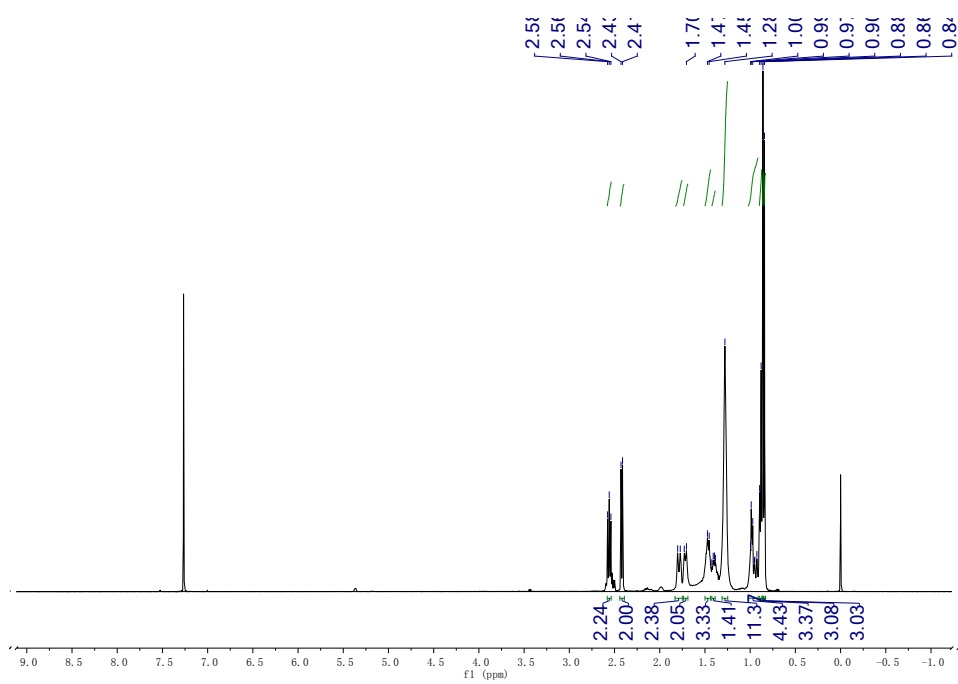

**Figure S20**  $^1\text{H}$  NMR spectrum of compound **3r**

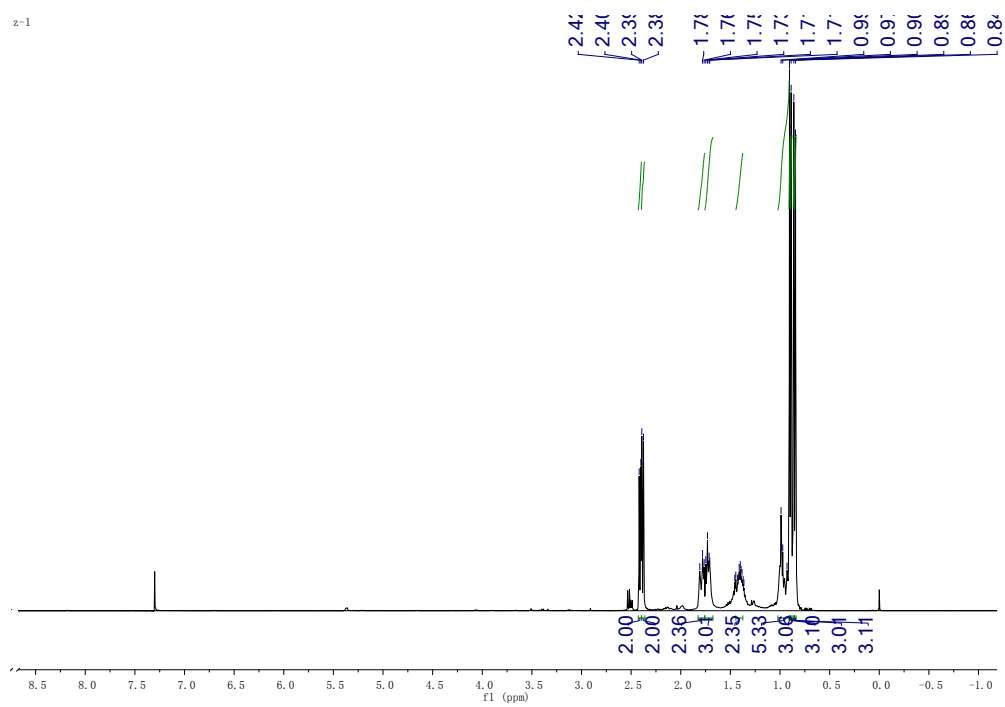

**Figure S21**  $^1\text{H}$  NMR spectrum of compound **3s**

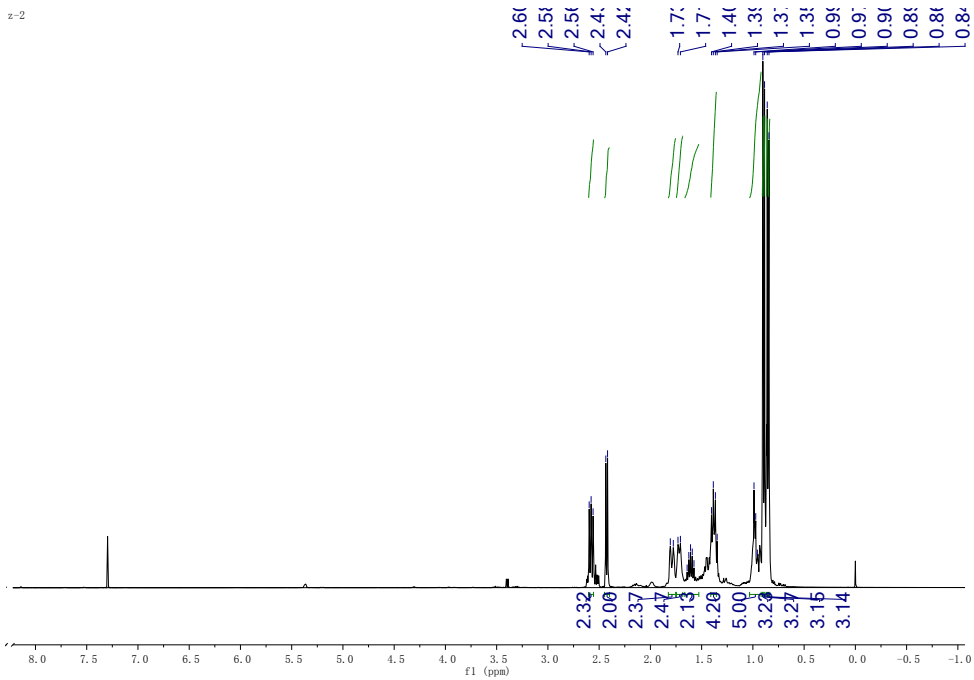

**Figure S22**  $^1\text{H}$  NMR spectrum of compound **3t**

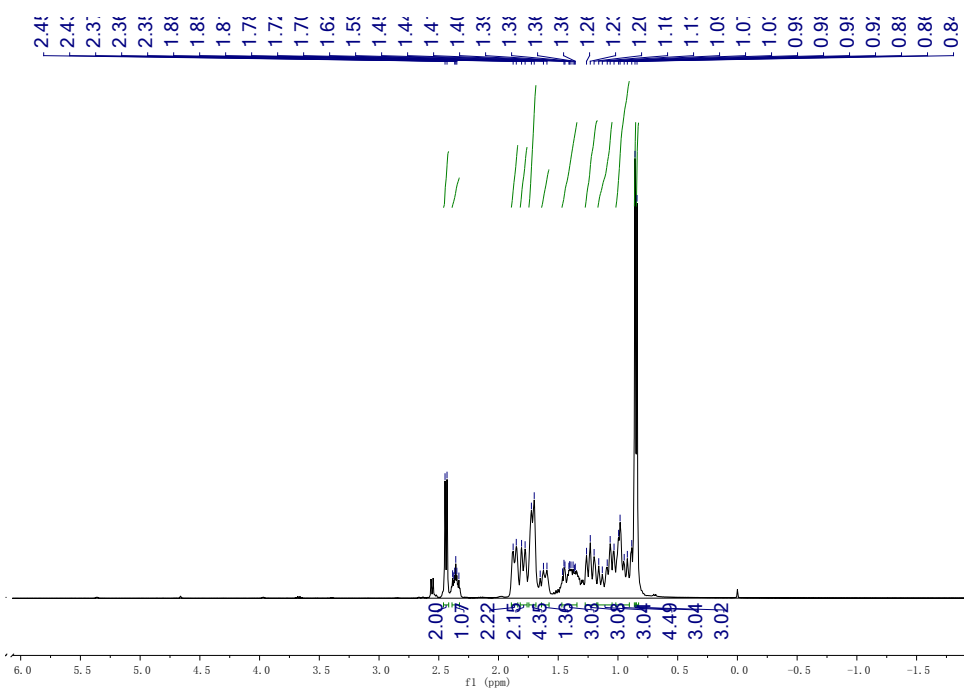

**Figure S23**  $^1\text{H}$  NMR spectrum of compound **3u**

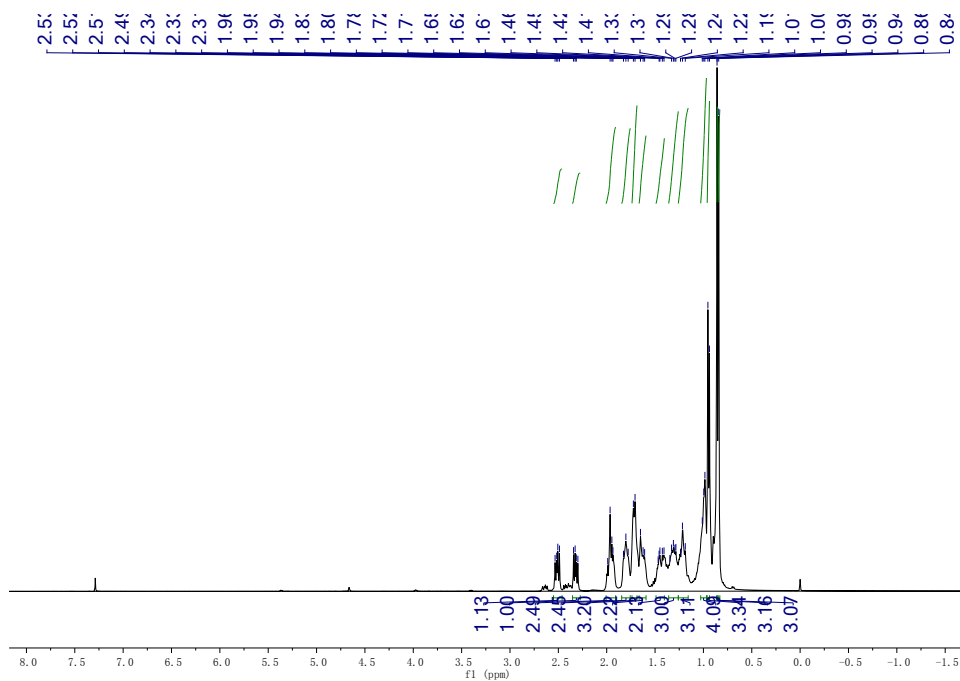

Figure S24  $^1\text{H}$  NMR spectrum of compound 3v

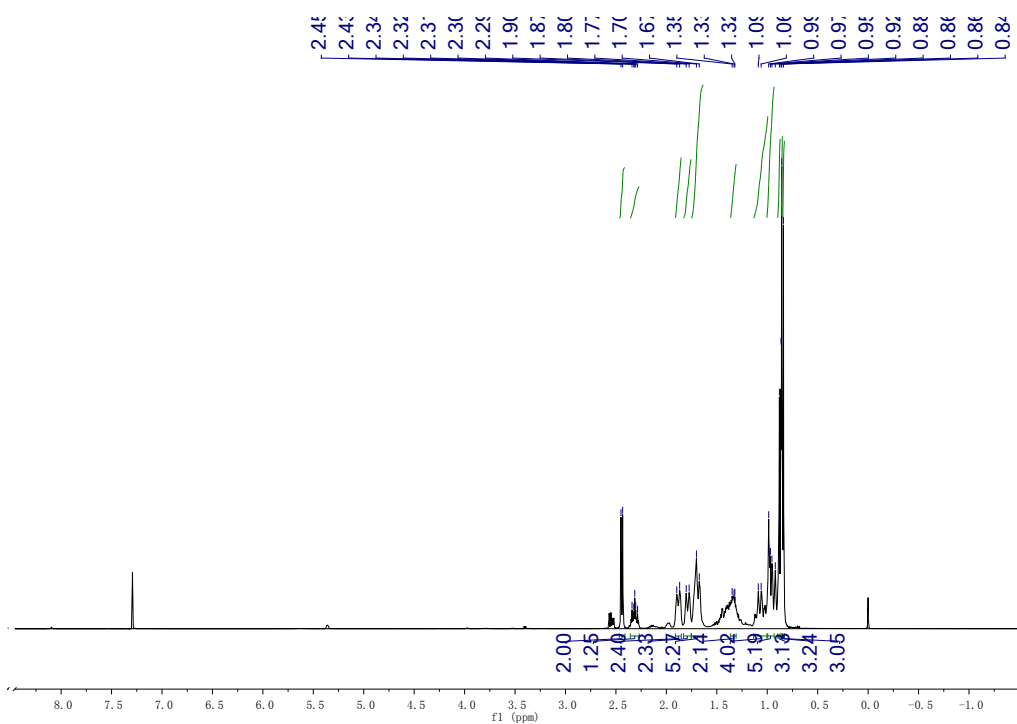

Figure S25  $^1\text{H}$  NMR spectrum of compound 3w

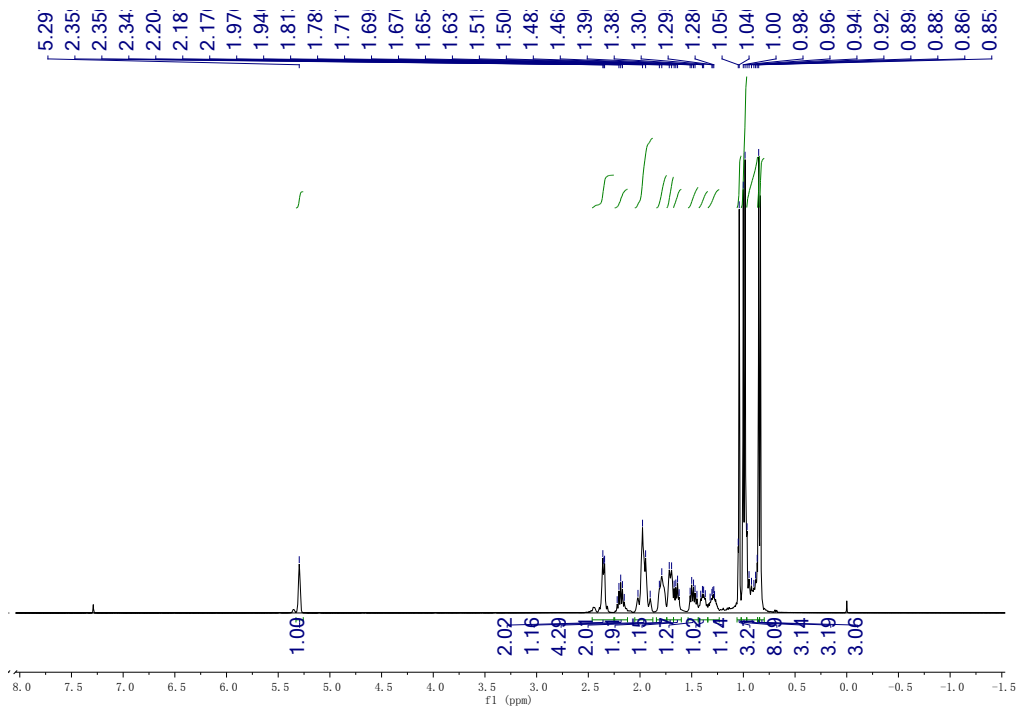

Figure S26 <sup>1</sup>H NMR spectrum of compound 3x

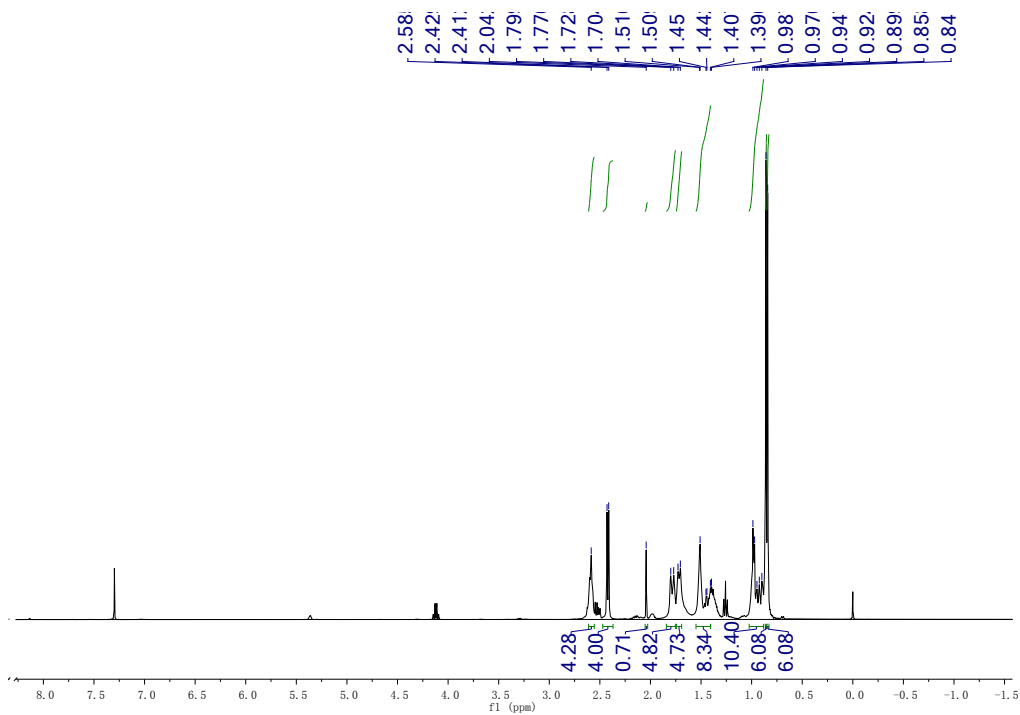

Figure S27 <sup>1</sup>H NMR spectrum of compound 3y

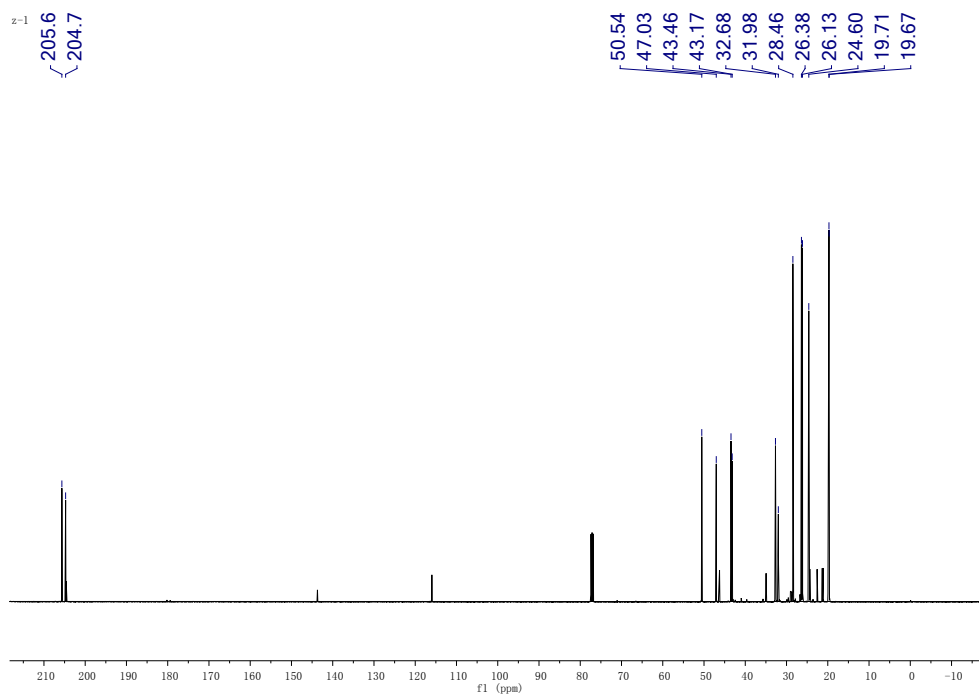

**Figure S28**  $^{13}\text{C}$  NMR spectrum of compound **2**

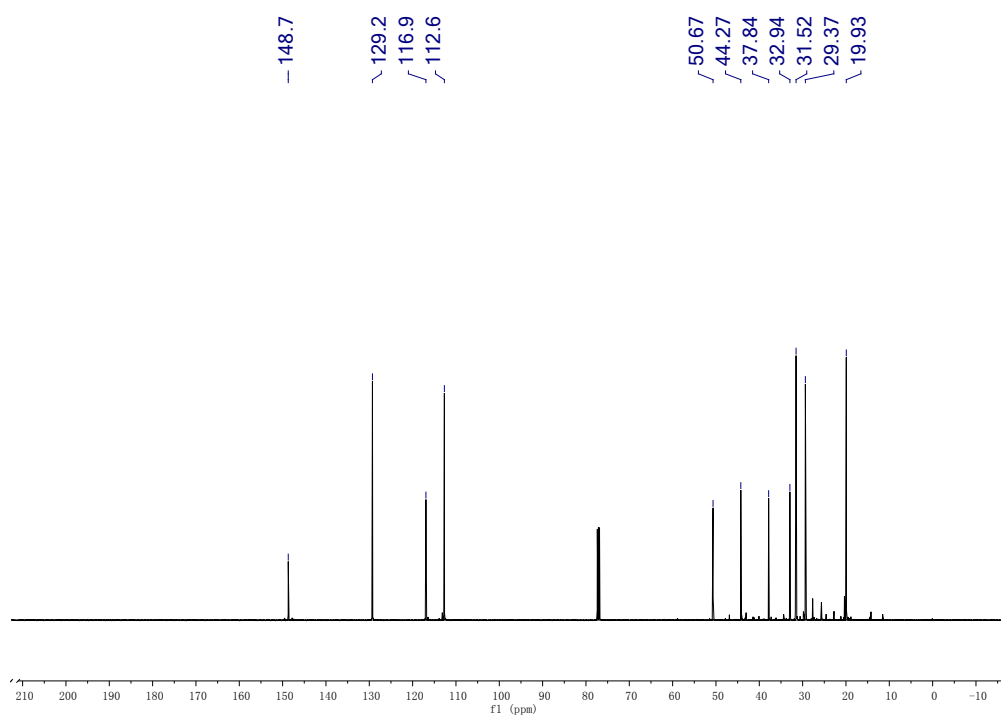

**Figure S29**  $^{13}\text{C}$  NMR spectrum of compound **3a**

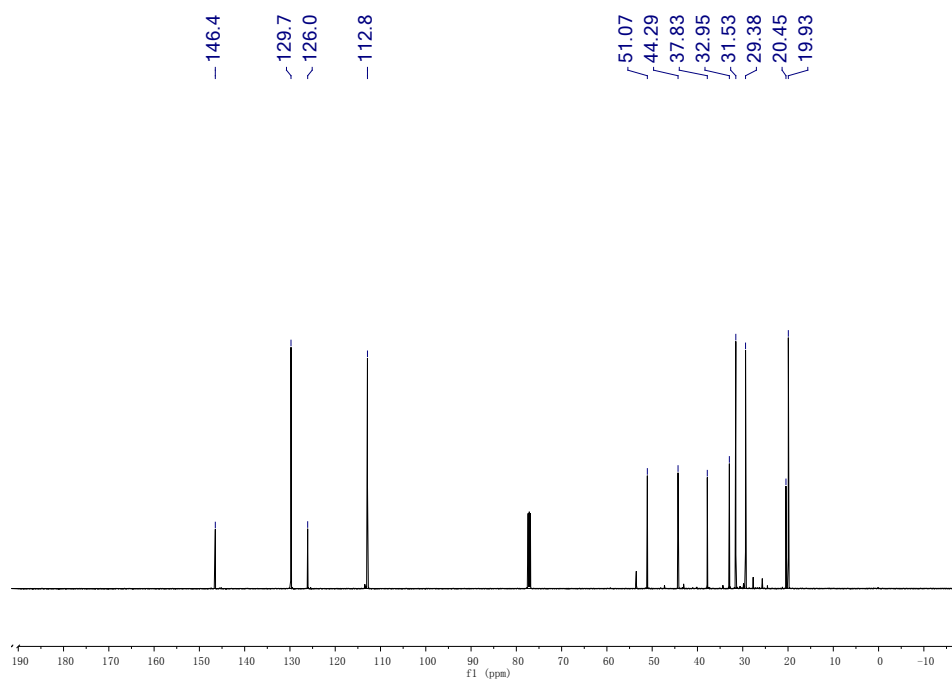

**Figure S30**  $^{13}\text{C}$  NMR spectrum of compound **3b**

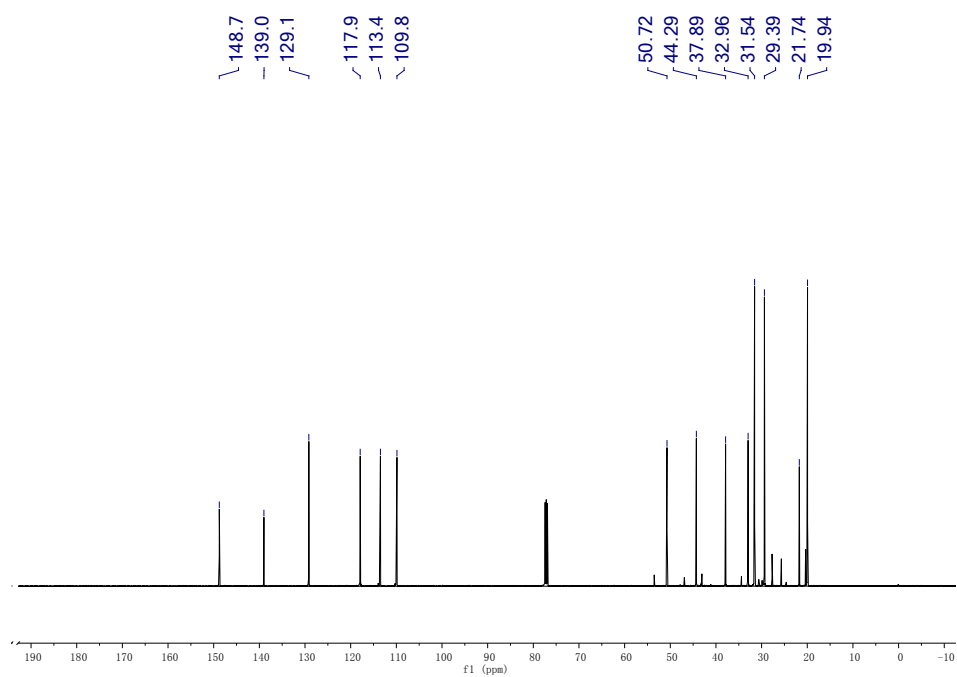

**Figure S31**  $^{13}\text{C}$  NMR spectrum of compound **3c**



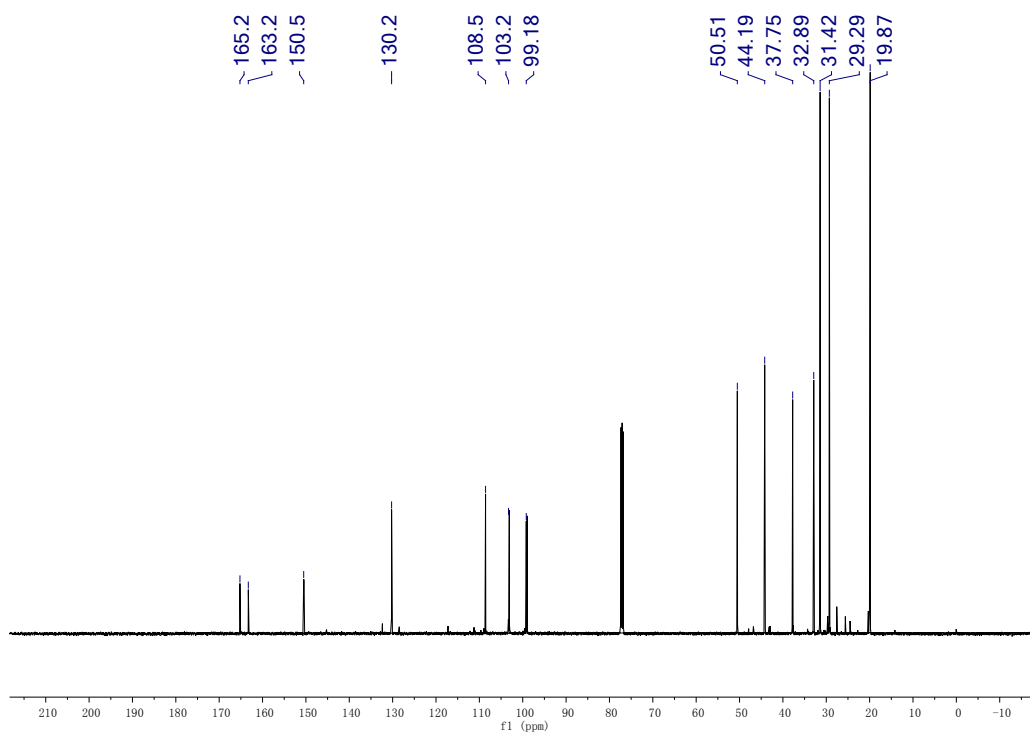

**Figure S32**  $^{13}\text{C}$  NMR spectrum of compound **3d**

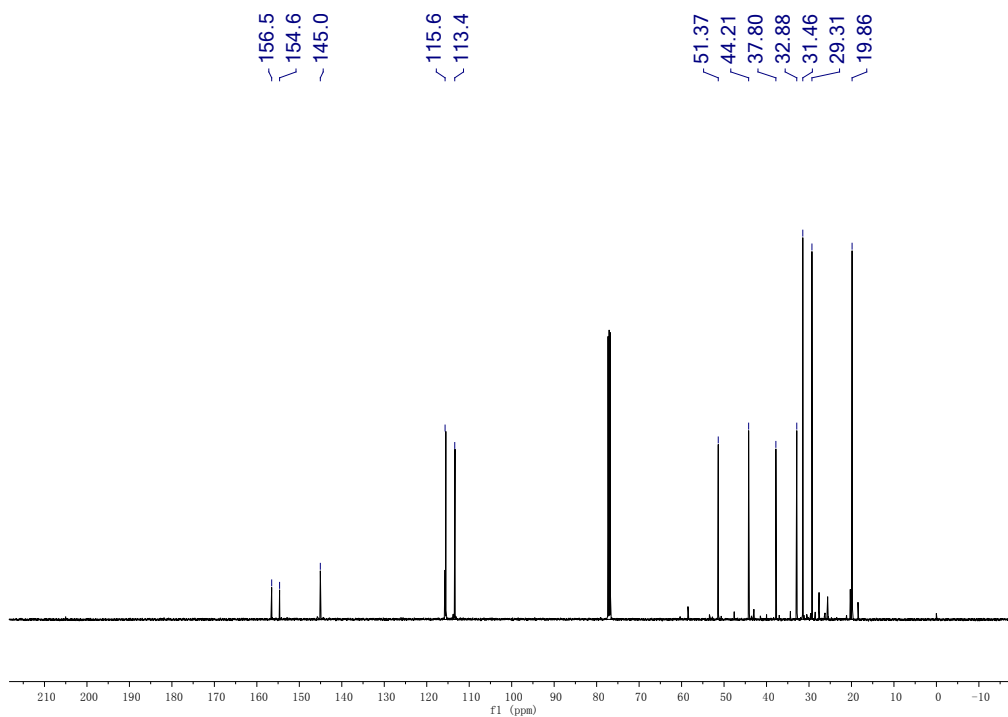

**Figure S33**  $^{13}\text{C}$  NMR spectrum of compound **3e**

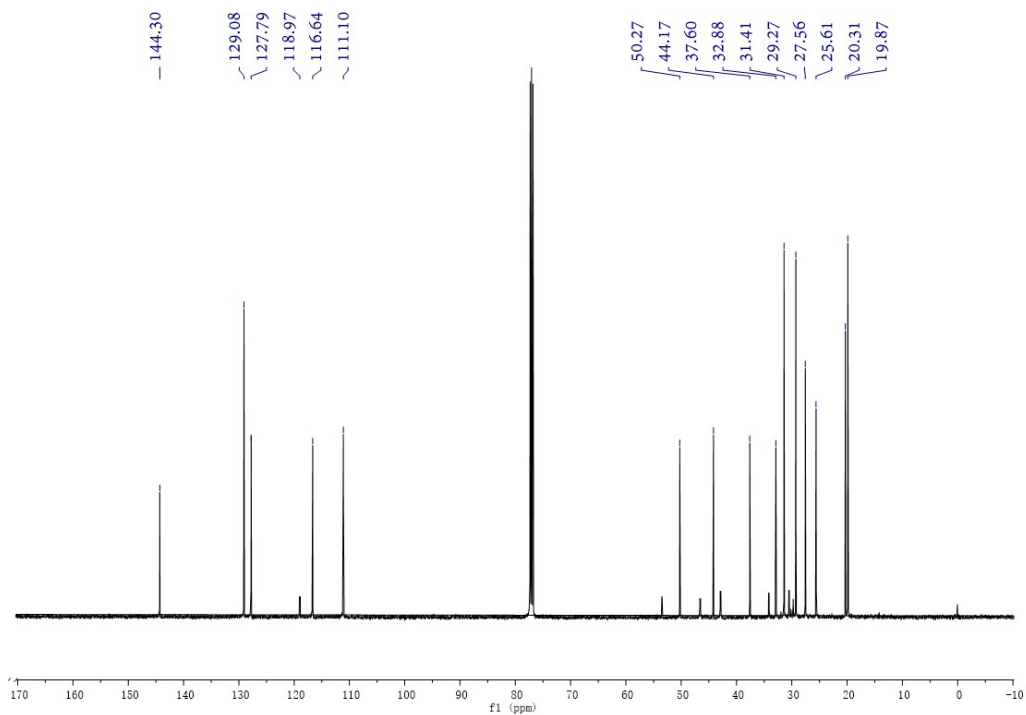

**Figure S34**  $^{13}\text{C}$  NMR spectrum of compound **3f**

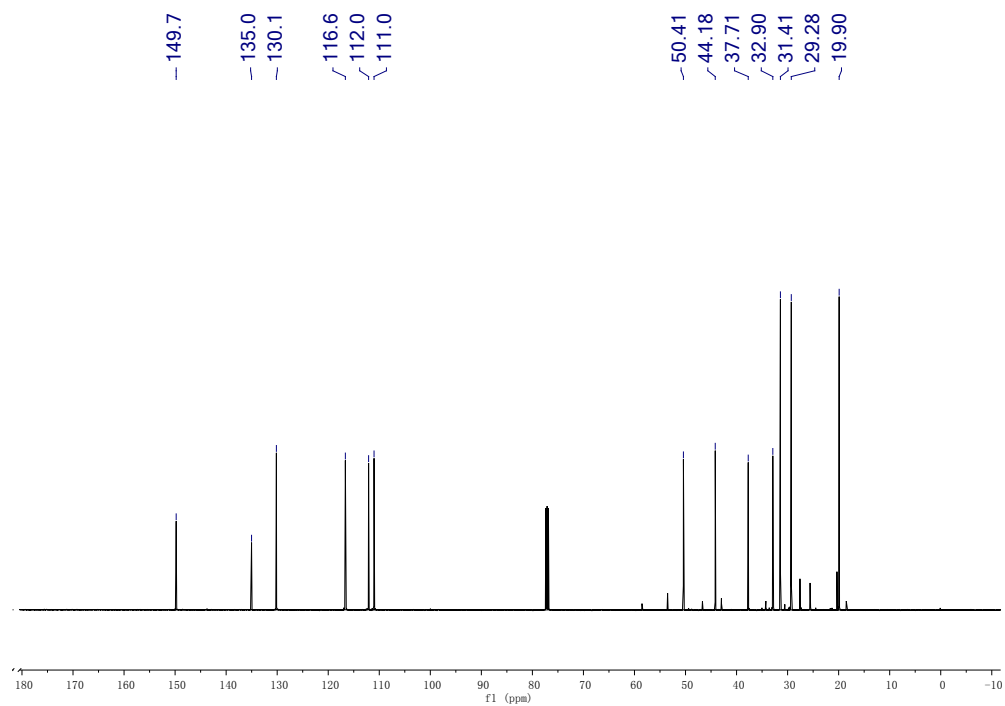

**Figure S35**  $^{13}\text{C}$  NMR spectrum of compound **3g**

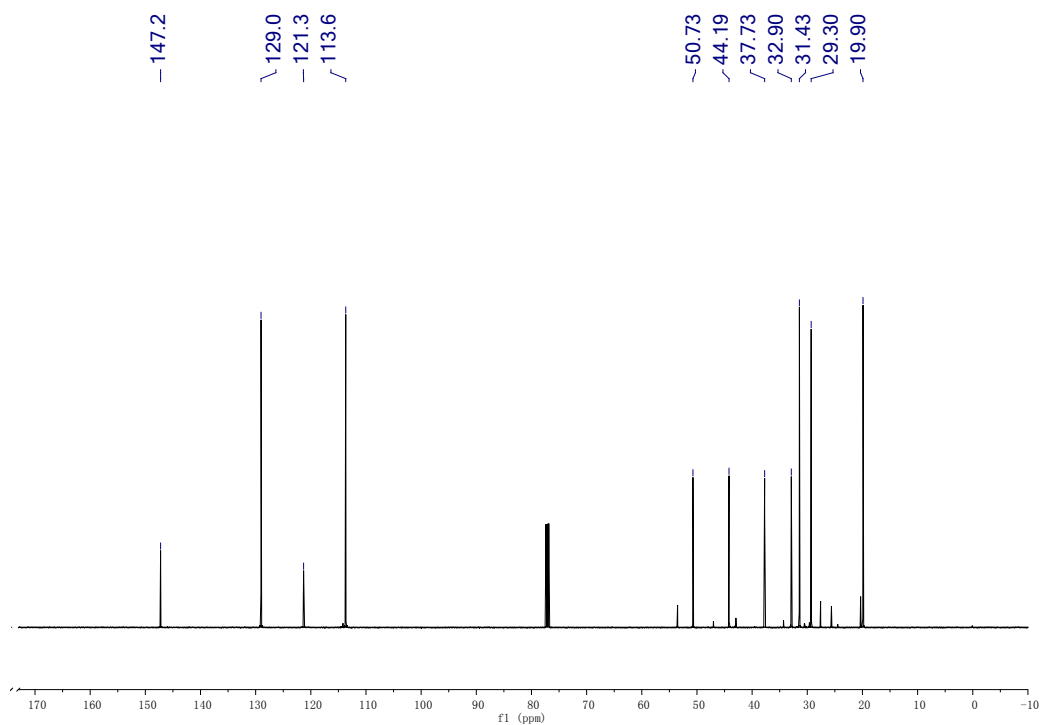

**Figure S36**  $^{13}\text{C}$  NMR spectrum of compound **3h**

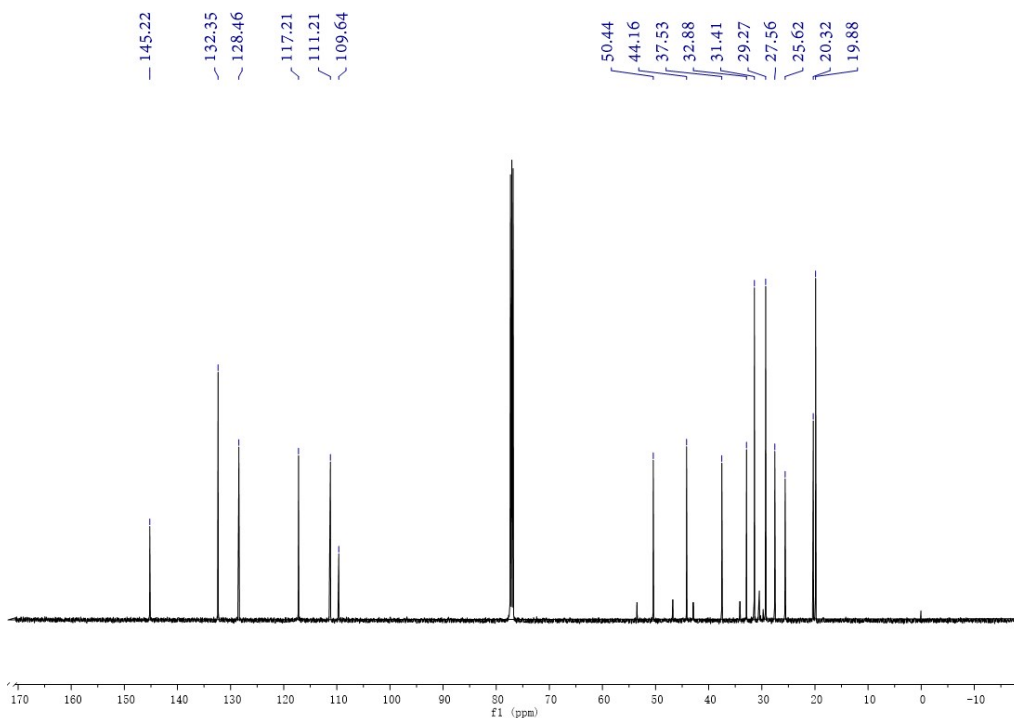

**Figure S37**  $^{13}\text{C}$  NMR spectrum of compound **3i**

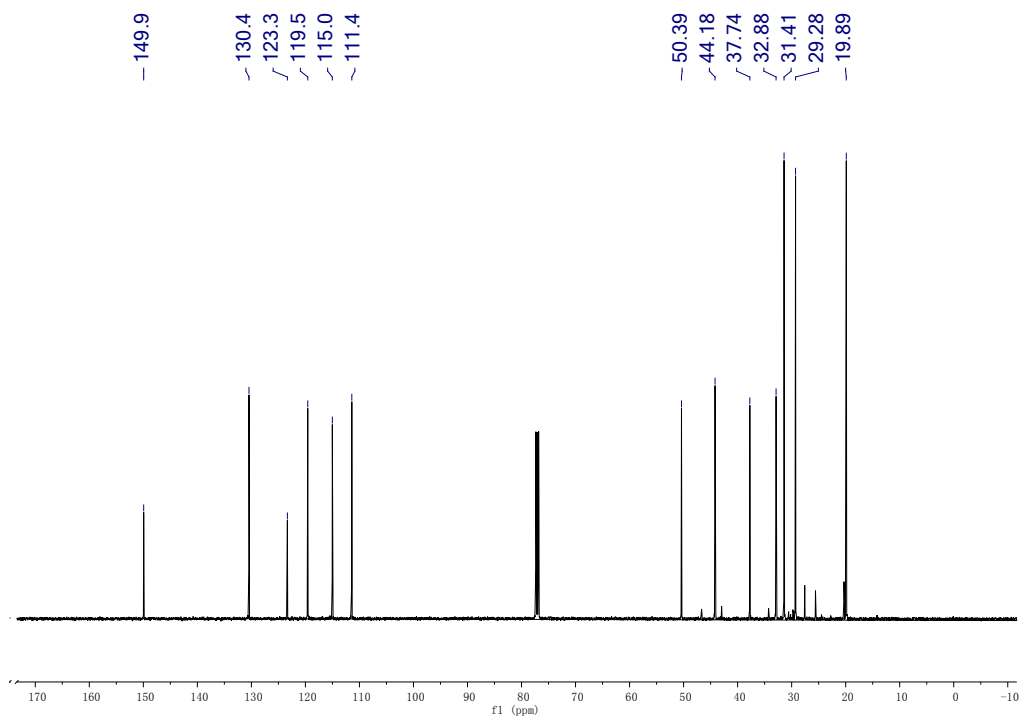

**Figure S38**  $^{13}\text{C}$  NMR spectrum of compound **3j**

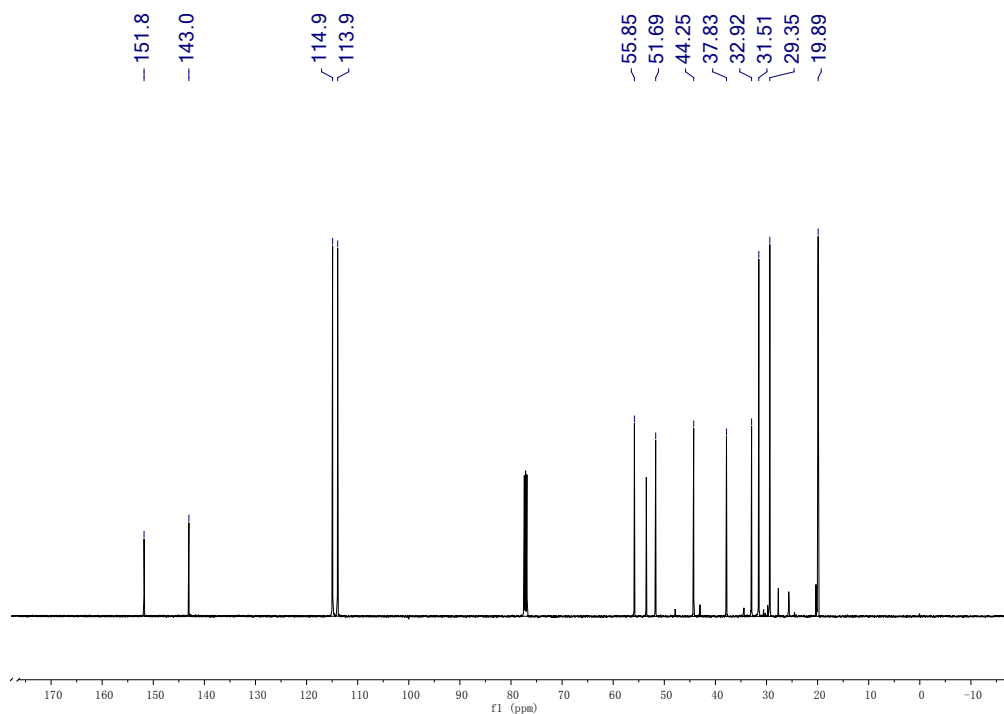

**Figure S39**  $^{13}\text{C}$  NMR spectrum of compound **3k**

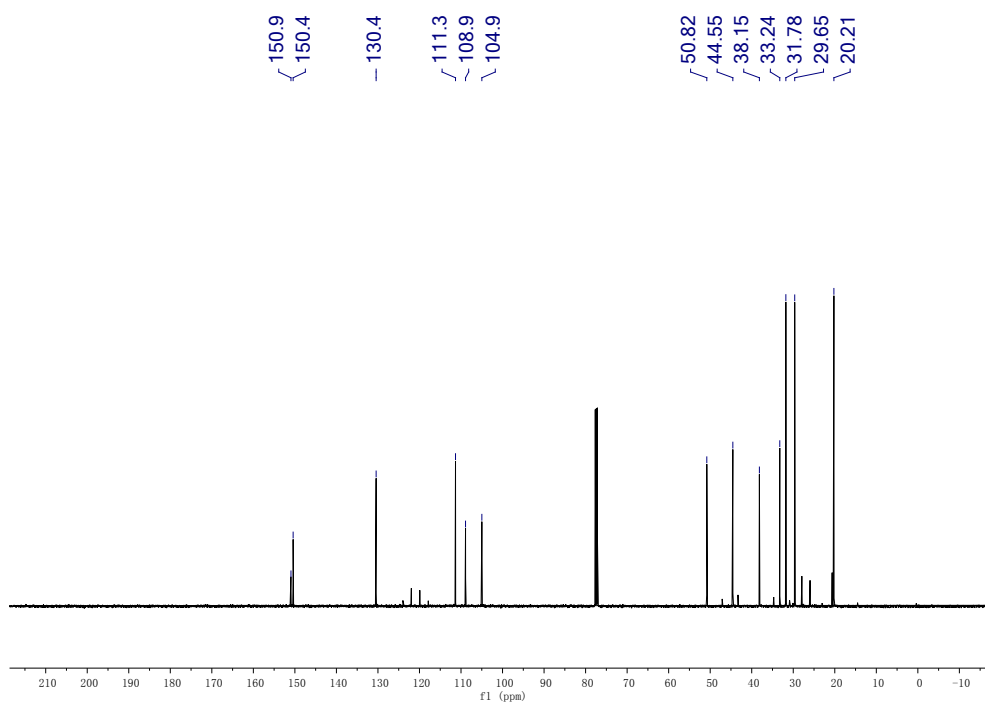

**Figure S40**  $^{13}\text{C}$  NMR spectrum of compound **3l**

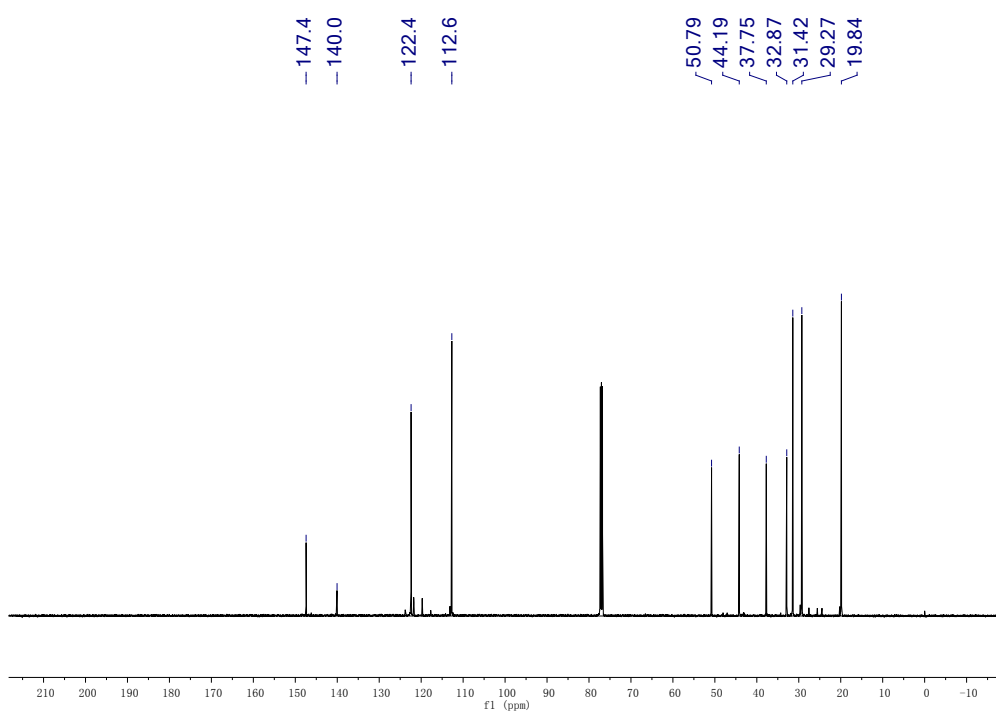

**Figure S41**  $^{13}\text{C}$  NMR spectrum of compound **3m**

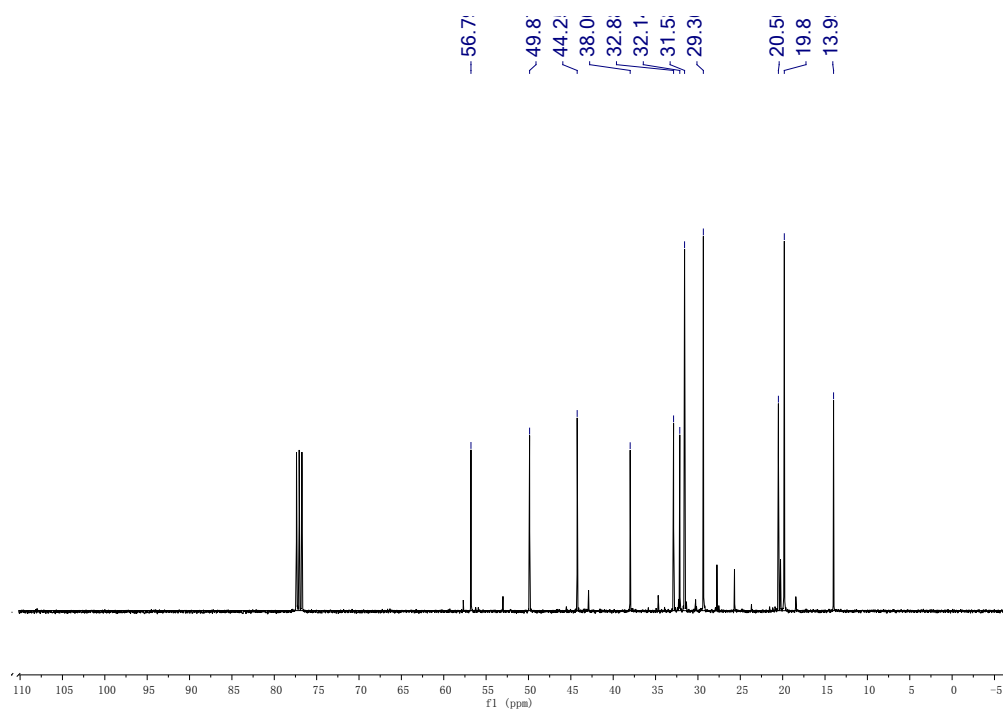

**Figure S42**  $^{13}\text{C}$  NMR spectrum of compound **3n**

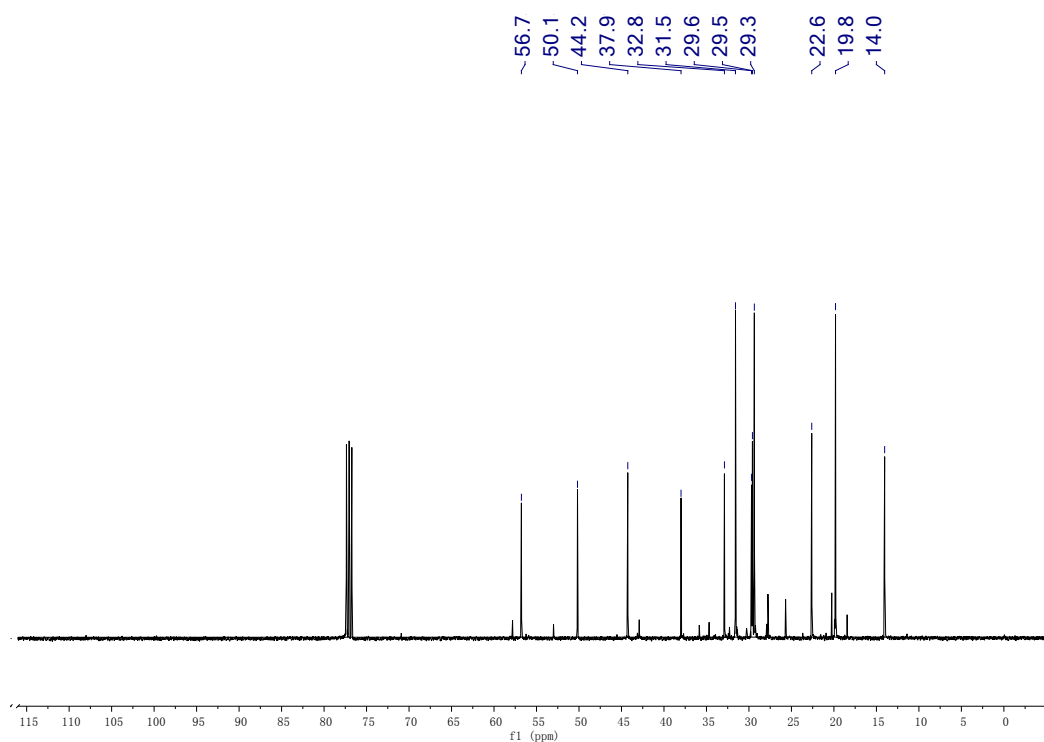

**Figure S43**  $^{13}\text{C}$  NMR spectrum of compound **3o**

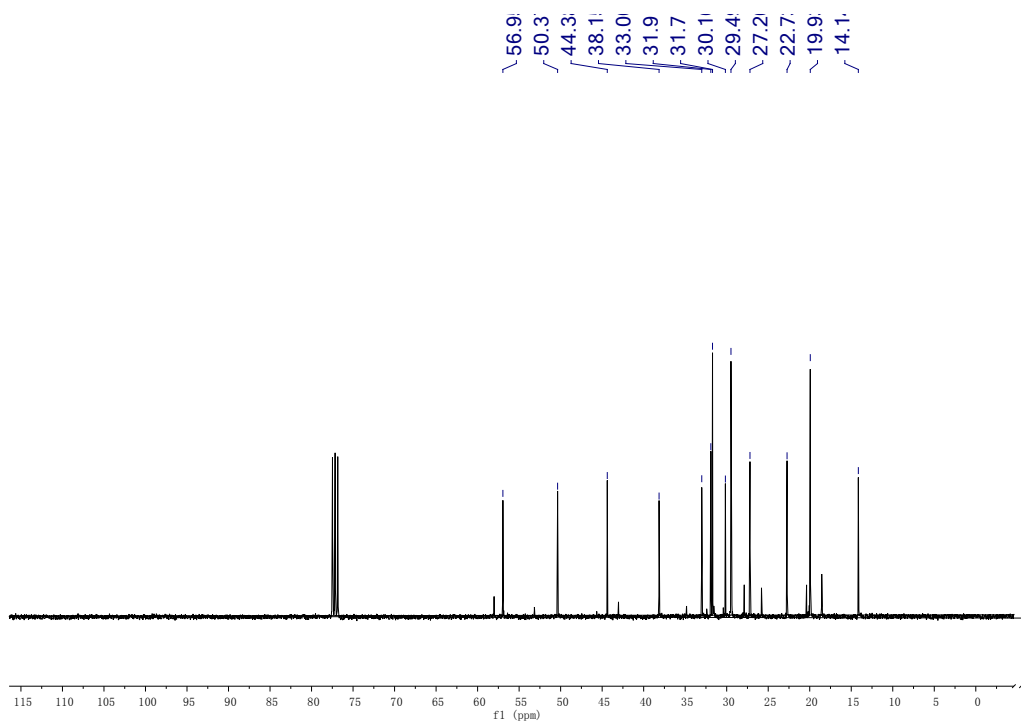

**Figure S44**  $^{13}\text{C}$  NMR spectrum of compound **3p**

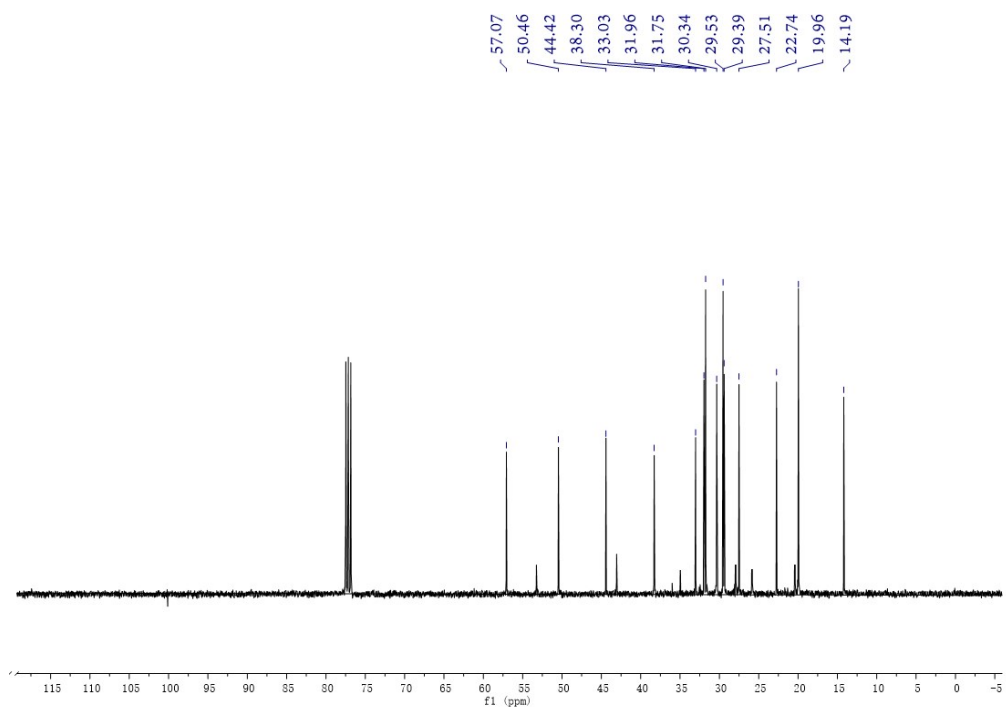

**Figure S45**  $^{13}\text{C}$  NMR spectrum of compound **3q**

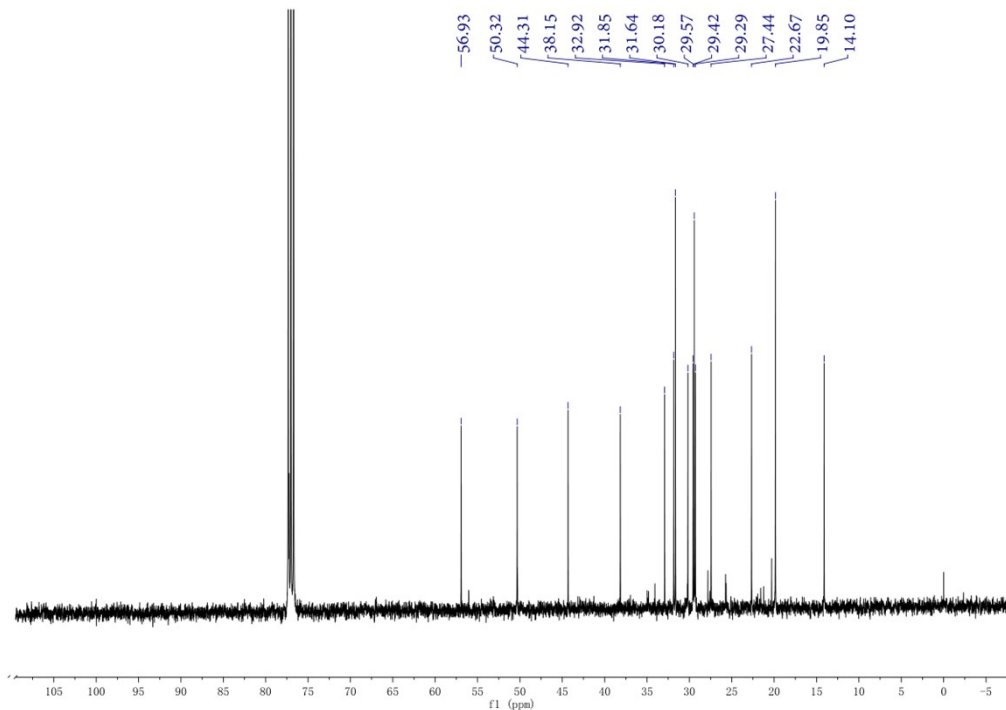

Figure S46  $^{13}\text{C}$  NMR spectrum of compound **3r**

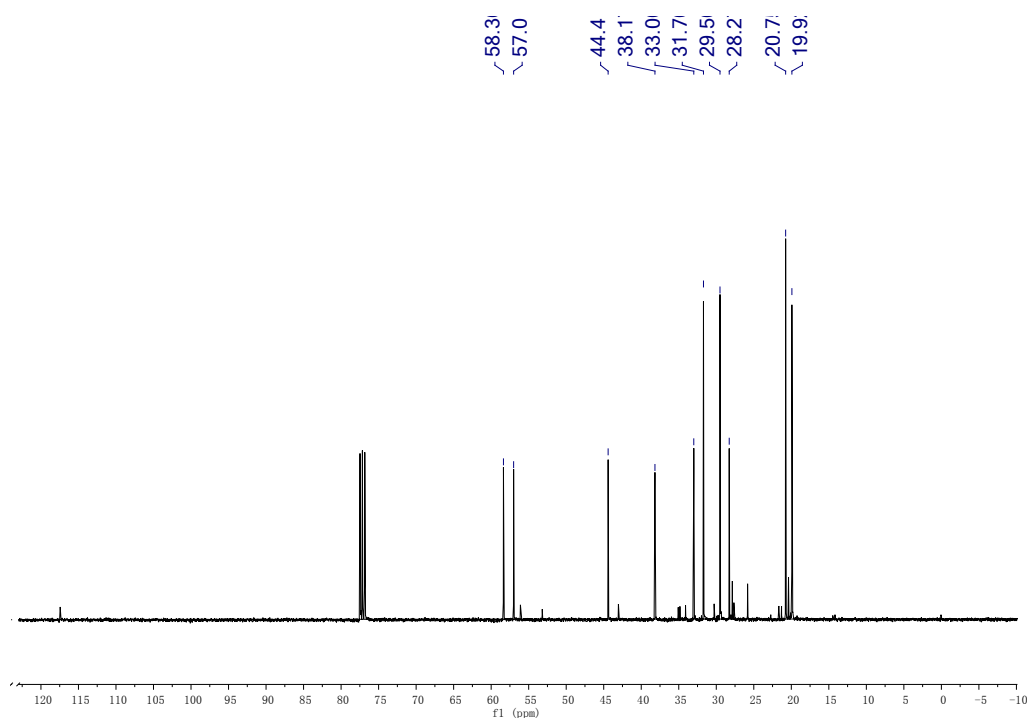

Figure S47  $^{13}\text{C}$  NMR spectrum of compound **3s**



z-2

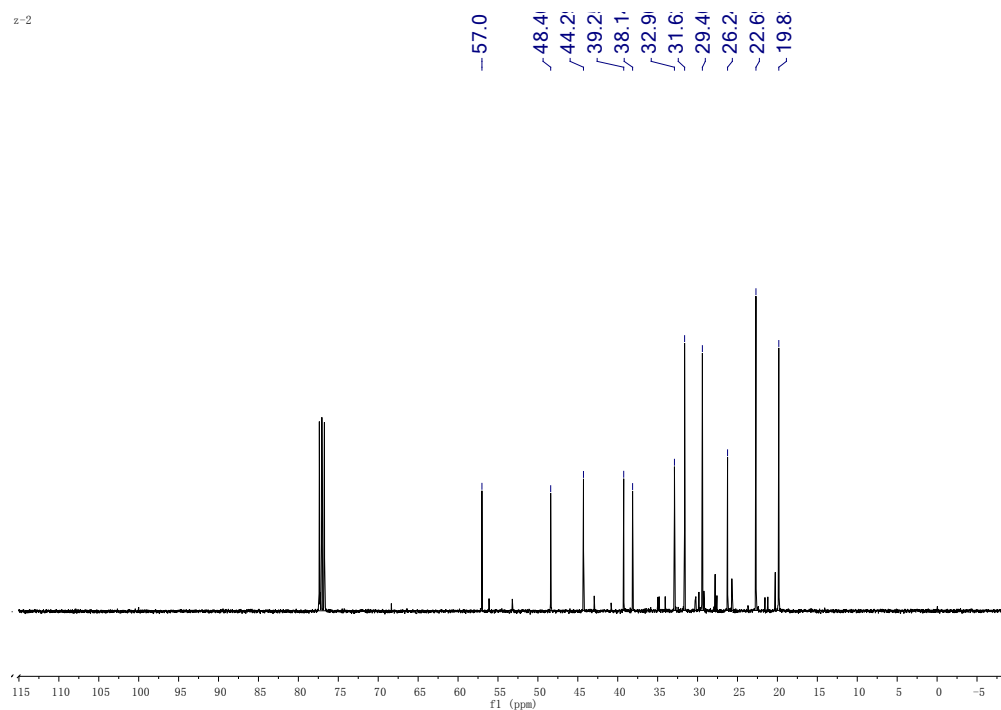

**Figure S48**  $^{13}\text{C}$  NMR spectrum of compound **3t**

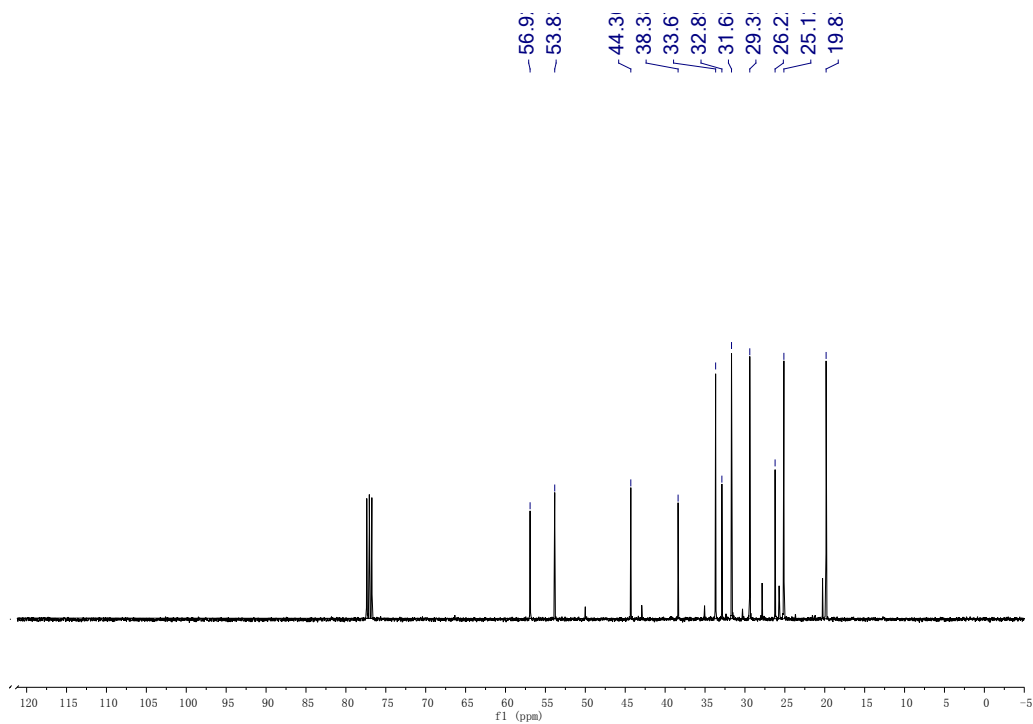

**Figure S49**  $^{13}\text{C}$  NMR spectrum of compound **3u**

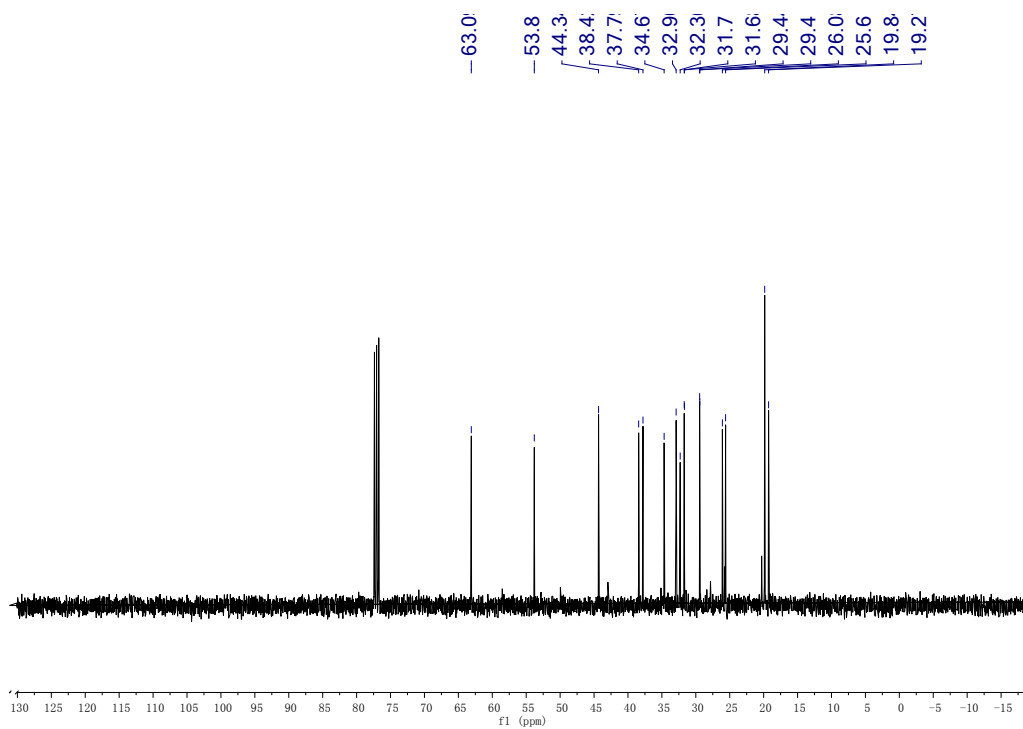

Figure S50  $^{13}\text{C}$  NMR spectrum of compound **3v**

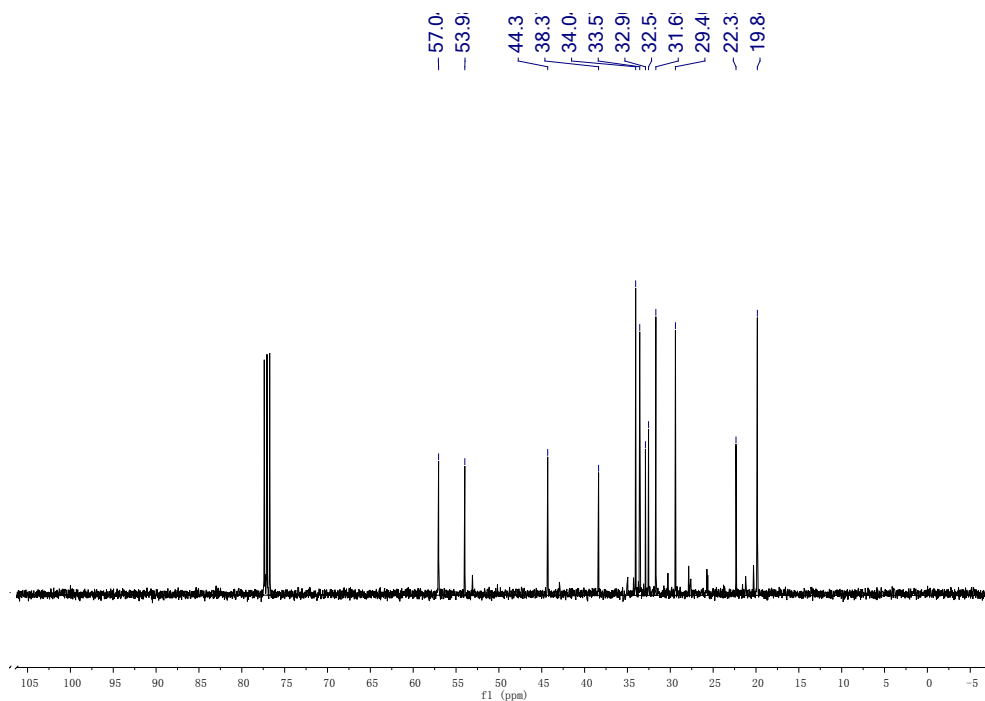

Figure S51  $^{13}\text{C}$  NMR spectrum of compound **3w**

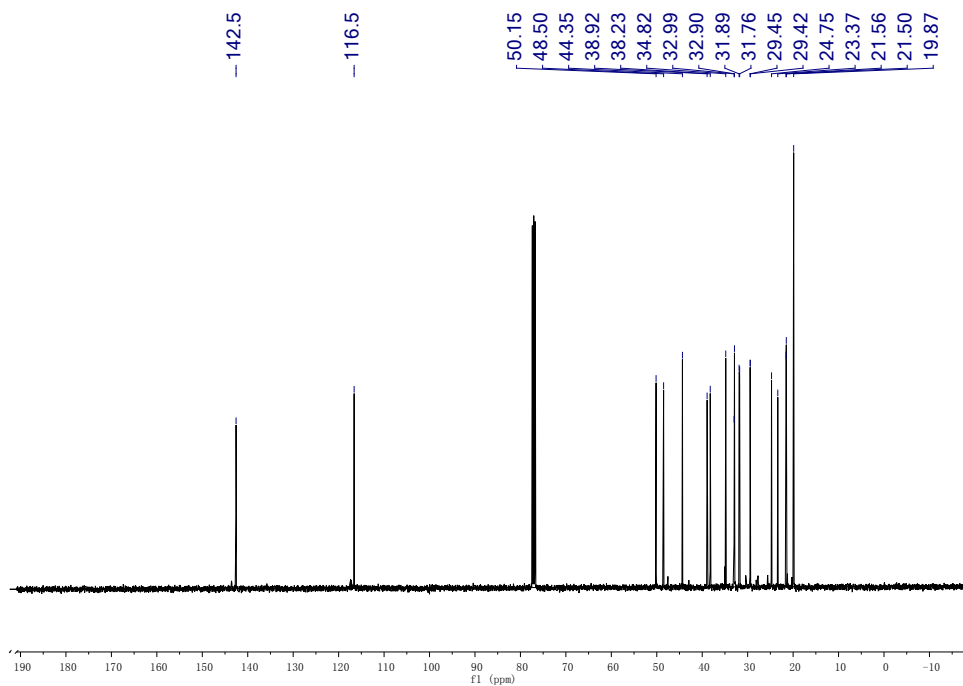

Figure S52  $^{13}\text{C}$  NMR spectrum of compound **3x**

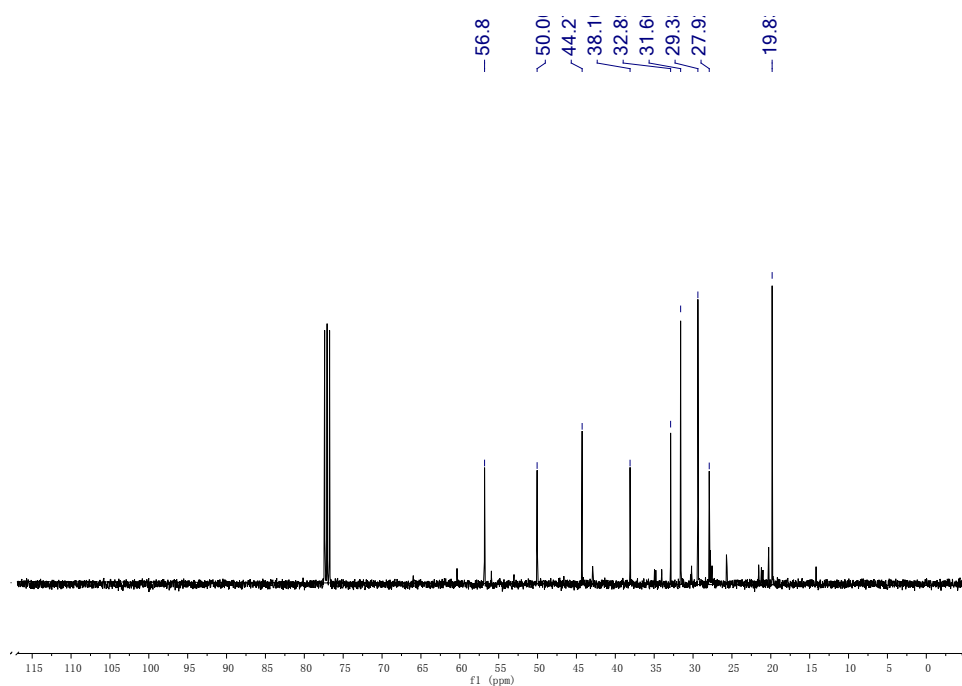

Figure S53  $^{13}\text{C}$  NMR spectrum of compound **3y**

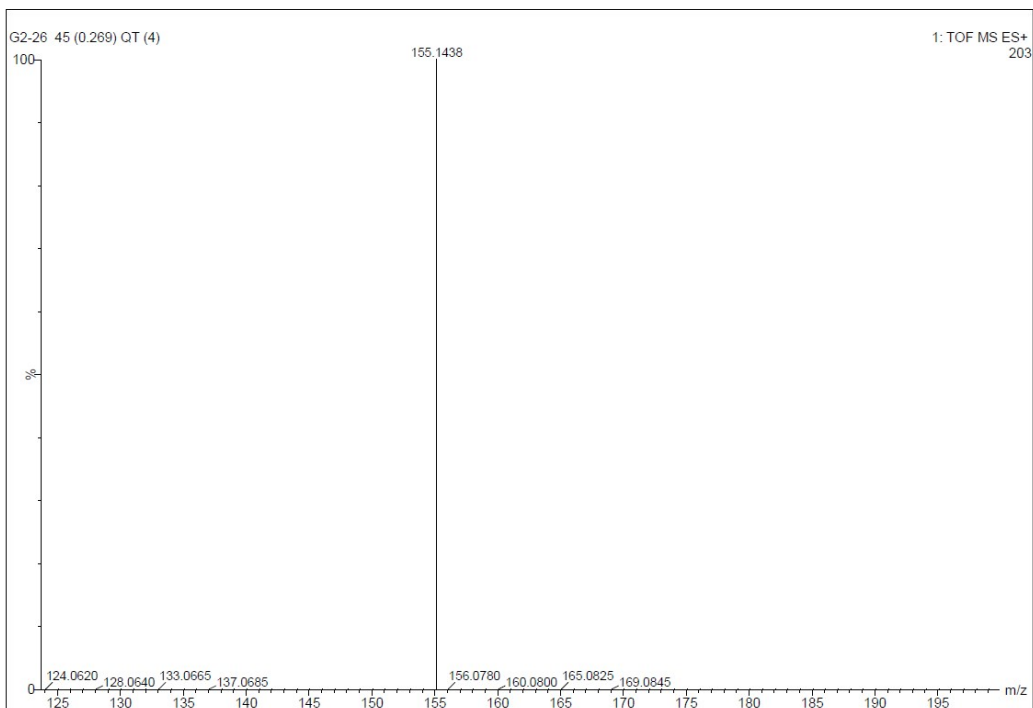

**Figure 54** HRMS spectrum of compound **2**

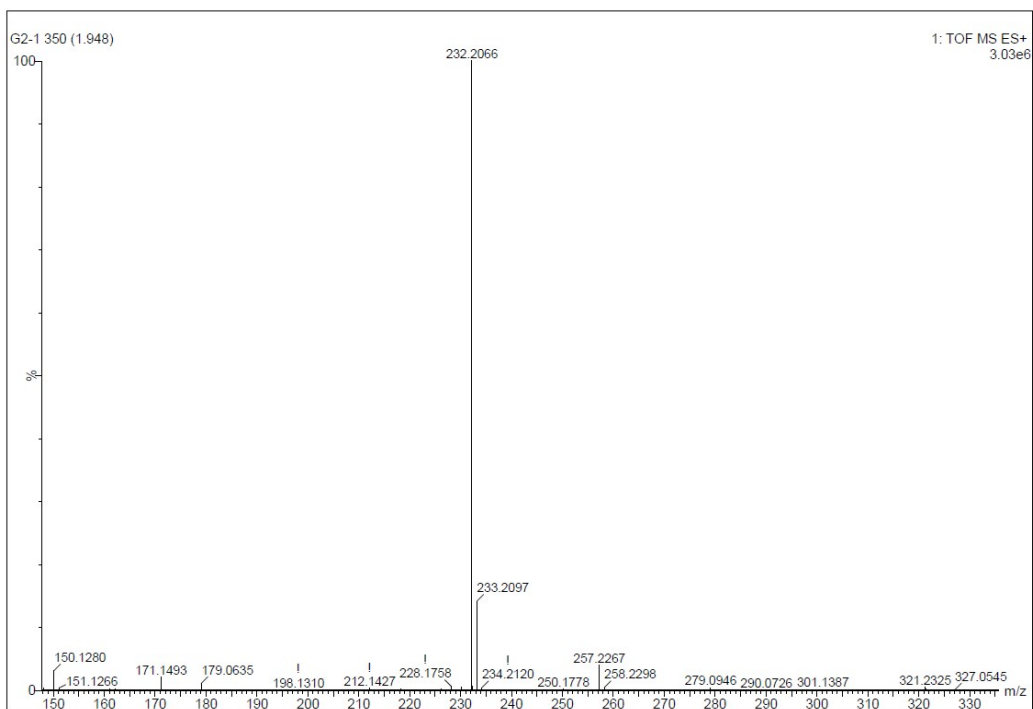

**Figure 55** HRMS spectrum of compound **3a**

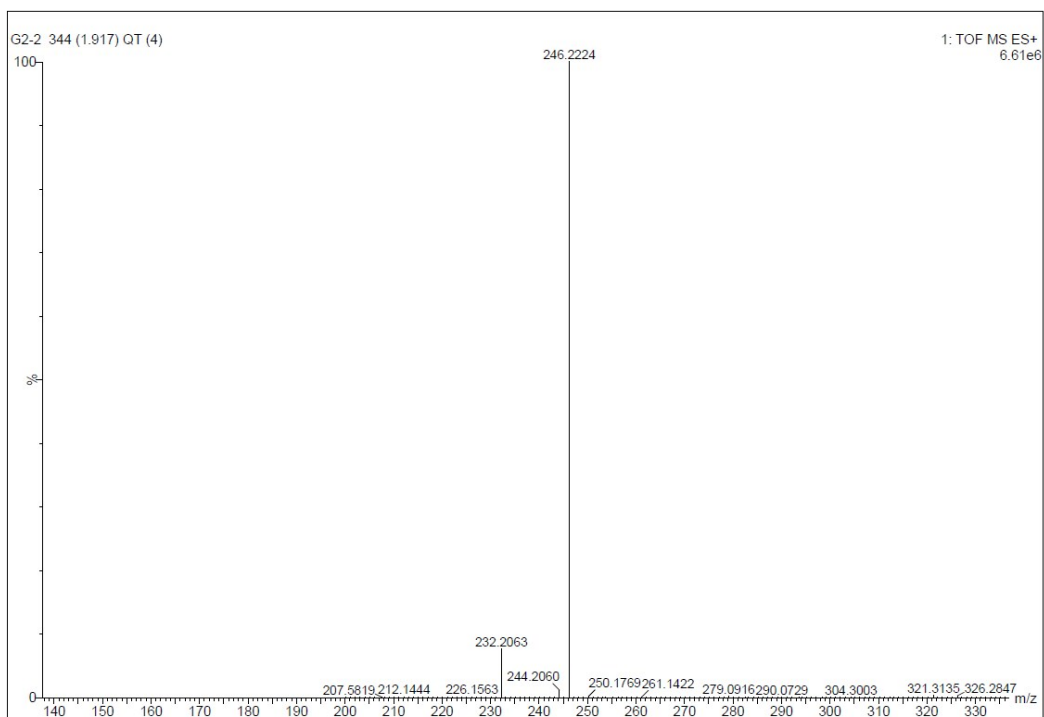

**Figure 56** HRMS spectrum of compound **3b**

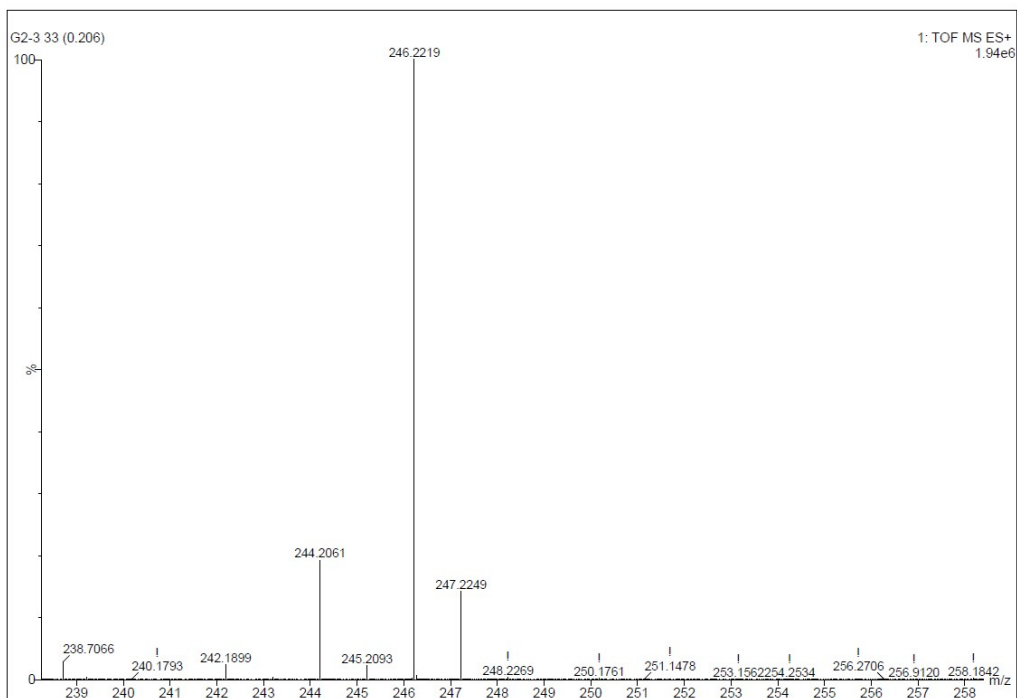

**Figure 57** HRMS spectrum of compound **3c**

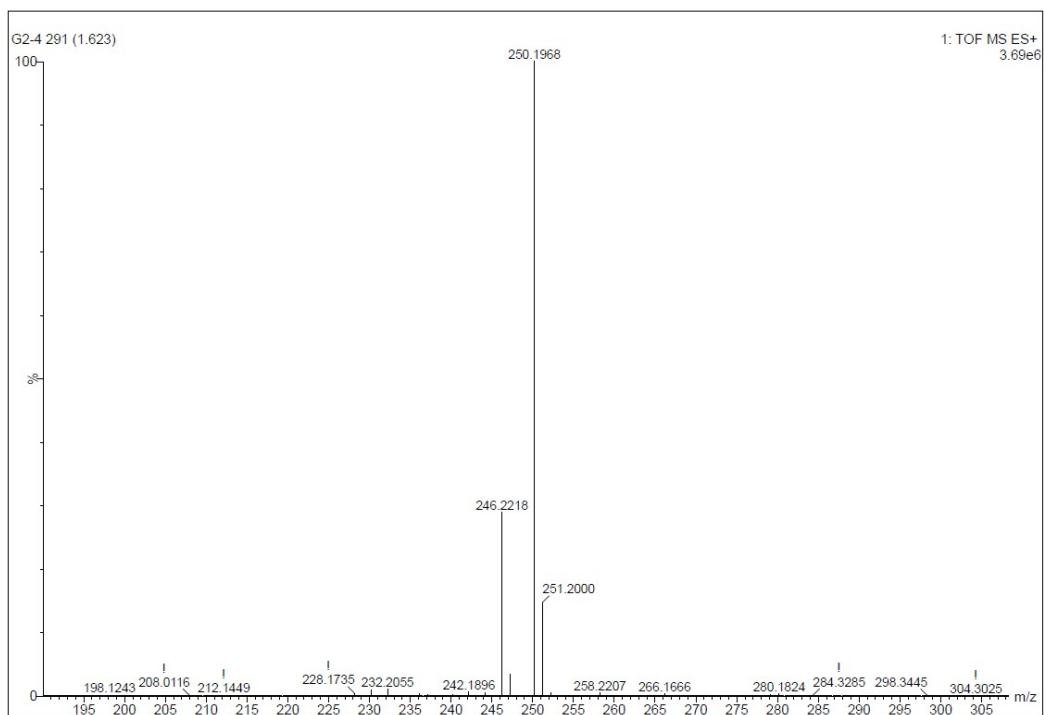

**Figure 58** HRMS spectrum of compound **3d**

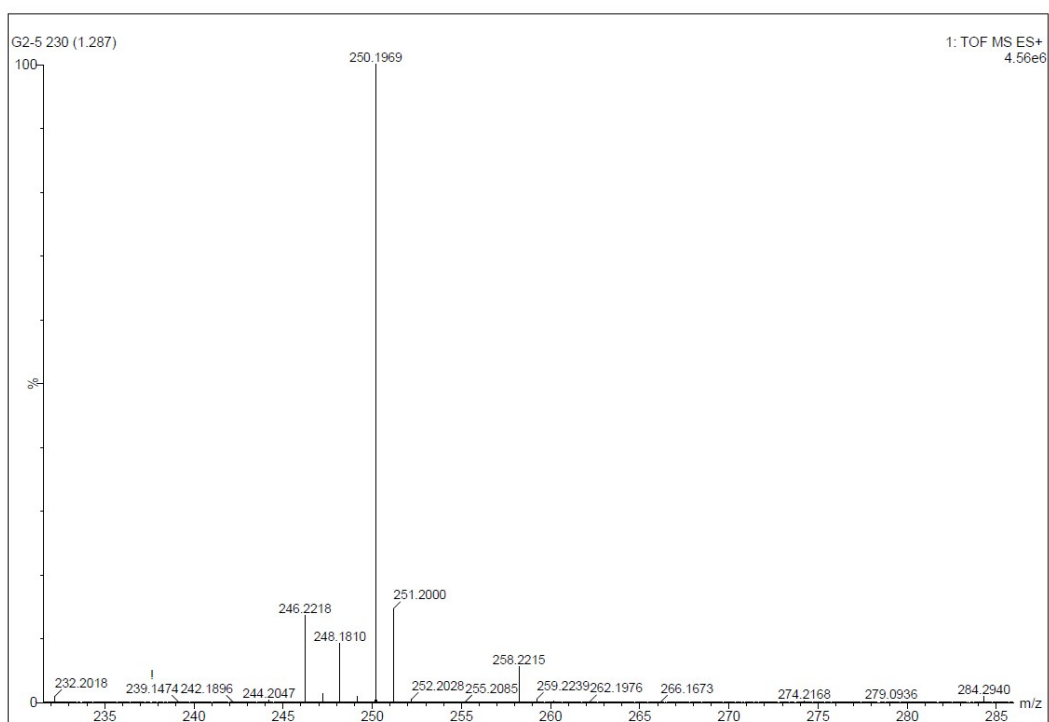

**Figure 59** HRMS spectrum of compound **3e**

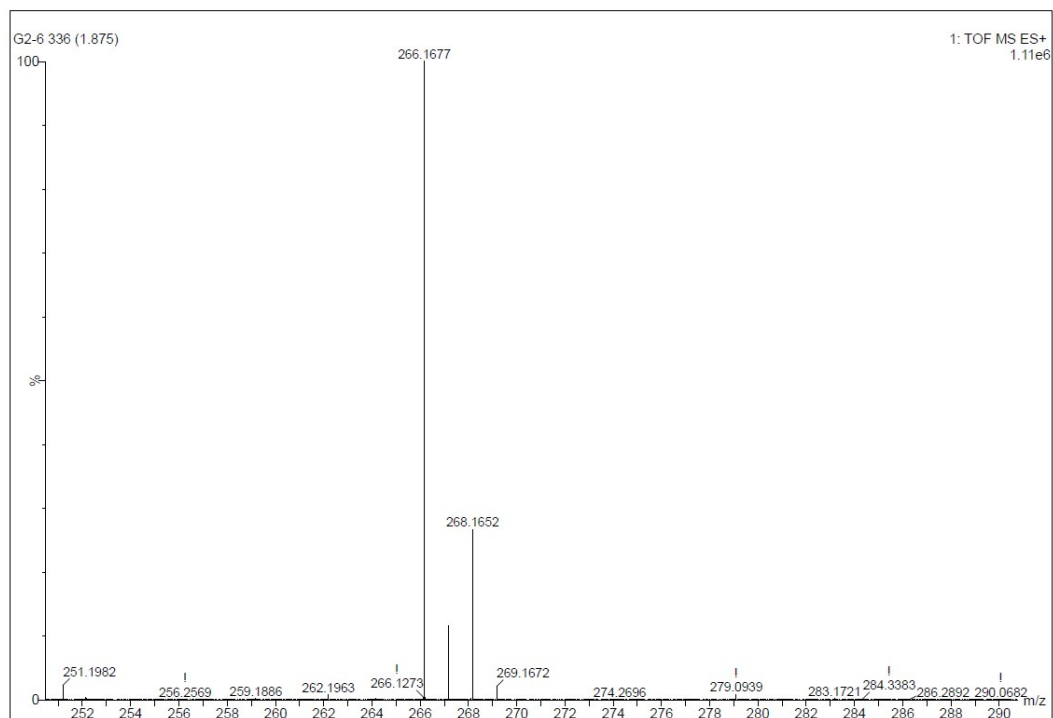

**Figure 60** HRMS spectrum of compound **3f**

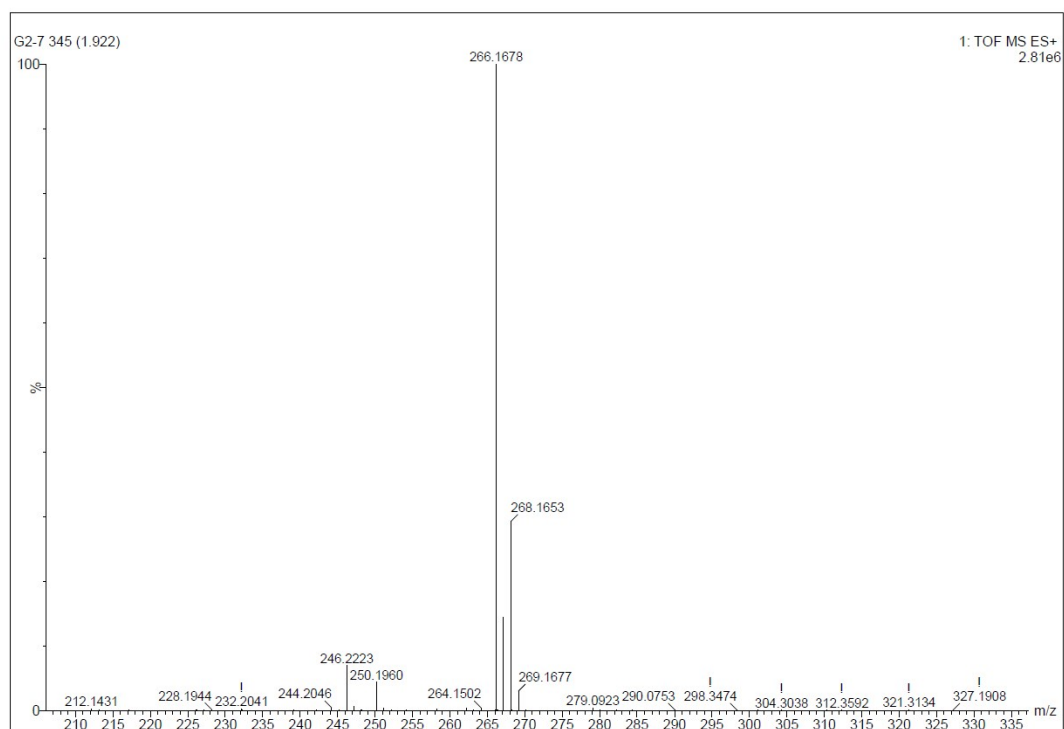

**Figure 61** HRMS spectrum of compound **3g**

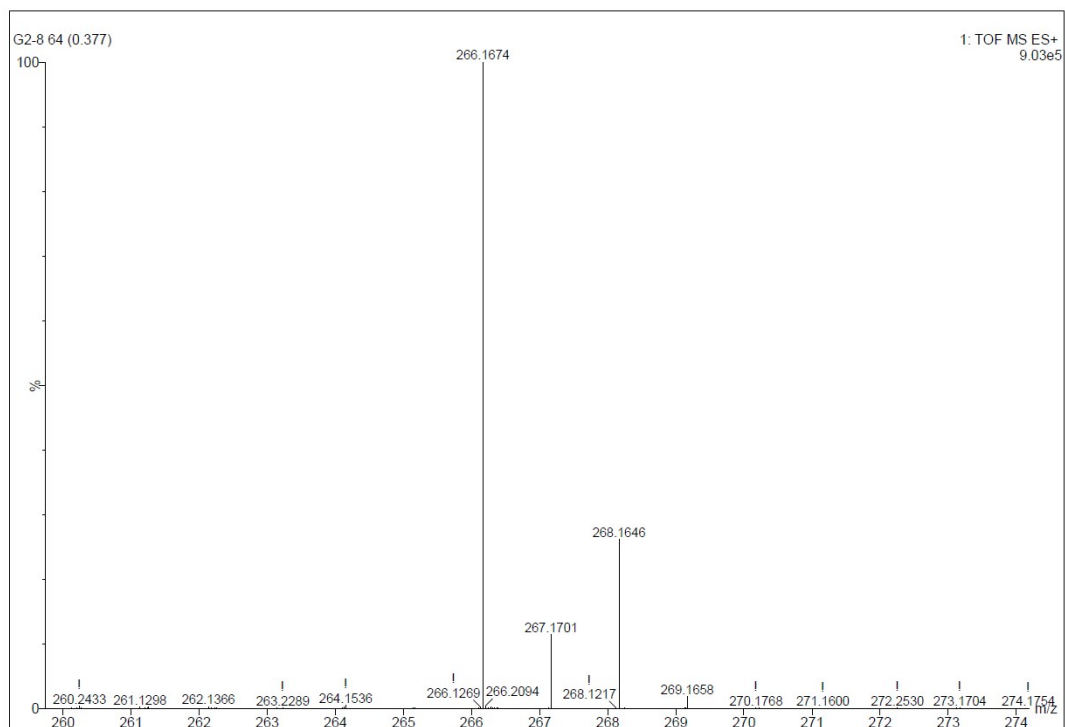

**Figure 62** HRMS spectrum of compound **3h**

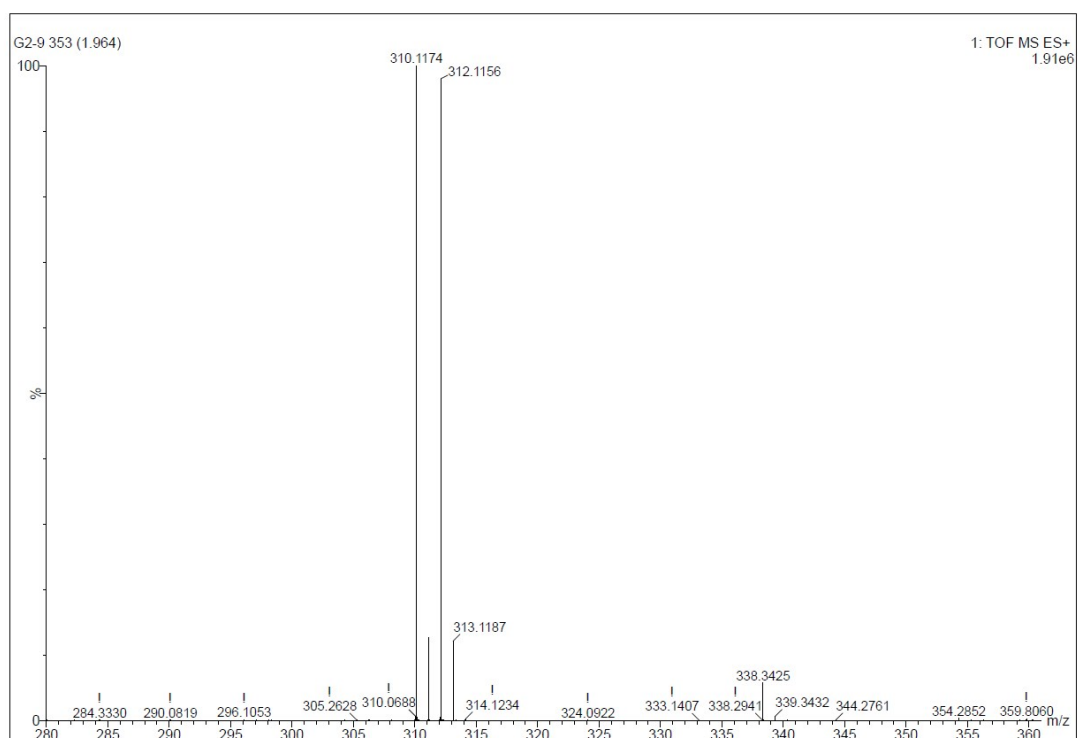

**Figure 63** HRMS spectrum of compound **3i**



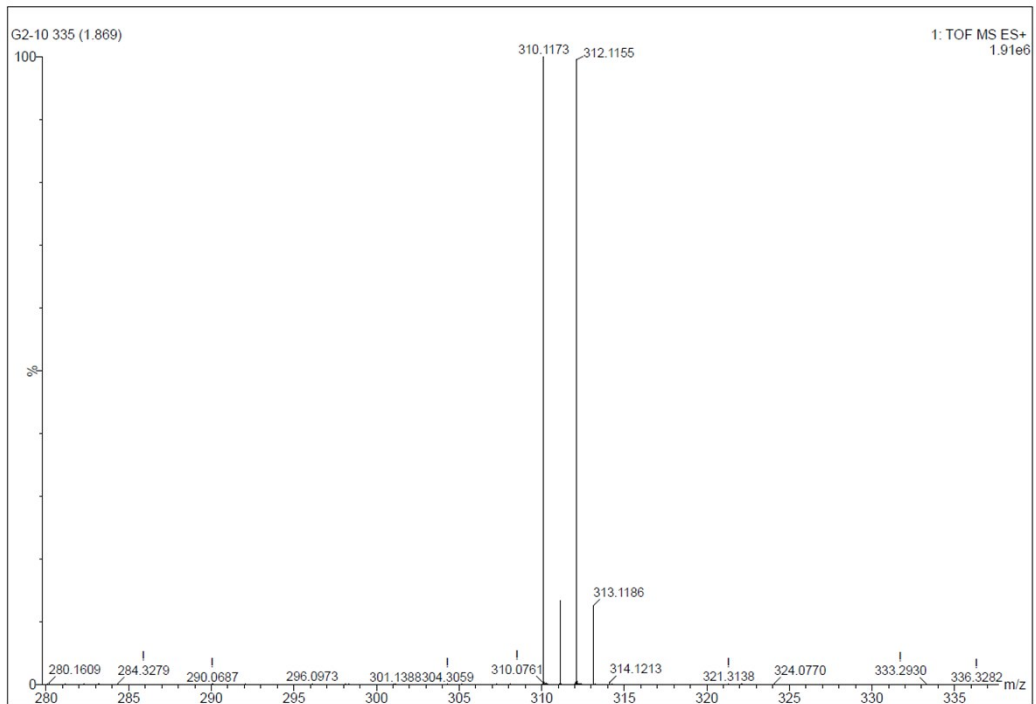

**Figure 64** HRMS spectrum of compound **3j**

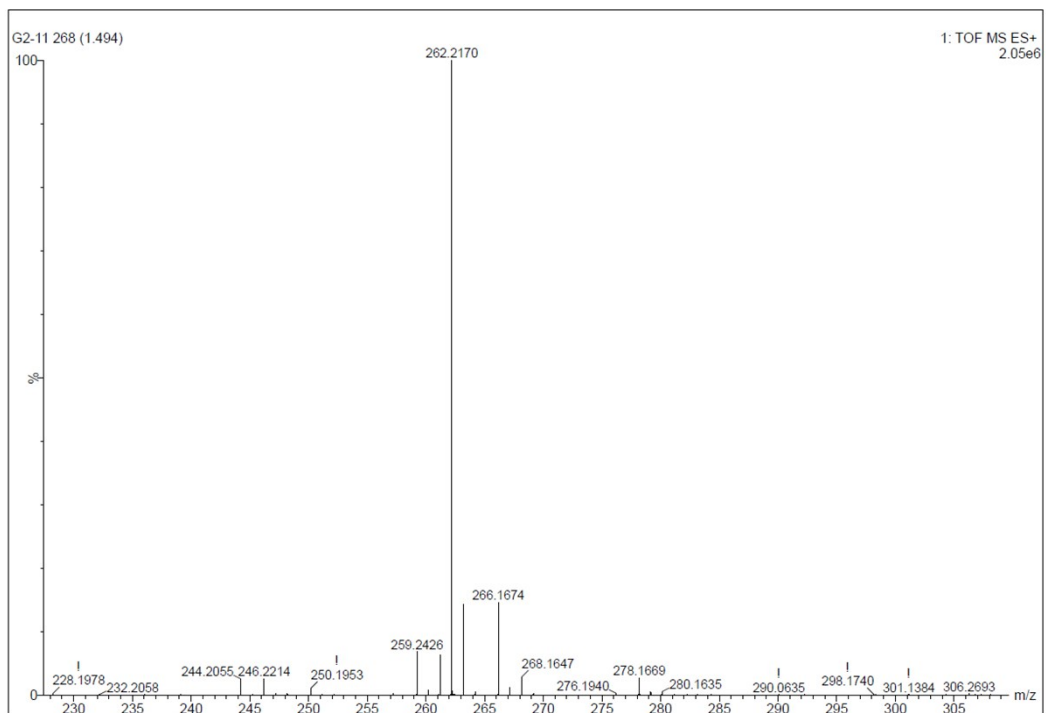

**Figure 65** HRMS spectrum of compound **3k**

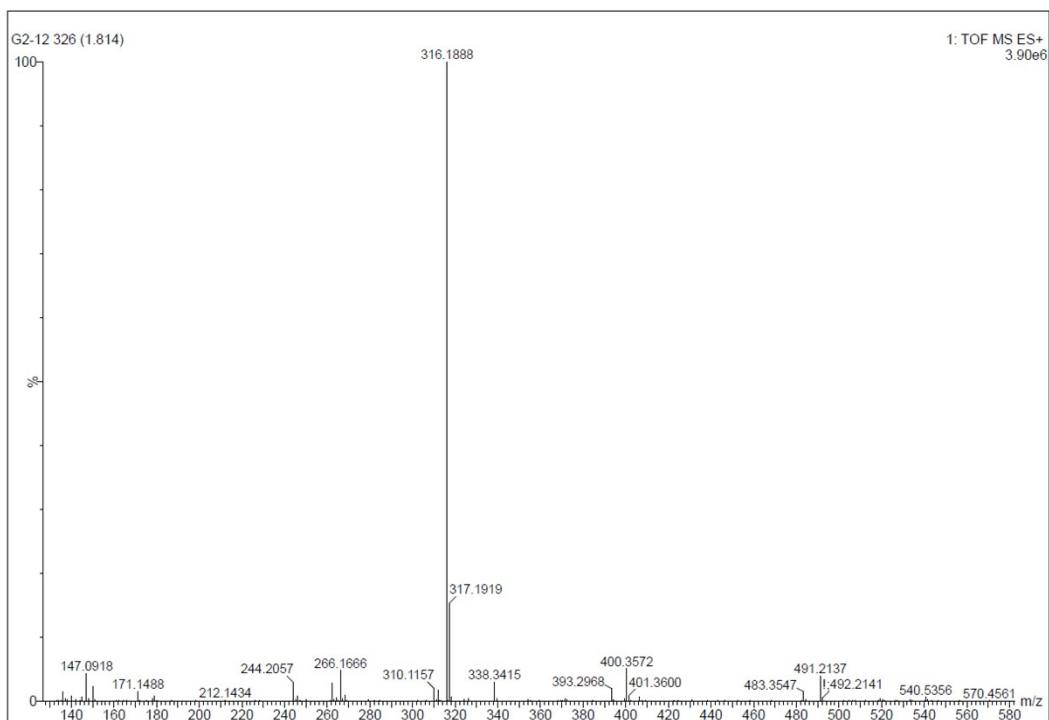

**Figure 66** HRMS spectrum of compound **3l**

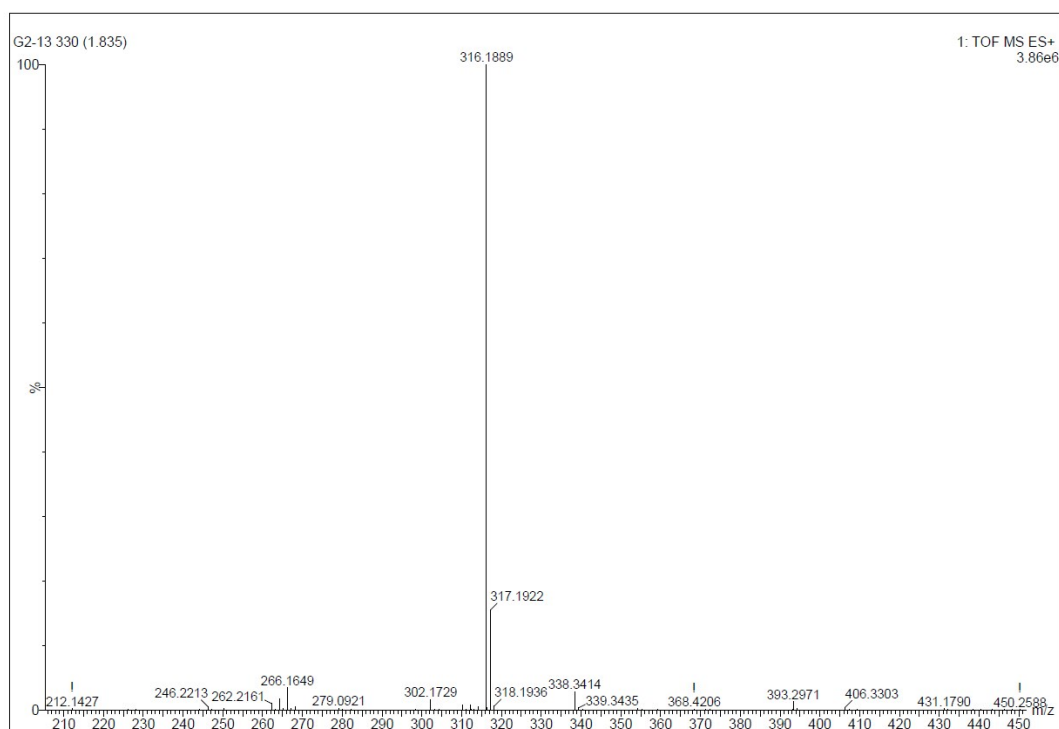

**Figure 67** HRMS spectrum of compound **3m**

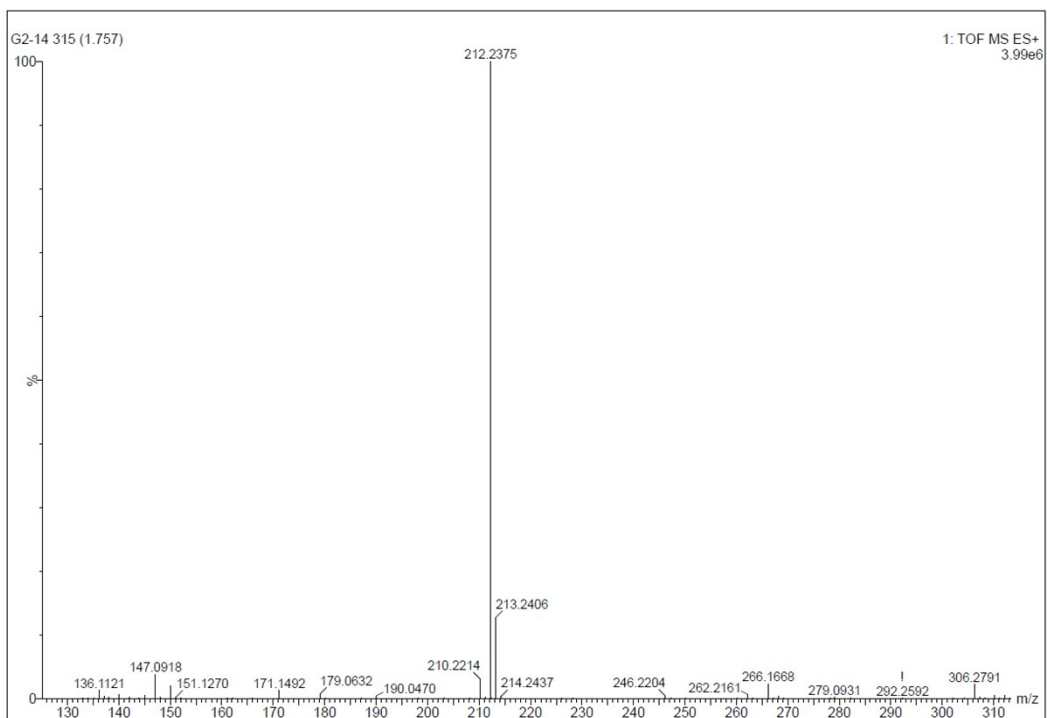

**Figure 68** HRMS spectrum of compound **3n**

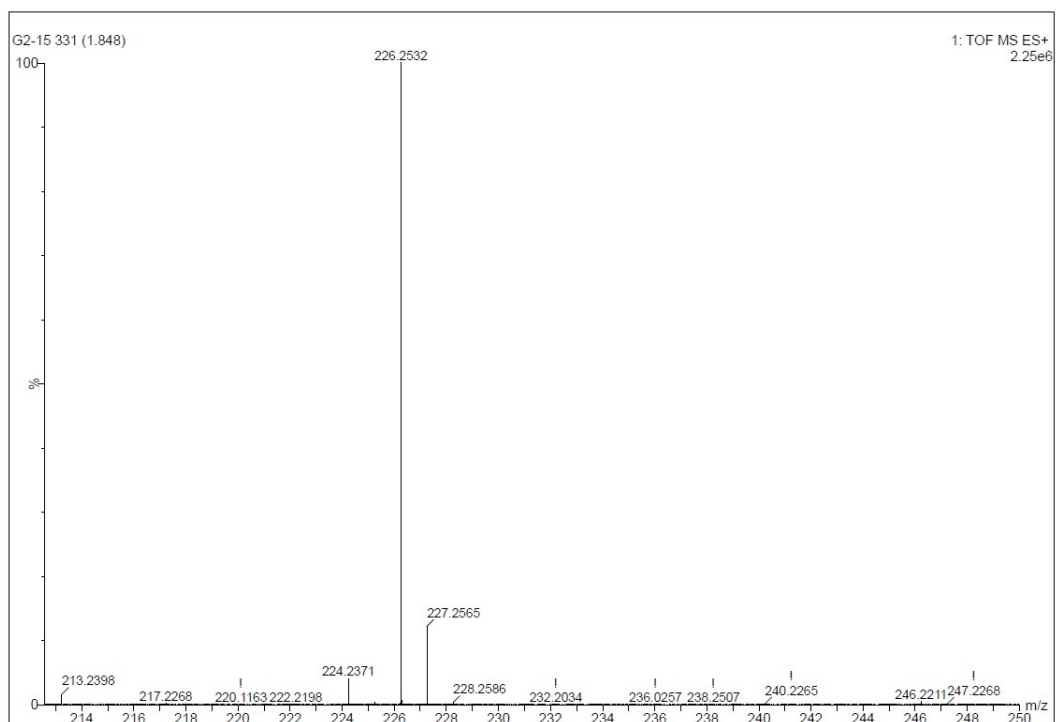

**Figure 69** HRMS spectrum of compound **3o**

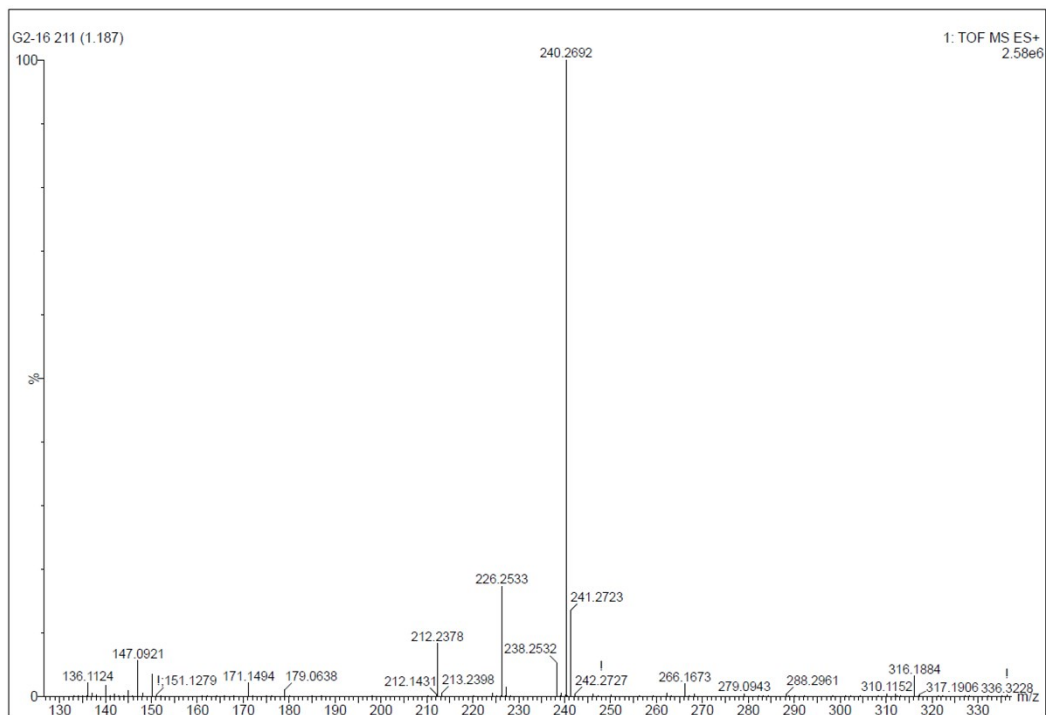

**Figure 70** HRMS spectrum of compound **3p**

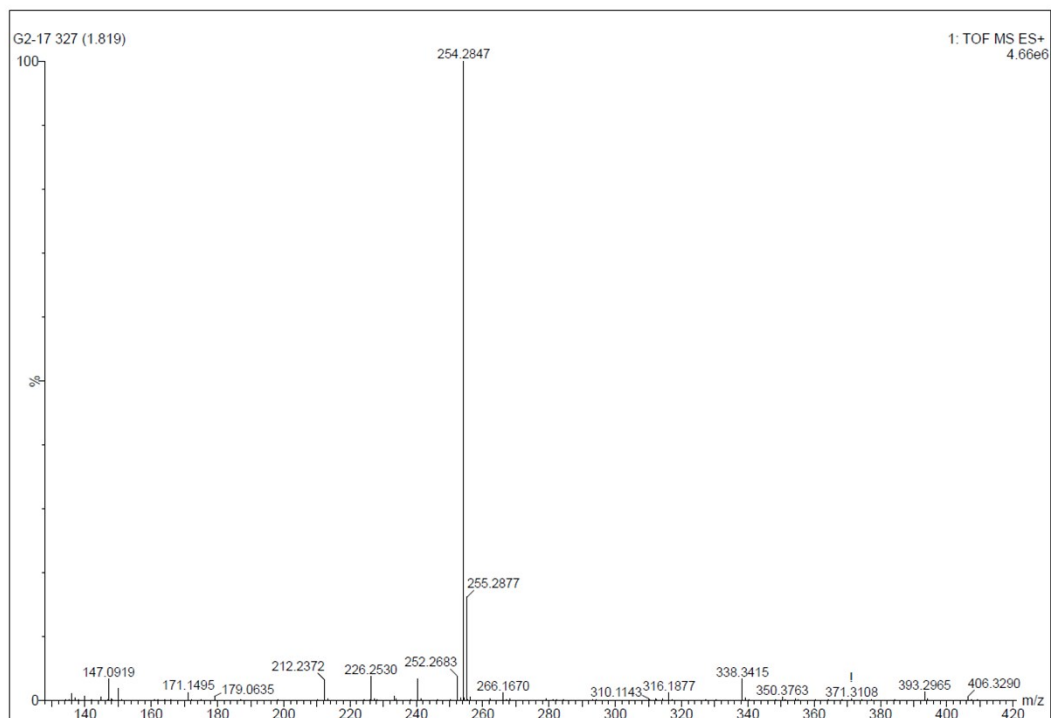

**Figure 71** HRMS spectrum of compound **3q**

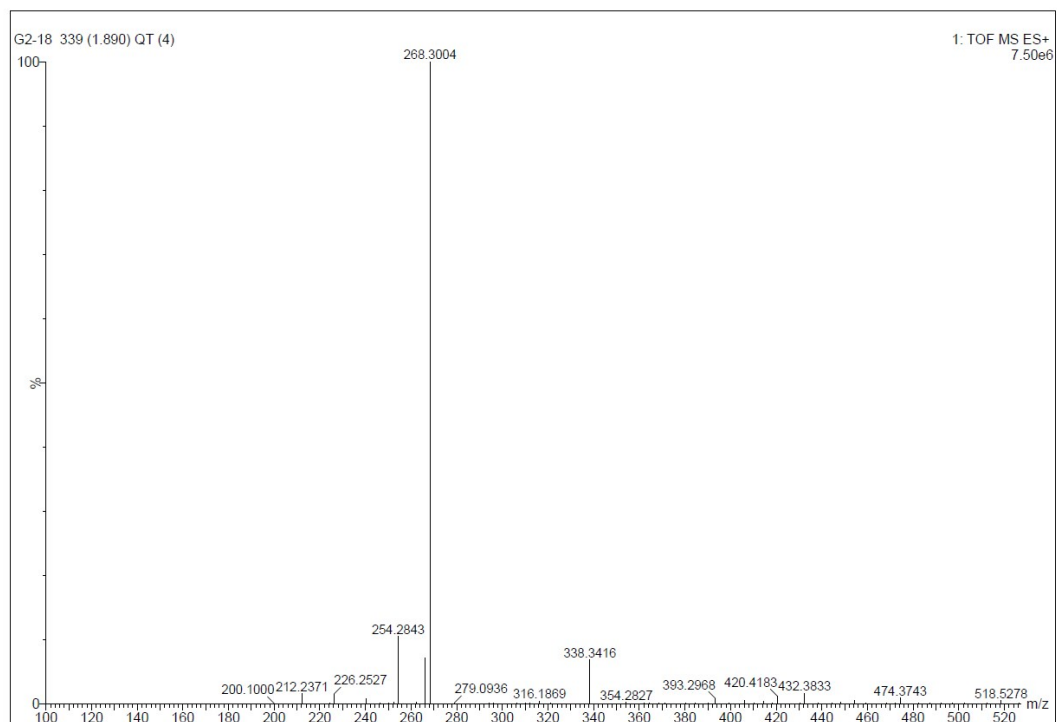

**Figure 72** HRMS spectrum of compound **3r**

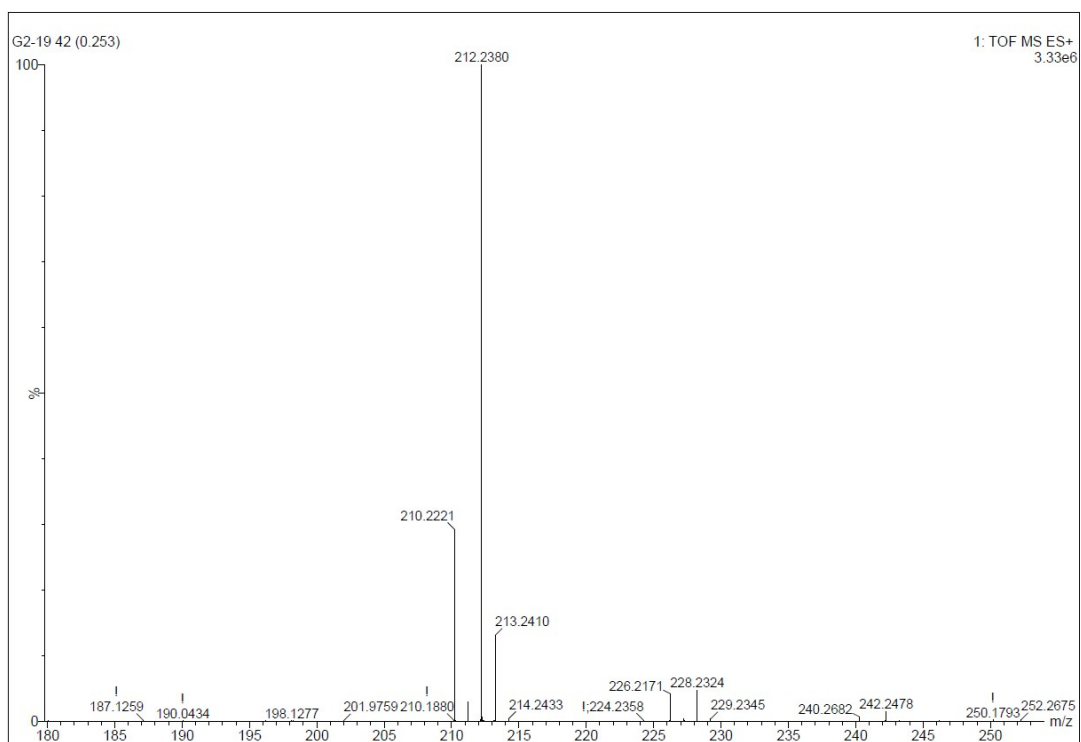

**Figure 73** HRMS spectrum of compound **3s**

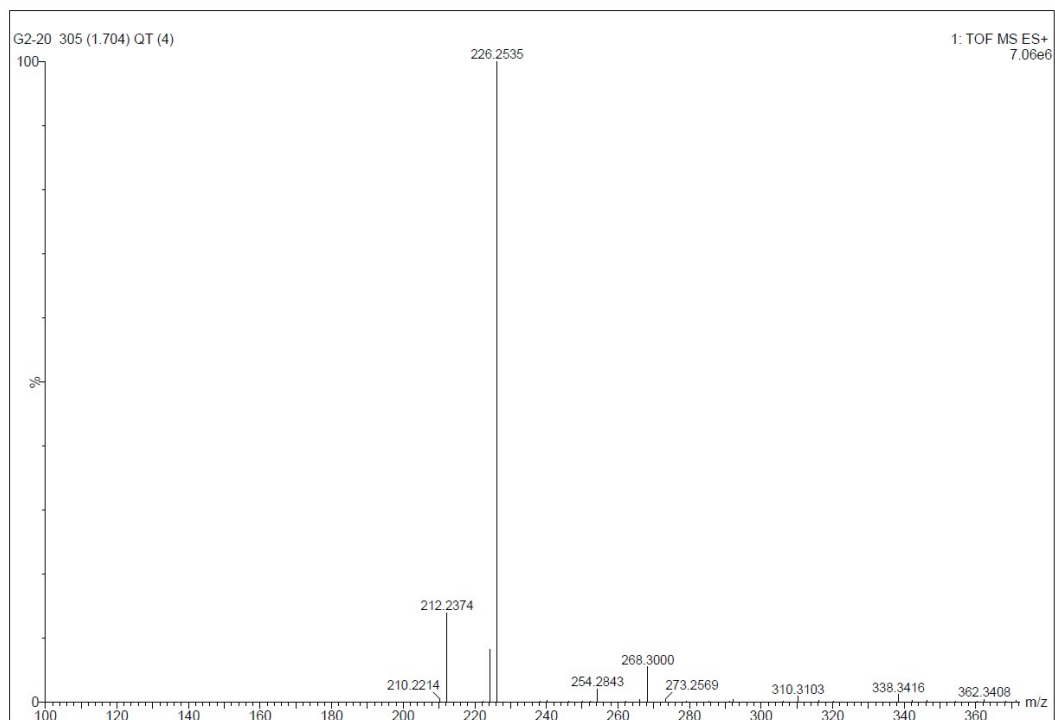

**Figure 74** HRMS spectrum of compound **3t**

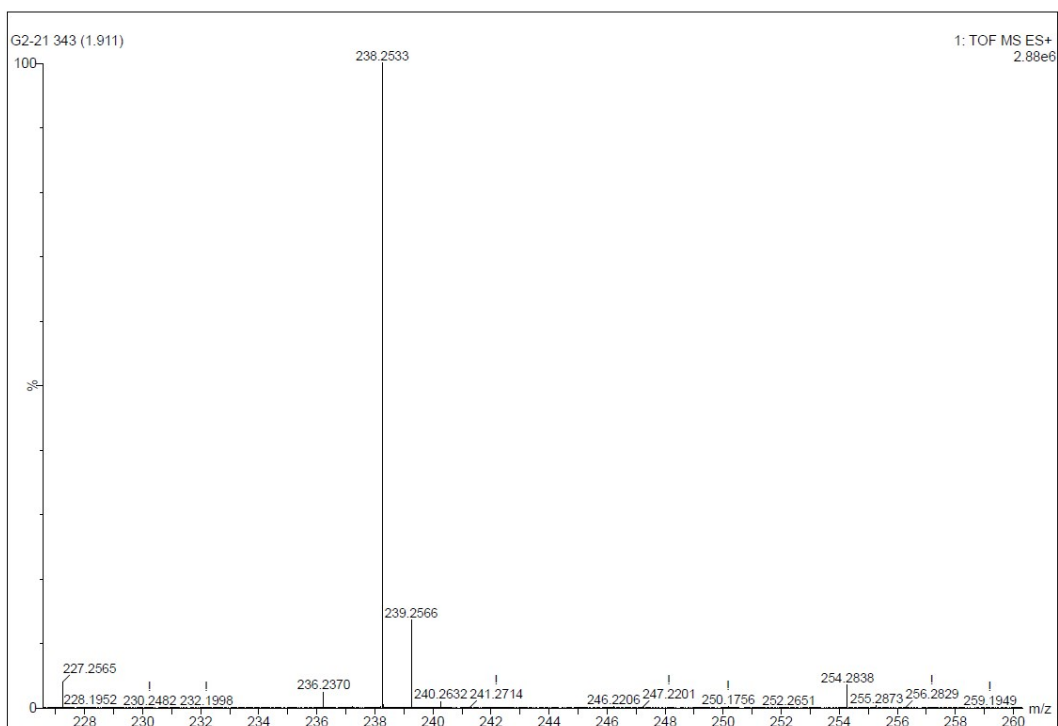

**Figure 75** HRMS spectrum of compound **3u**

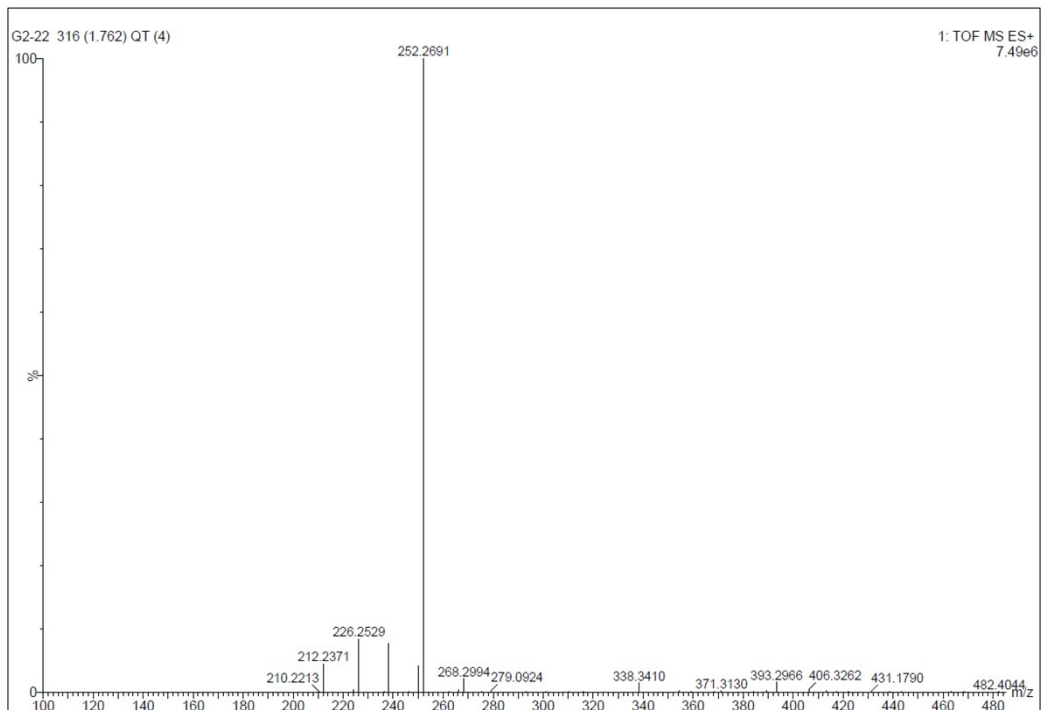

**Figure 76** HRMS spectrum of compound **3v**

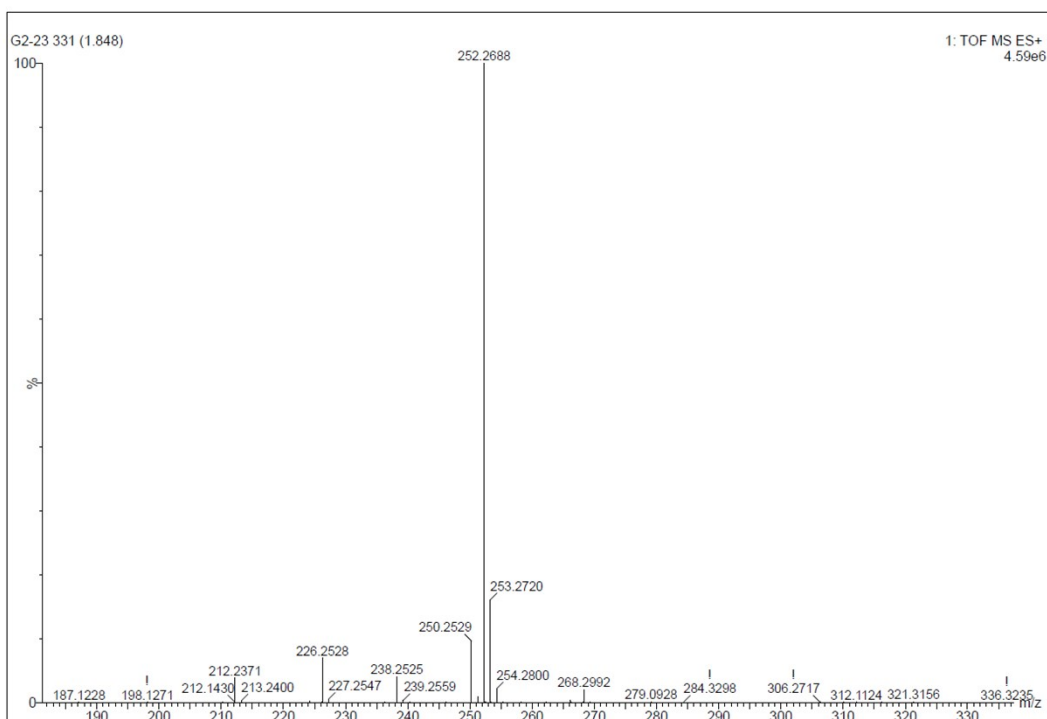

**Figure 77** HRMS spectrum of compound **3w**

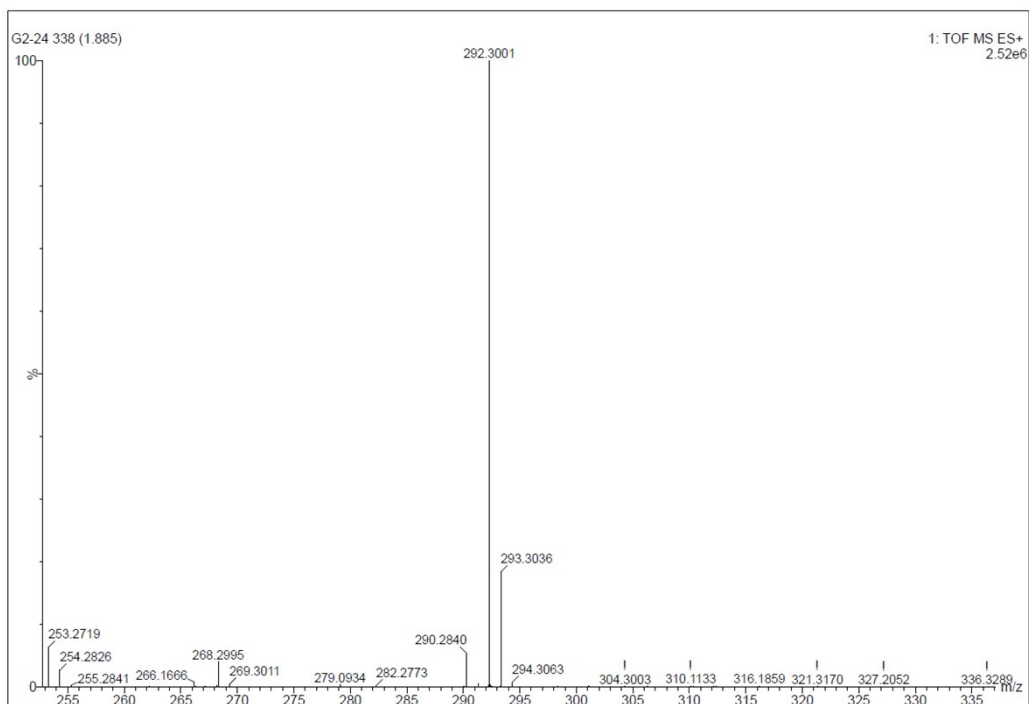

**Figure 78** HRMS spectrum of compound **3x**

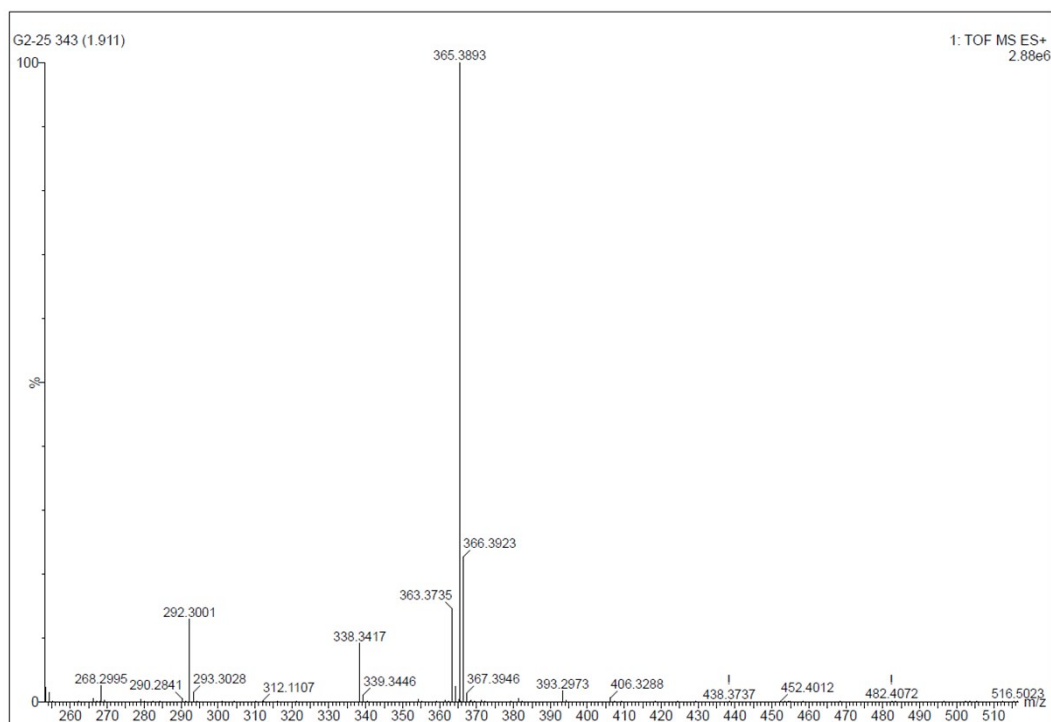

**Figure 79** HRMS spectrum of compound **3y**



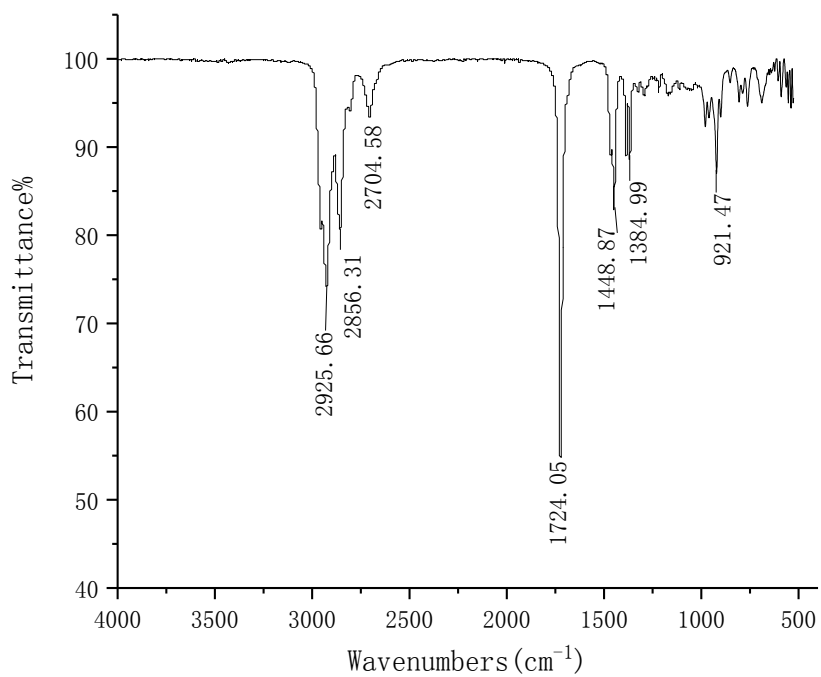

**Figure S80** IR spectrum of compound **2**

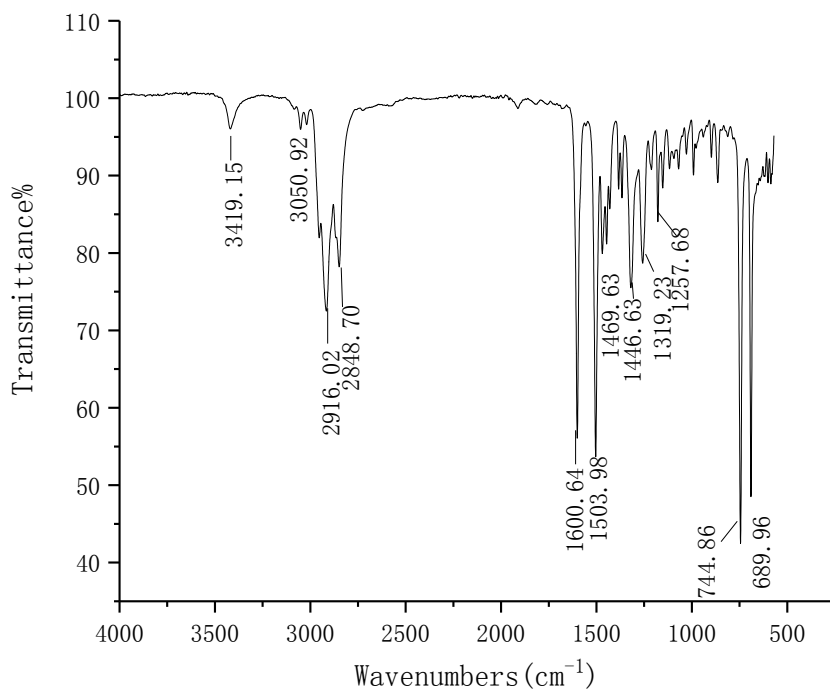

**Figure S81** IR spectrum of compound **3a**

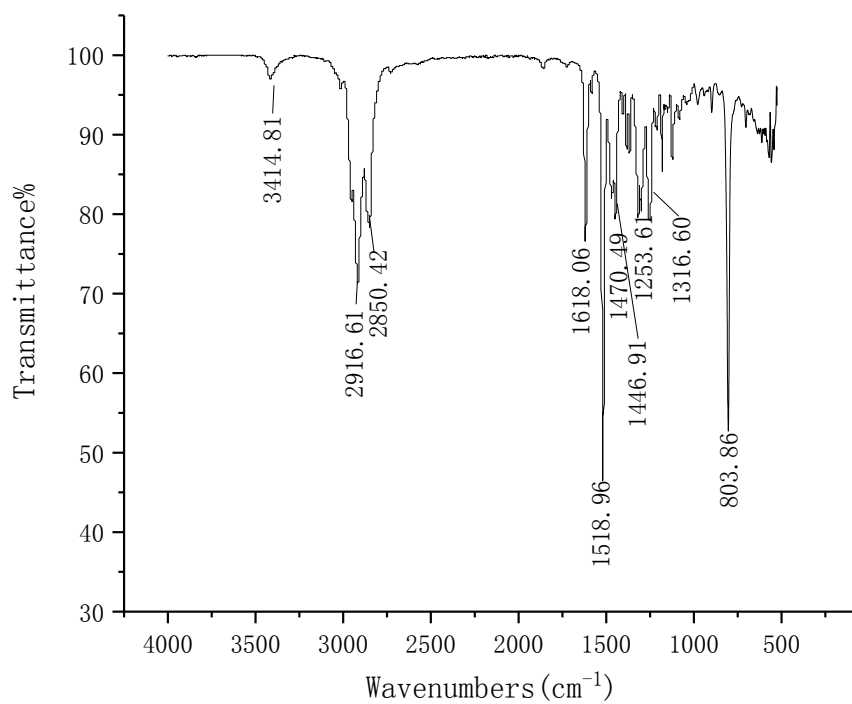

**Figure S82** IR spectrum of compound **3b**

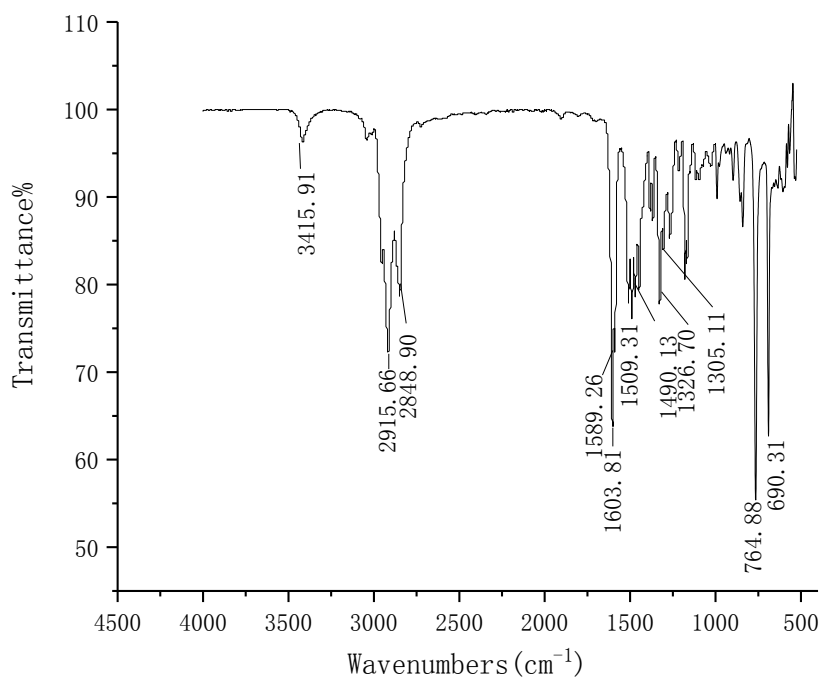

**Figure S83** IR spectrum of compound **3c**

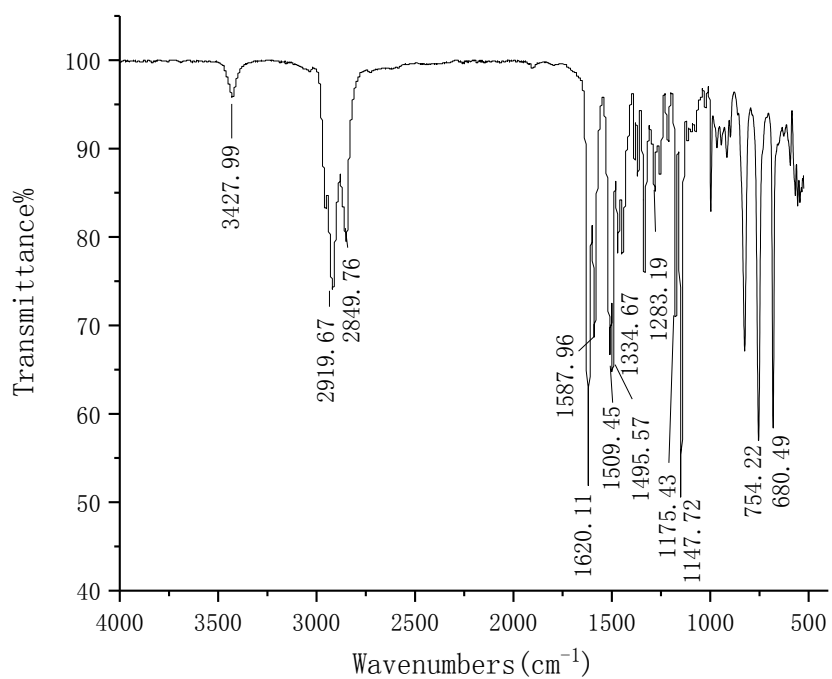

**Figure S84** IR spectrum of compound **3d**

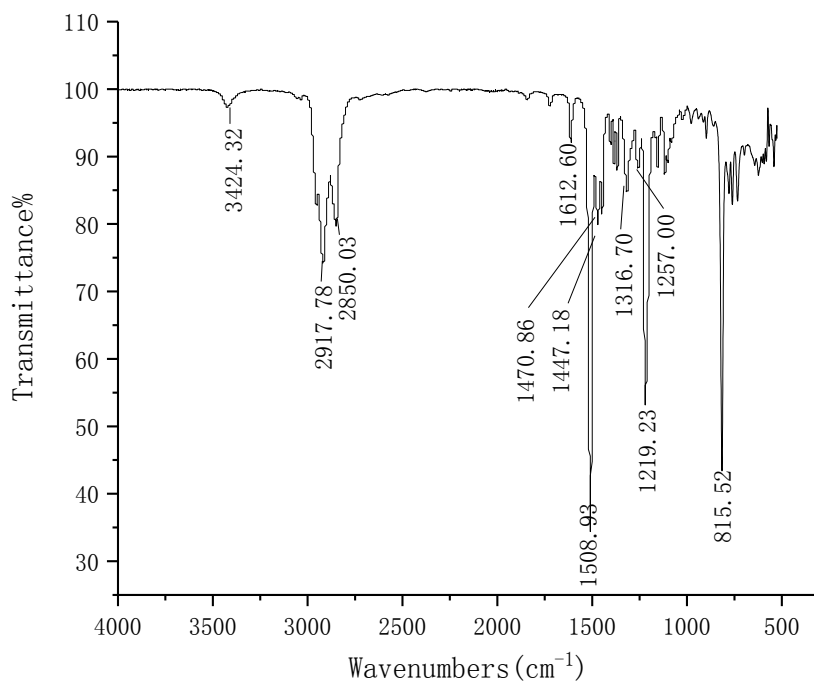

**Figure 85** IR spectrum of compound **3e**

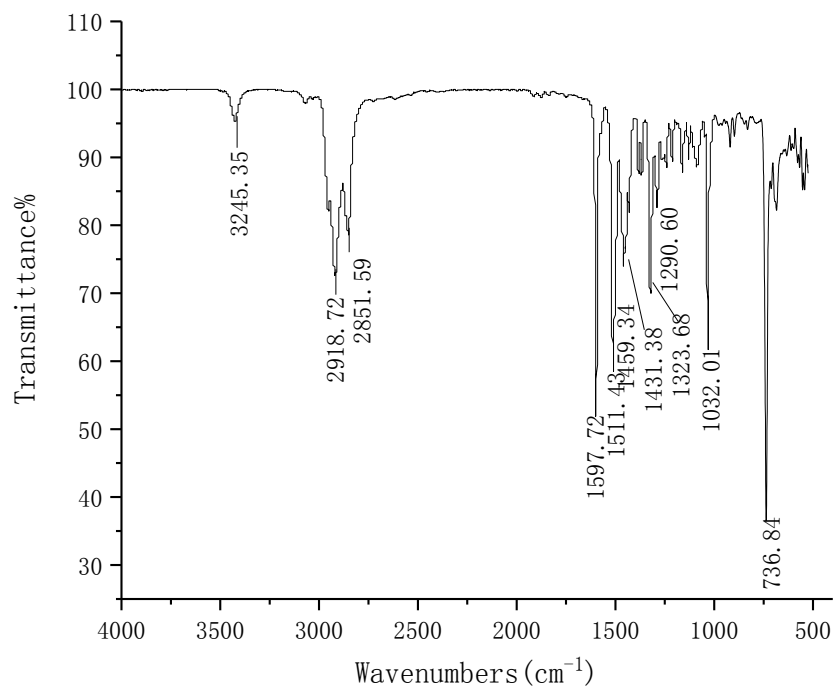

**Figure S86** IR spectrum of compound **3f**

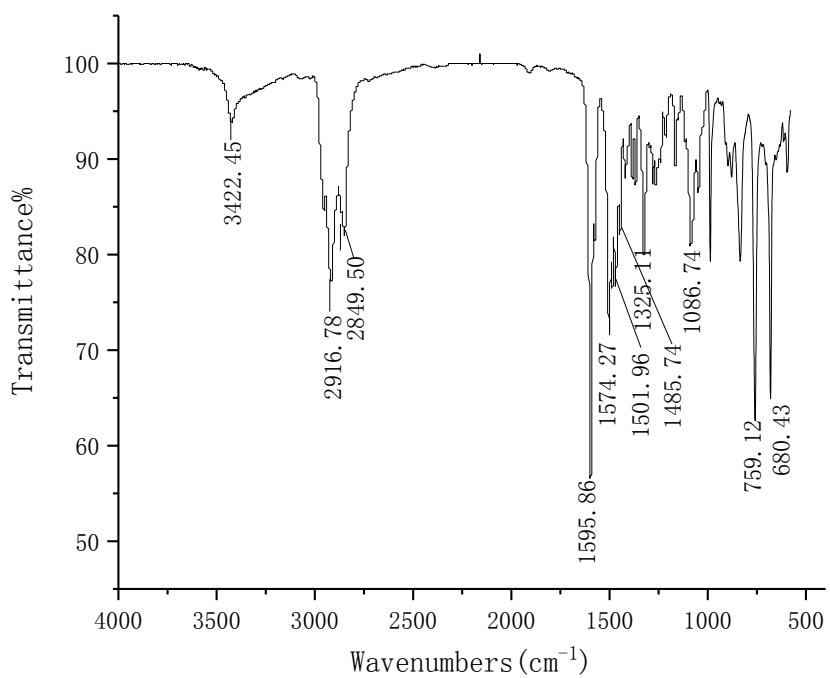

**Figure S87** IR spectrum of compound **3g**

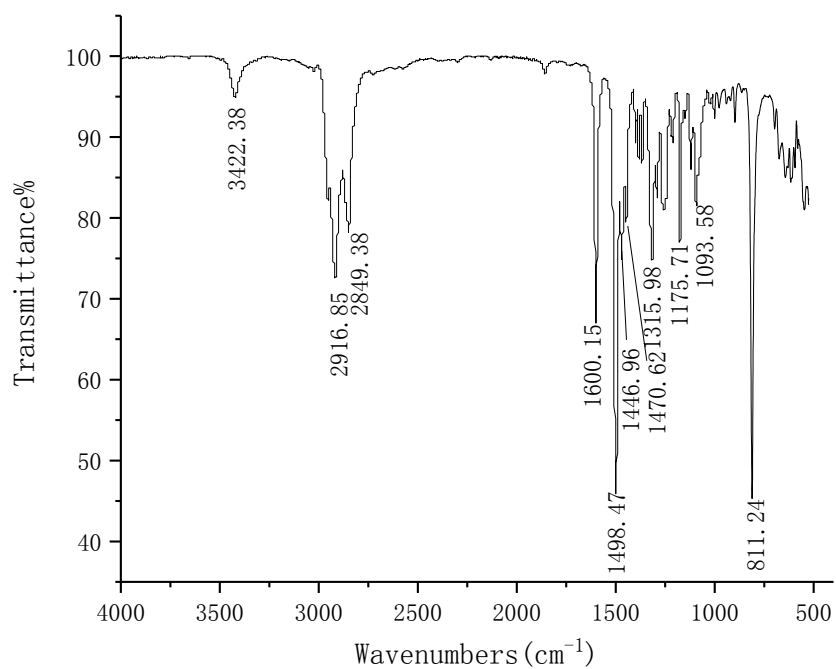

**Figure S88** IR spectrum of compound **3h**

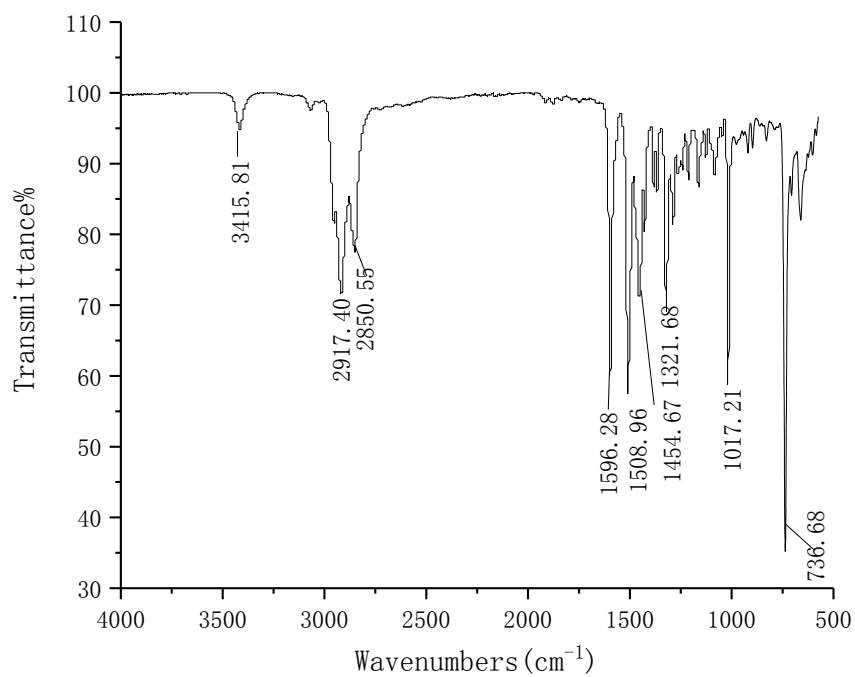

**Figure S89** IR spectrum of compound **3i**

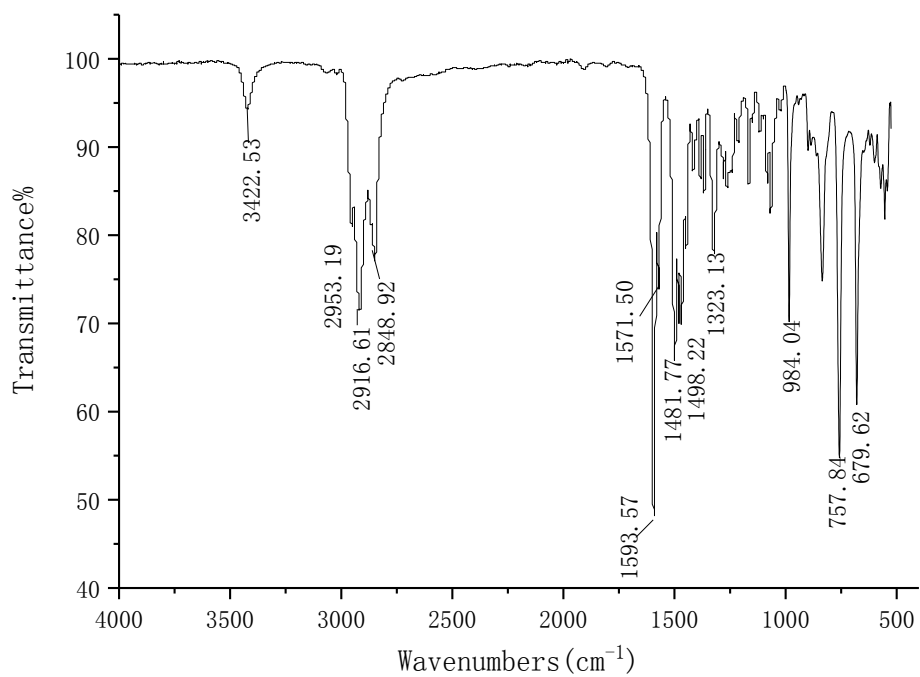

**Figure S90** IR spectrum of compound **3j**

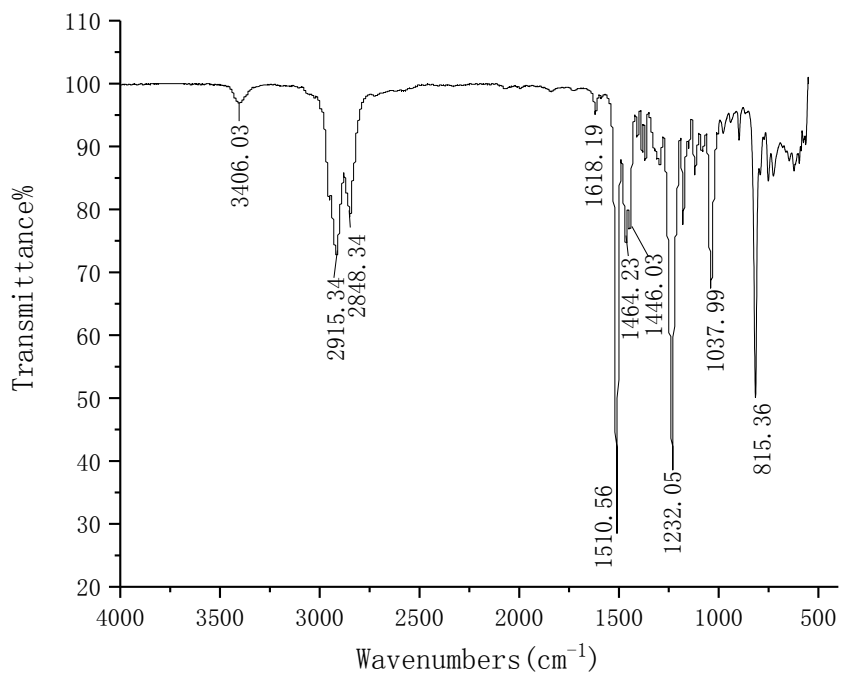

**Figure S91** IR spectrum of compound **3k**

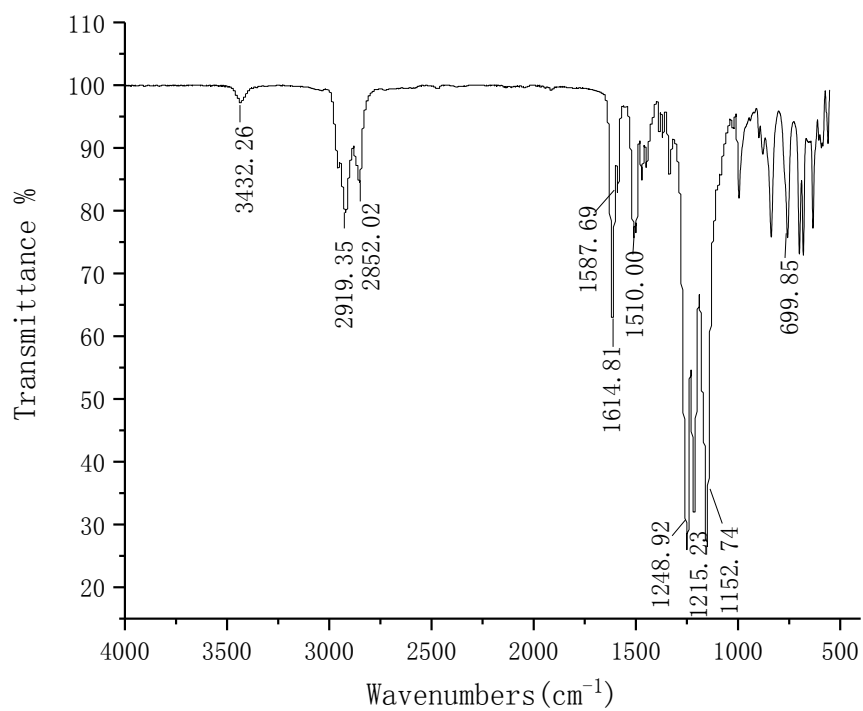

**Figure S92** IR spectrum of compound **31**

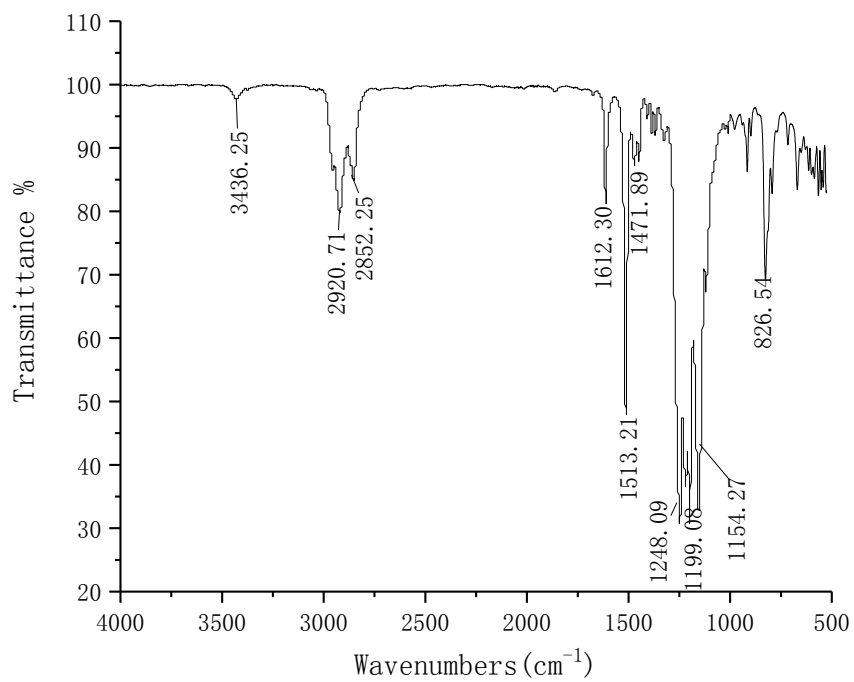

**Figure S93** IR spectrum of compound **3m**

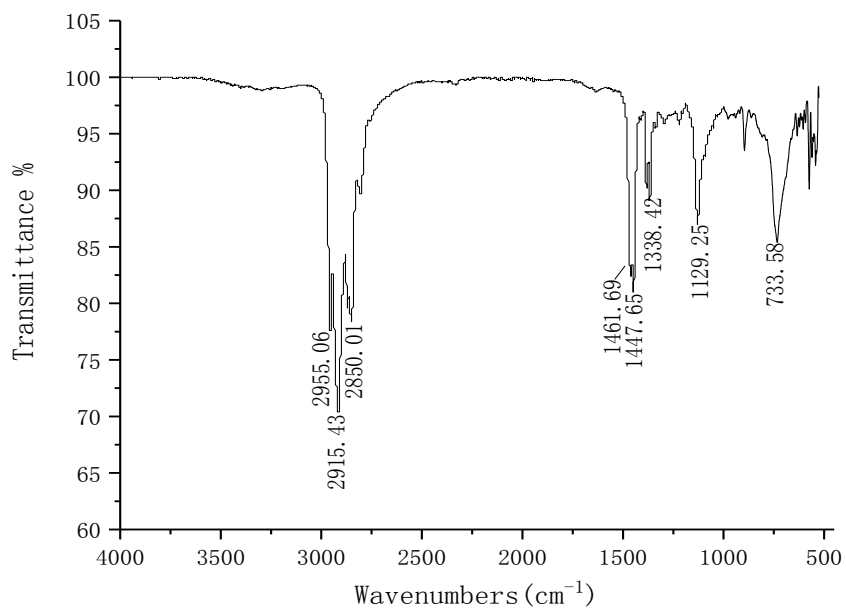

**Figure S94** IR spectrum of compound **3n**

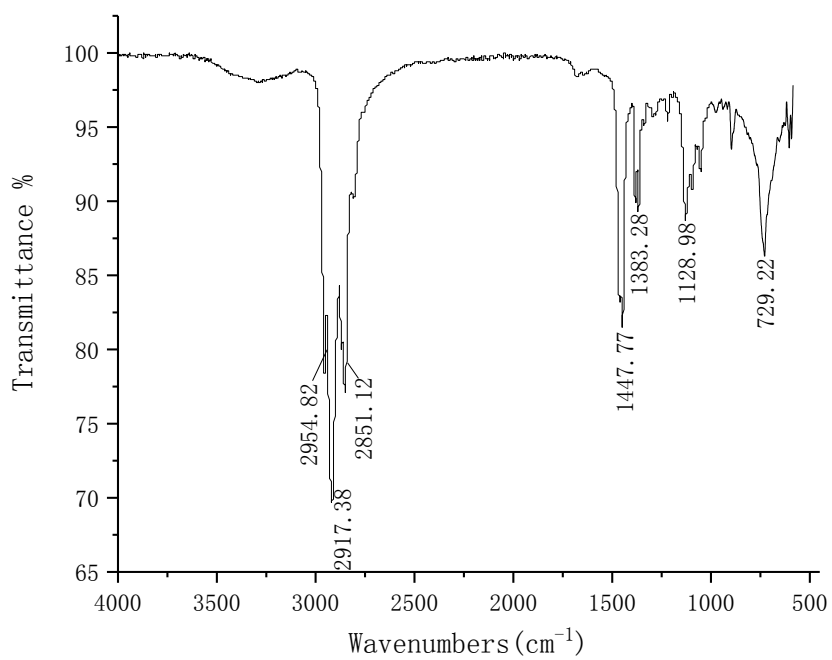

**Figure S95** IR spectrum of compound **3o**



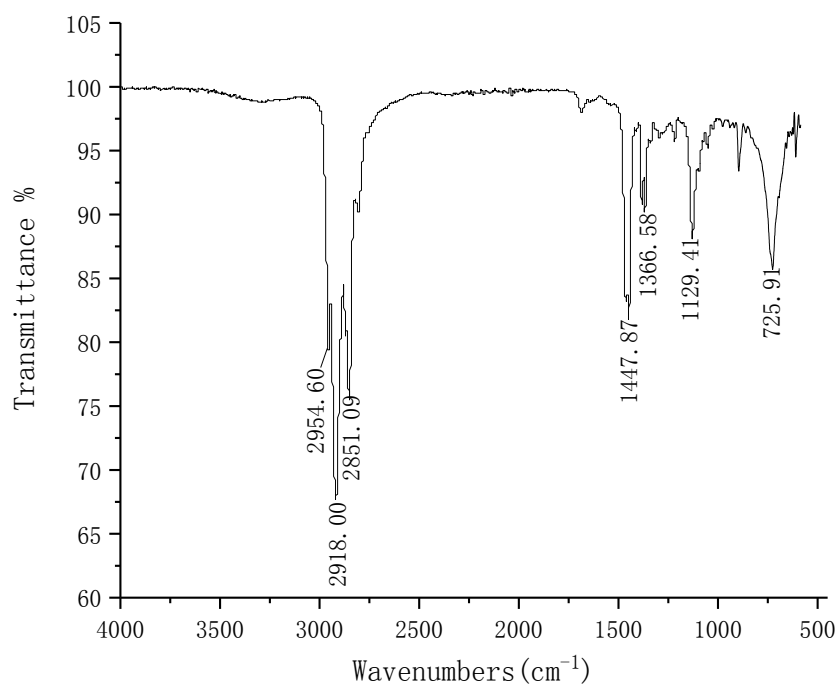

**Figure S96** IR spectrum of compound **3p**

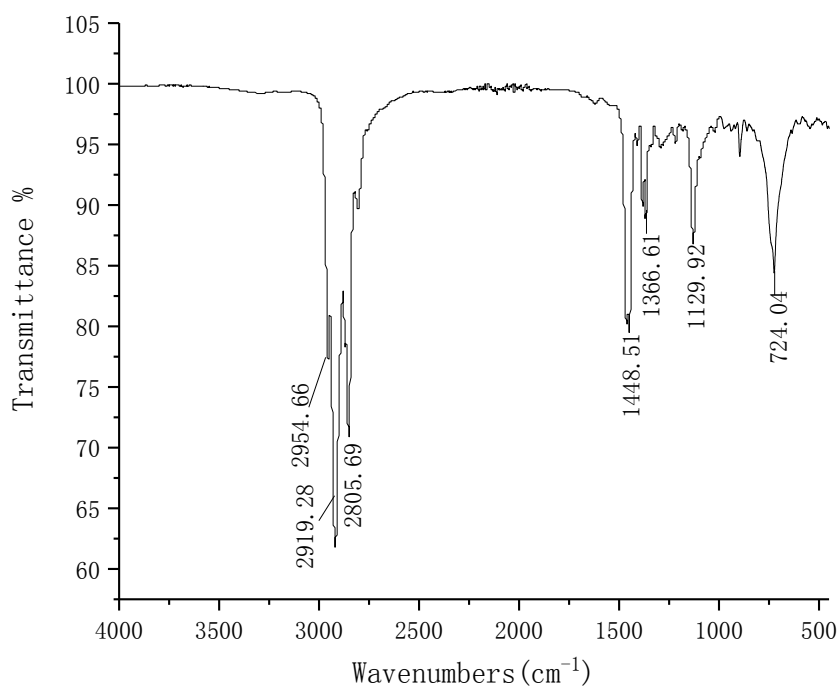

**Figure S97** spectrum of compound **3q**

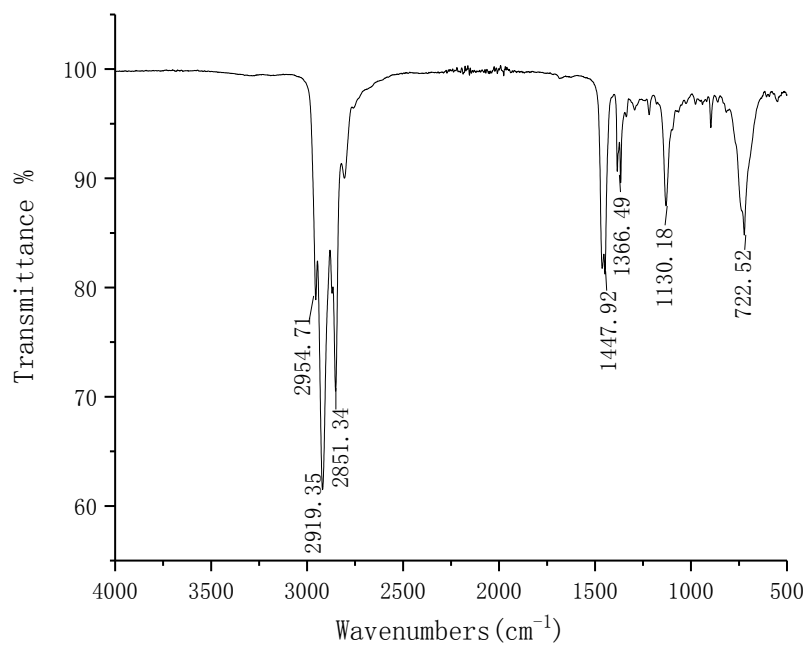

**Figure S98** IR spectrum of compound **3r**

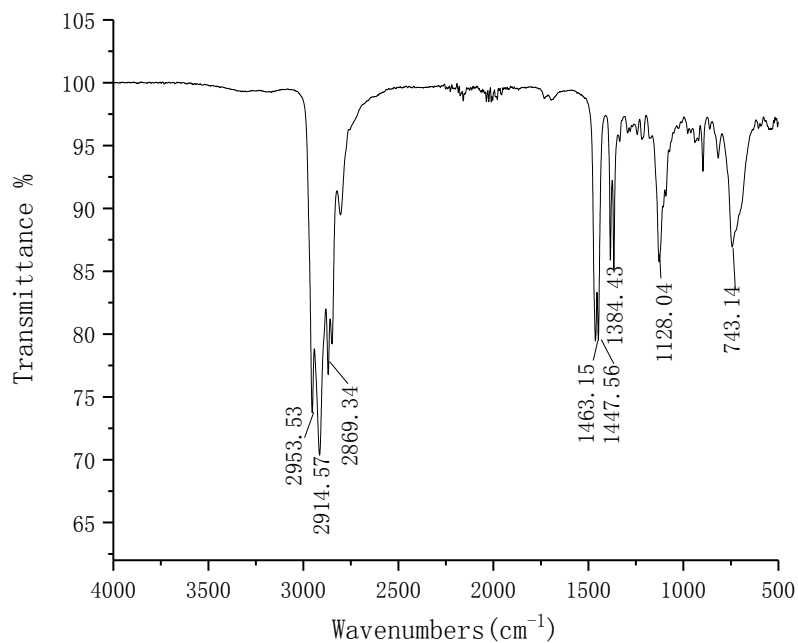

**Figure S99** IR spectrum of compound **3s**

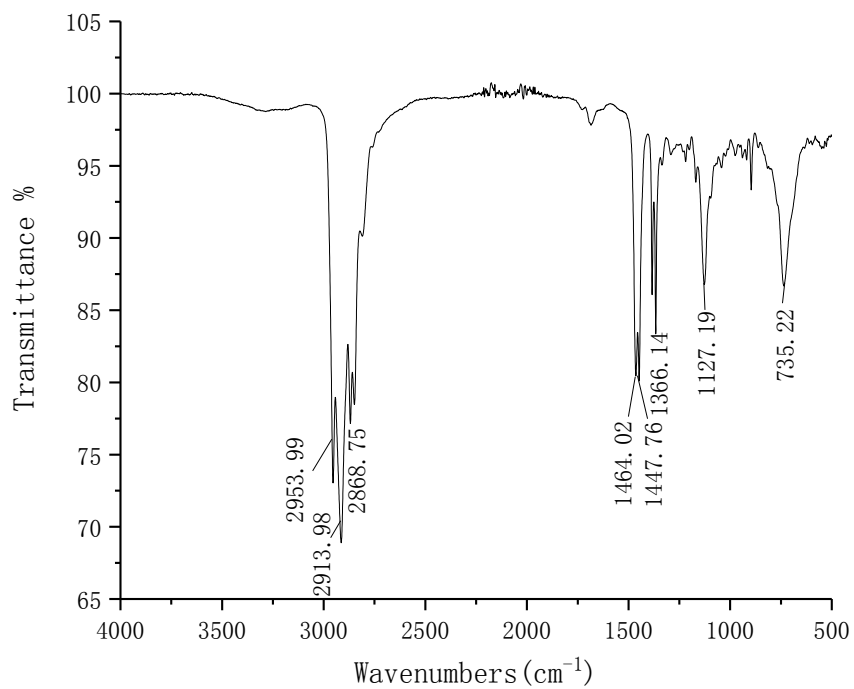

**Figure S100** IR spectrum of compound **3t**

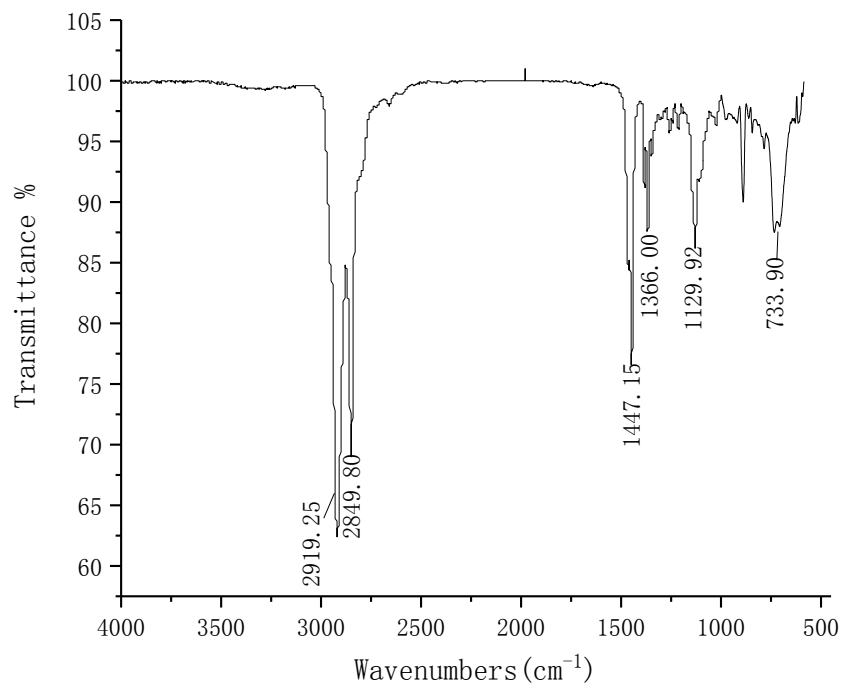

**Figure S101** IR spectrum of compound **3u**

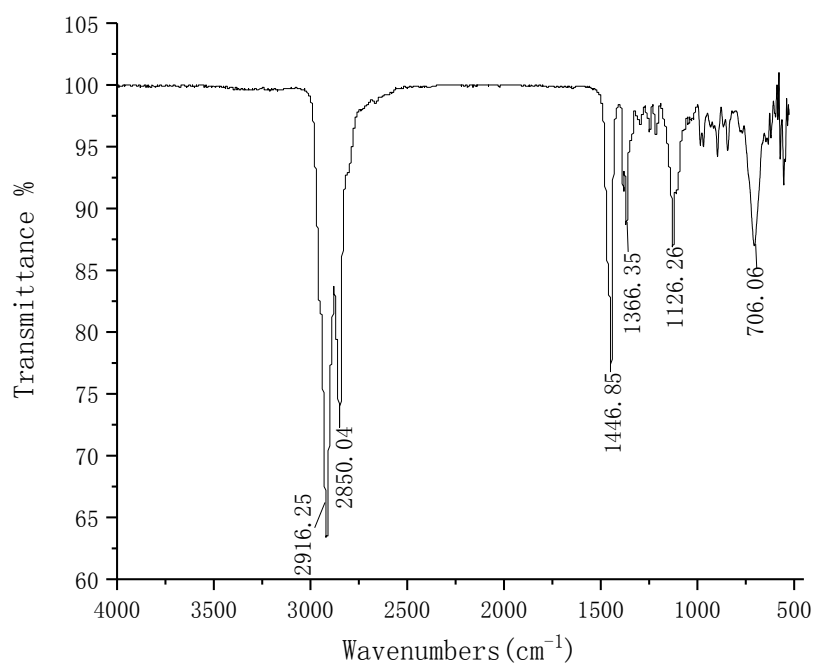

**Figure S102** IR spectrum of compound **3v**

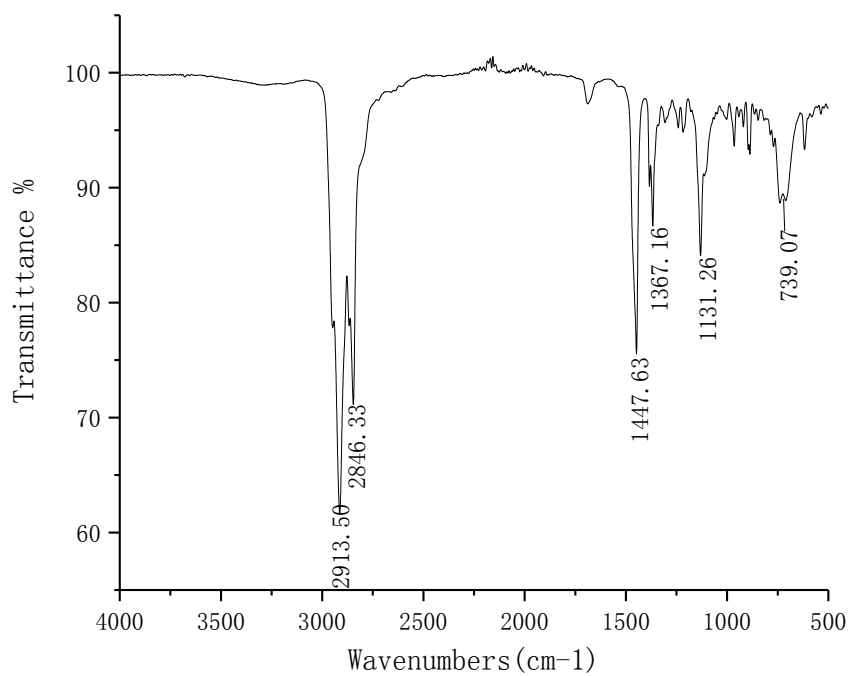

**Figure S103** IR spectrum of compound **3w**

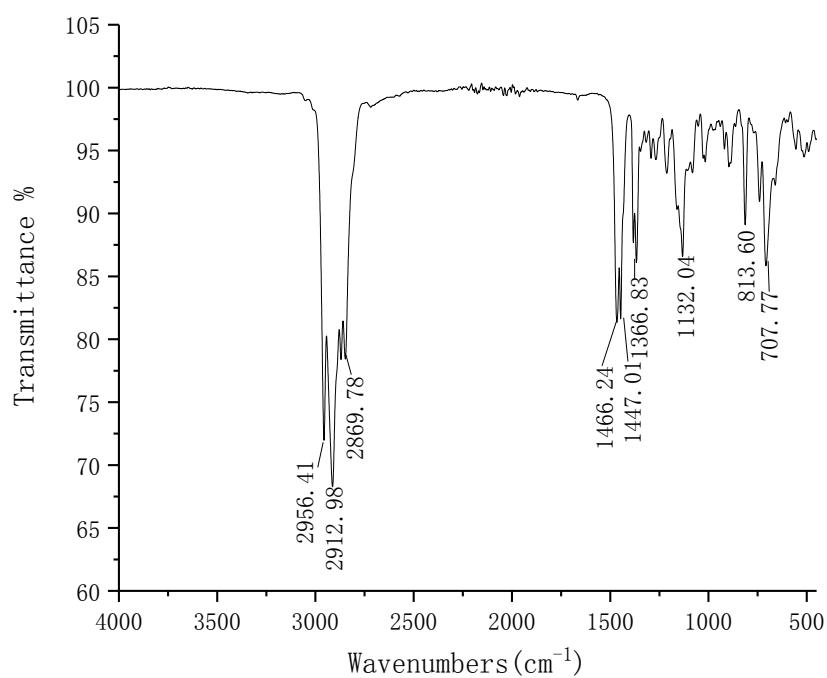

**Figure S104** IR spectrum of compound **3x**

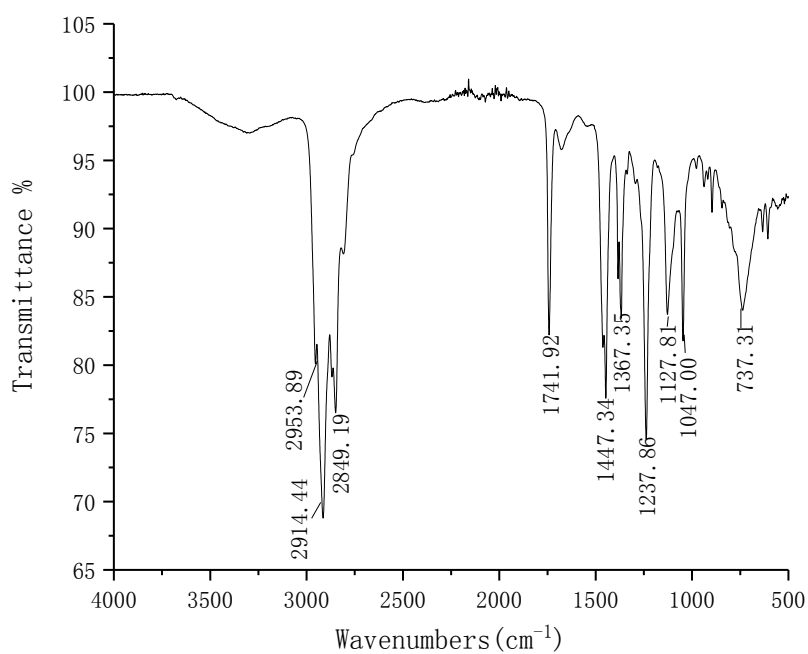

**Figure S105** IR spectrum of compound **3y**

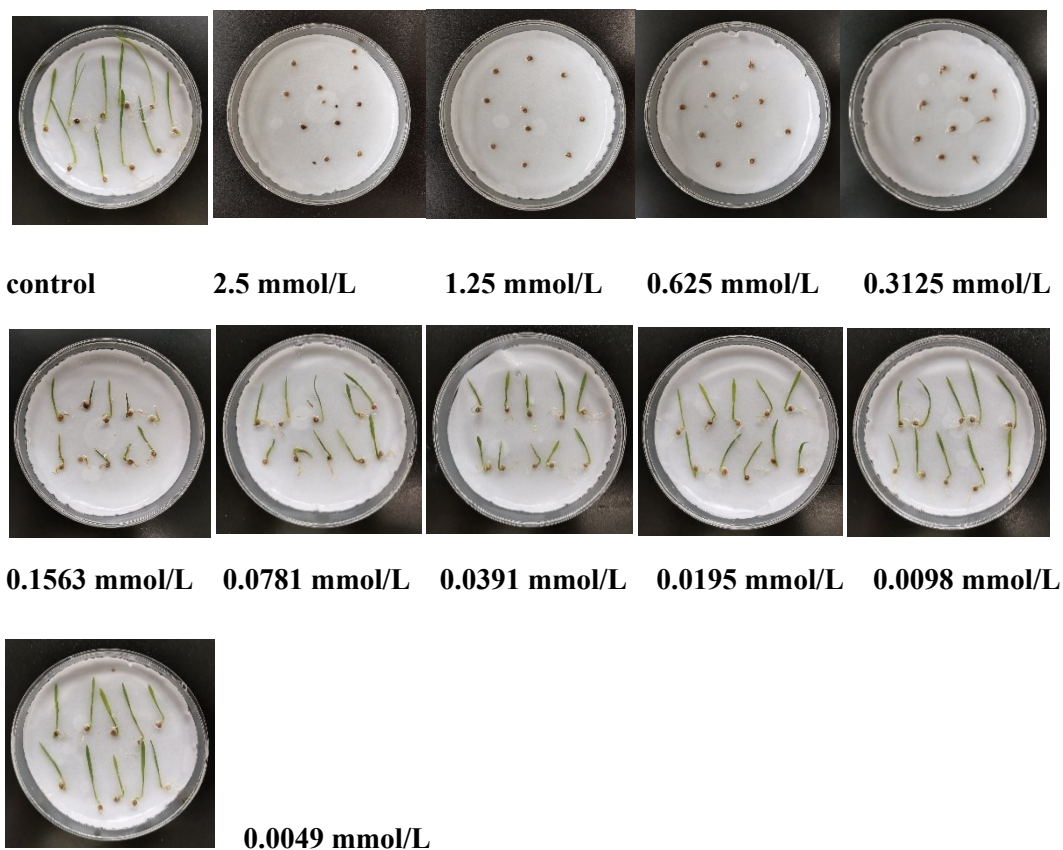

**Figure 106** Herbicidal effect of compound **3u** on barnyard grass. (When the solution concentration was 0.1563, 0.0781, 0.0391, 0.0195, 0.0098 and 0.0049 mmol/L, the inhibition rates of root growth were 81.5%, 72.6%, 66.5%, 60.3%, 53.6%, 46.9% respectively, the inhibition rates of shoot growth were 54.1%, 50.3%, 35.5%, 26.2%, 19.3%, 0, respectively.)

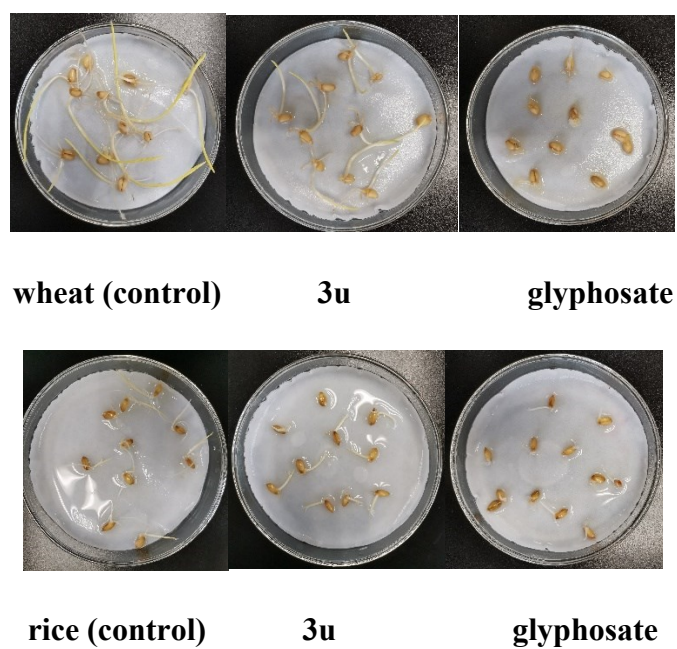

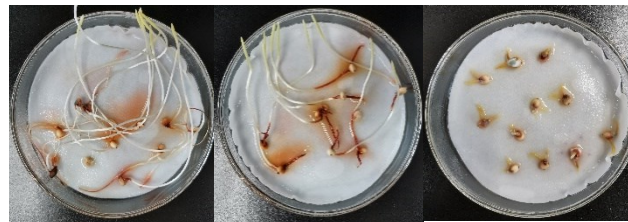

**sorghum (control)      3u      glyphosate**

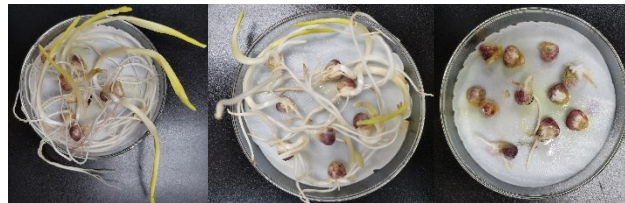

**maize (control)      3u      glyphosate**

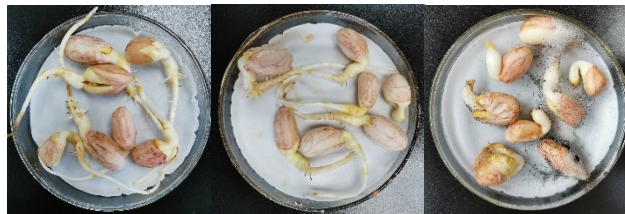

**peanut (control)      3u      glyphosate**

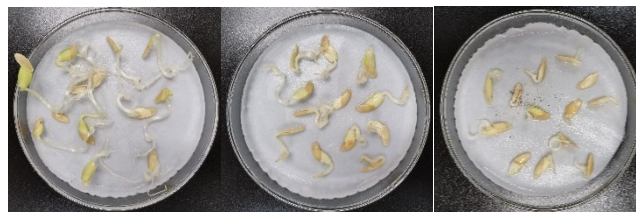

**cucumber (control)      3u      glyphosate**

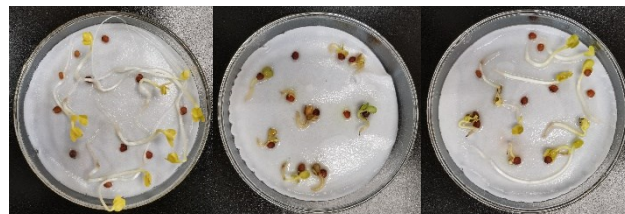

**radish (control)      3u      glyphosate**

**Figure 107** Crop safety of 3u and glyphosate by preemergent application on wheat, rice, sorghum, maize, peanut, cucumber and radish at 100 mg/L.

**Table S3** Inhibition rates of **3a-3m** against root growth of barnyard grass

| Compd.            | 5.00 <sup>a</sup> | 2.50  | 1.25  | 0.625 | 0.313 | 0.156 | 0.078 | 0.039    | 0.0195   | 0.0098   | 0.0049   |
|-------------------|-------------------|-------|-------|-------|-------|-------|-------|----------|----------|----------|----------|
| <b>1</b>          | 100.0             | 81.2  | 54.3  | 53.4  | 48.5  | 21.5  | 20.2  | <i>b</i> | <i>b</i> | <i>b</i> | <i>b</i> |
| <b>2</b>          | 82.2              | 45.4  | 3.3   | 5.0   | 9.6   | 7.2   | 0.1   | <i>b</i> | <i>b</i> | <i>b</i> | <i>b</i> |
| <b>3a</b>         | -12.6             | -1.7  | -2.5  | -2.6  | -6.7  | -4.7  | -5.5  | <i>b</i> | <i>b</i> | <i>b</i> | <i>b</i> |
| <b>3b</b>         | 16.2              | 16.1  | 14.5  | 13.3  | 17.6  | 13.8  | 17.3  | <i>b</i> | <i>b</i> | <i>b</i> | <i>b</i> |
| <b>3c</b>         | 23.5              | 26.1  | 17.2  | 16.2  | 19.6  | 14.6  | 17.9  | <i>b</i> | <i>b</i> | <i>b</i> | <i>b</i> |
| <b>3d</b>         | -7.5              | -6.6  | -6.4  | -2.6  | -1.5  | 0.1   | -1.1  | <i>b</i> | <i>b</i> | <i>b</i> | <i>b</i> |
| <b>3e</b>         | 22.5              | -2.5  | -2.0  | -3.7  | -1.2  | -0.6  | -5.5  | <i>b</i> | <i>b</i> | <i>b</i> | <i>b</i> |
| <b>3f</b>         | -1.5              | -1.8  | -2.4  | -1.1  | -2.9  | -0.5  | -0.2  | <i>b</i> | <i>b</i> | <i>b</i> | <i>b</i> |
| <b>3g</b>         | 7.3               | 1.4   | 1.3   | 1.0   | -0.9  | -1.3  | -0.6  | <i>b</i> | <i>b</i> | <i>b</i> | <i>b</i> |
| <b>3h</b>         | -22.4             | -35.4 | -20.2 | -21.6 | -8.5  | -17.5 | -14.5 | <i>b</i> | <i>b</i> | <i>b</i> | <i>b</i> |
| <b>3i</b>         | 5.5               | 4.8   | 3.4   | 5.3   | 5.1   | 5.0   | 2.4   | <i>b</i> | <i>b</i> | <i>b</i> | <i>b</i> |
| <b>3j</b>         | -7.7              | -8.1  | -9.0  | -6.2  | -7.6  | -1.1  | -3.1  | <i>b</i> | <i>b</i> | <i>b</i> | <i>b</i> |
| <b>3k</b>         | 13.1              | 12.1  | -0.4  | 2.9   | -1.5  | -3.5  | -2.7  | <i>b</i> | <i>b</i> | <i>b</i> | <i>b</i> |
| <b>3l</b>         | 5.6               | 7.7   | 5.1   | 8.9   | 9.3   | 10.2  | 9.8   | <i>b</i> | <i>b</i> | <i>b</i> | <i>b</i> |
| <b>3m</b>         | -18.4             | -17.0 | -12.4 | -12.8 | -10.6 | -6.7  | -1.9  | <i>b</i> | <i>b</i> | <i>b</i> | <i>b</i> |
| <b>Diuron</b>     | <i>c</i>          | 97.0  | 95.4  | 94.7  | 93.6  | 89.9  | 53.1  | 29.6     | 17.6     | 15.5     | 10.6     |
| <b>Glyphosate</b> | <i>c</i>          | 100.0 | 99.8  | 92.3  | 83.9  | 79.6  | 69.5  | 43.9     | 24.9     | 16.6     | 8.9      |

a. The data in this line are the concentrations of different *sec-p*-menthane-7-amine derivatives solutions (mmol/L); b. Have no inhibition activity at this concentration; c. The data at this concentration were not determined.

**Table S4** Inhibition rates of **3a-3m** against shoot growth of barnyard grass

| Compd.            | 5.00 <sup>a</sup> | 2.50 | 1.25 | 0.625 | 0.313 | 0.156 | 0.078 | 0.039    | 0.0195   | 0.0098   | 0.0049   |
|-------------------|-------------------|------|------|-------|-------|-------|-------|----------|----------|----------|----------|
| <b>1</b>          | 100.0             | 76.4 | 59.5 | 32.1  | 25.1  | 20.1  | 17.5  | <i>b</i> | <i>b</i> | <i>b</i> | <i>b</i> |
| <b>2</b>          | 77.6              | 38.8 | 13.6 | 6.8   | 1.7   | 2.7   | 3.3   | <i>b</i> | <i>b</i> | <i>b</i> | <i>b</i> |
| <b>3a</b>         | 46.9              | 49.0 | 48.9 | 48.1  | 40.0  | 19.6  | 5.4   | <i>b</i> | <i>b</i> | <i>b</i> | <i>b</i> |
| <b>3b</b>         | 52.3              | 48.3 | 55.5 | 43.8  | 40.6  | 31.9  | 25.4  | <i>b</i> | <i>b</i> | <i>b</i> | <i>b</i> |
| <b>3c</b>         | 65.9              | 60.7 | 58.9 | 51.1  | 49.2  | 39.2  | 29.7  | <i>b</i> | <i>b</i> | <i>b</i> | <i>b</i> |
| <b>3d</b>         | 26.6              | 19.0 | 17.0 | 17.5  | 6.7   | 9.8   | 9.5   | <i>b</i> | <i>b</i> | <i>b</i> | <i>b</i> |
| <b>3e</b>         | 42.3              | 43.5 | 44.6 | 39.2  | 39.8  | 35.1  | 34.7  | <i>b</i> | <i>b</i> | <i>b</i> | <i>b</i> |
| <b>3f</b>         | 9.6               | 4.0  | 2.2  | 4.1   | -1.5  | -0.9  | -0.5  | <i>b</i> | <i>b</i> | <i>b</i> | <i>b</i> |
| <b>3g</b>         | 21.6              | 20.1 | 26.6 | 29.9  | 24.2  | 26.1  | 23.4  | <i>b</i> | <i>b</i> | <i>b</i> | <i>b</i> |
| <b>3h</b>         | 39.8              | 33.4 | 29.2 | 23.0  | 18.9  | 18.2  | 17.0  | <i>b</i> | <i>b</i> | <i>b</i> | <i>b</i> |
| <b>3i</b>         | 7.1               | 6.5  | 3.4  | 4.2   | 3.7   | 5.7   | 2.2   | <i>b</i> | <i>b</i> | <i>b</i> | <i>b</i> |
| <b>3j</b>         | 16.7              | 12.2 | 18.3 | 14.6  | 17.7  | 17.6  | 16.3  | <i>b</i> | <i>b</i> | <i>b</i> | <i>b</i> |
| <b>3k</b>         | 64.0              | 56.9 | 48.9 | 43.1  | 43.0  | 28.7  | 15.3  | <i>b</i> | <i>b</i> | <i>b</i> | <i>b</i> |
| <b>3l</b>         | 23.0              | 24.2 | 20.0 | 23.8  | 23.2  | 14.1  | 11.6  | <i>b</i> | <i>b</i> | <i>b</i> | <i>b</i> |
| <b>3m</b>         | 34.4              | 34.3 | 29.7 | 29.6  | 28.8  | 28.0  | 20.2  | <i>b</i> | <i>b</i> | <i>b</i> | <i>b</i> |
| <b>Diuron</b>     | <i>c</i>          | 27.3 | 26.3 | 20.8  | 24.9  | 14.0  | 12.3  | 13.4     | 10.5     | <i>b</i> | <i>b</i> |
| <b>Glyphosate</b> | <i>c</i>          | 97.5 | 91.9 | 77.2  | 64.0  | 54.1  | 38.5  | 12.2     | <i>b</i> | <i>b</i> | <i>b</i> |



**Table S5** Toxicity regression equations, IC<sub>50</sub> and IC<sub>90</sub> values of *sec-p*-menthane-7-amine derivatives against barnyard grass

| Compd.            | Root                         |                           |                           | Shoot                        |                           |                           |
|-------------------|------------------------------|---------------------------|---------------------------|------------------------------|---------------------------|---------------------------|
|                   | toxicity regression equation | IC <sub>50</sub> (mmol/L) | IC <sub>90</sub> (mmol/L) | toxicity regression equation | IC <sub>50</sub> (mmol/L) | IC <sub>90</sub> (mmol/L) |
| <b>1</b>          | y=5.1897+1.1352x<br>r=0.9676 | 0.6806                    | 9.1576                    | y=5.0693+1.1110x<br>r=0.9470 | 0.8663                    | >10                       |
| <b>2</b>          | y=2.8311+4.5866x<br>r=0.9899 | 2.9707                    | 5.6529                    | y=3.8474+2.5079x<br>r=0.9810 | 2.8812                    | 9.3447                    |
| <b>3n</b>         | y=6.8004+1.0800x<br>r=0.9111 | 0.0215                    | 0.3308                    | y=6.2555+1.5618x<br>r=0.9422 | 0.1571                    | 1.0391                    |
| <b>3o</b>         | y=6.6758+0.9094x<br>r=0.9199 | 0.0144                    | 0.3685                    | y=7.0860+2.0230x<br>r=0.8991 | 0.0931                    | 0.4002                    |
| <b>3p</b>         | y=7.1306+1.0353x<br>r=0.9644 | 0.0088                    | 0.1513                    | y=6.8404+1.8018x<br>r=0.9500 | 0.0952                    | 0.4896                    |
| <b>3q</b>         | y=7.1881+1.1279x<br>r=0.9616 | 0.0115                    | 0.1571                    | y=6.6932+1.7347x<br>r=0.9517 | 0.1057                    | 0.5790                    |
| <b>3r</b>         | y=7.2005+1.0730x<br>r=0.9952 | 0.0088                    | 0.1392                    | y=6.7264+1.8163x<br>r=0.9482 | 0.1121                    | 0.5690                    |
| <b>3s</b>         | y=6.8905+1.1140x<br>r=0.9630 | 0.0201                    | 0.2840                    | y=6.7917+1.8527x<br>r=0.9404 | 0.1079                    | 0.5305                    |
| <b>3t</b>         | y=7.2191+1.2369x<br>r=0.9290 | 0.0161                    | 0.1746                    | y=6.3324+1.4714x<br>r=0.9754 | 0.1243                    | 0.9235                    |
| <b>3u</b>         | y=6.7652+0.8596x<br>r=0.9411 | 0.0088                    | 0.2738                    | y=6.5213+1.2899x<br>r=0.9543 | 0.0662                    | 0.6518                    |
| <b>3v</b>         | y=7.2372+1.1474x<br>r=0.9250 | 0.0112                    | 0.1469                    | y=6.5438+1.1813x<br>r=0.9743 | 0.0493                    | 0.5998                    |
| <b>3w</b>         | y=6.9051+0.9267x<br>r=0.9737 | 0.0088                    | 0.2124                    | y=6.5685+1.4290x<br>r=0.9870 | 0.0799                    | 0.6298                    |
| <b>3x</b>         | y=7.6525+1.3639x<br>r=0.9641 | 0.0119                    | 0.1035                    | y=6.2278+1.0400x<br>r=0.9722 | 0.0701                    | 0.9822                    |
| <b>3y</b>         | y=7.9422+2.3376x<br>r=0.9937 | 0.0551                    | 0.1948                    | y=5.4980+2.0469x<br>r=0.9676 | 0.5711                    | 2.4142                    |
| <b>Diuron</b>     | y=6.7262+1.3525x<br>r=0.9612 | 0.0529                    | 0.4690                    | y=4.3081+0.3752x<br>r=0.9296 | >10                       | >10                       |
| <b>Glyphosate</b> | y=7.1288+1.5735x<br>r=0.9755 | 0.0444                    | 0.2894                    | y=6.2470+1.5890x<br>r=0.9890 | 0.1642                    | 1.0514                    |

**Table S6** Toxicity regression equations, IC<sub>50</sub> and IC<sub>90</sub> values of *sec-p*-menthane-7-amine derivatives against rape

| Compd.            | Root                          |                           |                           | Shoot                        |                           |                           |
|-------------------|-------------------------------|---------------------------|---------------------------|------------------------------|---------------------------|---------------------------|
|                   | toxicity regression equation  | IC <sub>50</sub> (mmol/L) | IC <sub>90</sub> (mmol/L) | toxicity regression equation | IC <sub>50</sub> (mmol/L) | IC <sub>90</sub> (mmol/L) |
| <b>1</b>          | y=5.9863+2.12498x<br>r=0.9875 | 0.3434                    | 1.3771                    | y=5.2749+1.2792x<br>r=0.9705 | 0.6097                    | 6.1230                    |
| <b>2</b>          | y=5.9569+1.6144x<br>r=0.9566  | 0.2554                    | 1.5888                    | y=5.2536+1.0121x<br>r=0.9230 | 0.5616                    | >10                       |
| <b>3n</b>         | y=7.4501+1.6788x<br>r=0.9852  | 0.0347                    | 0.2014                    | y=6.5488+1.5931x<br>r=0.9447 | 0.1066                    | 0.6796                    |
| <b>3o</b>         | y=7.7051+1.9394x<br>r=0.9694  | 0.0403                    | 0.1845                    | y=7.6037+3.2981x<br>r=0.9768 | 0.1624                    | 0.3973                    |
| <b>3p</b>         | y=8.1376+2.1619x<br>r=0.9916  | 0.0354                    | 0.1385                    | y=6.9255+2.3133x<br>r=0.9694 | 0.1471                    | 0.5268                    |
| <b>3q</b>         | y=7.9299+1.7905x<br>r=0.9746  | 0.0231                    | 0.1201                    | y=6.4436+1.5669x<br>r=0.9712 | 0.1199                    | 0.7881                    |
| <b>3r</b>         | y=7.7781+2.0589x<br>r=0.9717  | 0.0447                    | 0.1876                    | y=6.7737+2.1097x<br>r=0.9615 | 0.1443                    | 0.5844                    |
| <b>3s</b>         | y=6.9838+1.7680x<br>r=0.9936  | 0.0755                    | 0.4007                    | y=6.3232+1.6040x<br>r=0.9734 | 0.1497                    | 0.9420                    |
| <b>3t</b>         | y=7.4794+1.7783x<br>r=0.9757  | 0.0403                    | 0.2120                    | y=6.6947+2.7736x<br>r=0.9617 | 0.2449                    | 0.7097                    |
| <b>3u</b>         | y=7.8366+1.9685x<br>r=0.9908  | 0.0362                    | 0.1622                    | y=6.7703+1.8486x<br>r=0.9684 | 0.1102                    | 0.5440                    |
| <b>3v</b>         | y=7.9037+1.8256x<br>r=0.9816  | 0.0257                    | 0.1292                    | y=6.9022+1.7451x<br>r=0.9858 | 0.0813                    | 0.4409                    |
| <b>3w</b>         | y=7.8582+1.8000x<br>r=0.9897  | 0.0258                    | 0.1331                    | y=7.3168+2.6545x<br>r=0.9505 | 0.1338                    | 0.4068                    |
| <b>3x</b>         | y=7.6402+1.6251x<br>r=0.9881  | 0.0237                    | 0.1459                    | y=6.4681+1.4131x<br>r=0.9872 | 0.0914                    | 0.7379                    |
| <b>3y</b>         | y=7.8569+1.9504x<br>r=0.9913  | 0.0343                    | 0.1557                    | y=6.7860+2.2165x<br>r=0.9771 | 0.1564                    | 0.5921                    |
| <b>Diuron</b>     | y=5.8184+1.0029x<br>r=0.9850  | 0.1527                    | 2.8964                    | y=5.1418+0.9150x<br>r=0.9962 | 0.6999                    | >10                       |
| <b>Glyphosate</b> | y=6.4596+0.9099x<br>r=0.9784  | 0.0249                    | 0.6372                    | y=5.2477+1.1454x<br>r=0.9909 | 0.6078                    | 7.9915                    |
